# Supplementary material for: Transition-metal-free azide insertion ofN-triftosylhydrazones using a non-metallic azide source
Source: Royal Society of Chemistry journal article supplement (doi:10.1039/d2cc05442f), 2022-01-01
Supplement: d2cc05442f1.pdf [file d2cc05442f1.pdf]

## Supporting Information

### Transition-metal-free azide insertion of *N*-triftosylhydrazones using non-metallic azide source

Xueyu Li,<sup>a</sup> Jin-Na Song<sup>\*b</sup> Swastik Karmakar,<sup>c</sup> Ying Lu,<sup>a</sup> Ye Lv,<sup>a</sup> Peiqiu Liao<sup>\*a</sup> and Zhaohong Liu<sup>\*a</sup>

<sup>a</sup>Department of Chemistry, Northeast Normal University, Changchun 130024, China

<sup>b</sup>School of Life Science, Jilin University, Changchun 130012, China

<sup>c</sup>Basirhat College, A/w West Bengal State University, Basirhat-743412, West Bengal, India

### Table of Contents

|                                                    |     |
|----------------------------------------------------|-----|
| 1. General Information                             | S2  |
| 2. Optimizations of the Reaction Conditions        | S2  |
| 3. Experimental procedure                          | S3  |
| 3.1 Preparation of <i>N</i> -triftosylhydrazones   | S3  |
| 3.2 Synthesis and Analytical Data of Benzyl Azides | S4  |
| 3.3 Gram-Scale Synthesis and Further Application   | S20 |
| 4. Mechanistic Studies                             | S24 |
| 4.1 Deuterium Labelling Study                      | S24 |
| 4.2 Computational Method                           | S24 |
| 5. NMR Spectra Copies                              | S36 |
| 6. References                                      | S84 |

## 1. General Information

All manipulations were carried out by standard Schlenk techniques. The products were purified by column chromatography over silica gel (300-400 size). All the new compounds were characterized by  $^1\text{H}$  NMR,  $^{13}\text{C}$  NMR, IR, and HRMS. The known compounds were characterized by  $^1\text{H}$  NMR and  $^{13}\text{C}$  NMR. NMR spectra were recorded on a Bruker Advance 600 ( $^1\text{H}$ : 600 MHz,  $^{13}\text{C}$ : 151 MHz,  $^{19}\text{F}$ : 565 MHz) and Bruker Advance 500 ( $^1\text{H}$ : 500 MHz,  $^{13}\text{C}$ : 125 MHz,  $^{19}\text{F}$ : 470 MHz) at ambient temperature. Data were reported as chemical shifts in ppm relative to TMS (0.00 ppm) for  $^1\text{H}$  and  $\text{CDCl}_3$  (77.0 ppm) for  $^{13}\text{C}$ . The following abbreviations were used to explain the multiplicities: s = singlet, d = doublet, t = triplet, q = quartet, qi = quintet, m = multiplet, br = broad. Thin layer chromatographic (TLC) analysis was performed with glass-backed silica gel plates, visualizing with UV light (254 nm) and/or staining with aqueous  $\text{KMnO}_4$  stain. High-resolution mass spectra (HRMS) were recorded on Bruker microTof by using ESI method. All reagents were purchased from commercial sources and used without treatment, unless otherwise indicated. Dry 1,4-dioxane (water < 0.005% (by K.F.), with molecular sieve) was purchased from J&K Scientific Ltd and was used without further purification.

## 2. Optimizations of the Reaction Conditions

Table S1. Optimizations of the Reaction Conditions

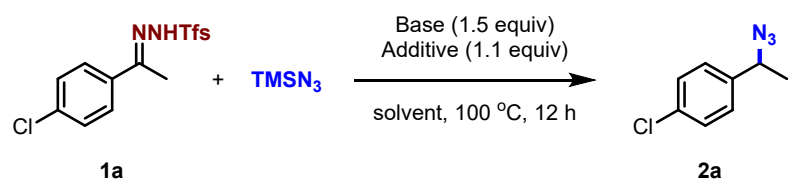

| Entry           | PCT   | Base                     | Solvent                | H <sub>2</sub> O | Yield (%) <sup>a</sup> |
|-----------------|-------|--------------------------|------------------------|------------------|------------------------|
| 1               | TBAB  | <sup>t</sup> BuOLi       | 1, 4-dioxane           | 0                | 45                     |
| 2               | TBAB  | <sup>t</sup> BuOLi       | 1, 4-dioxane           | 1                | 63                     |
| 3               | TBAB  | <sup>t</sup> BuOLi       | 1, 4-dioxane           | 2                | 85                     |
| 4               | TBAB  | <sup>t</sup> BuOLi       | 1, 4-dioxane           | 3                | 66                     |
| 5               | TBAB  | <sup>t</sup> BuOLi       | 1, 4-dioxane           | 2                | 42                     |
| 6               | TBAB  | $\text{K}_2\text{CO}_3$  | 1, 4-dioxane           | 2                | 46                     |
| 7               | TBAB  | $\text{Cs}_2\text{CO}_3$ | 1, 4-dioxane           | 2                | 52                     |
| 8               | TBAB  | KOH                      | 1, 4-dioxane           | 2                | 50                     |
| 9               | TBAB  | <sup>t</sup> BuOLi       | THF                    | 2                | 57                     |
| 10              | TBAB  | <sup>t</sup> BuOLi       | $\text{CH}_3\text{CN}$ | 2                | 42                     |
| 11              | TBAB  | <sup>t</sup> BuOLi       | $\text{PhCF}_3$        | 2                | 65                     |
| 12              | TEBAC | <sup>t</sup> BuOLi       | 1, 4-dioxane           | 2                | 60                     |
| 13              | TBAC  | <sup>t</sup> BuOLi       | 1, 4-dioxane           | 2                | 70                     |
| 14              | TEAB  | <sup>t</sup> BuOLi       | 1, 4-dioxane           | 2                | 64                     |
| 15              | TEAC  | <sup>t</sup> BuOLi       | 1, 4-dioxane           | 2                | 56                     |
| 16 <sup>b</sup> | TBAB  | <sup>t</sup> BuOLi       | 1, 4-dioxane           | 2                | 72                     |

Reaction conditions: 1 (0.3 mmol),  $\text{TMSN}_3$  (0.6 mmol),  $\text{H}_2\text{O}$  (0.6 mmol) TBAB (0.45 mmol), Base (0.33 mmol),

in Solvent (4.0 mL) at 100 °C for 12 h under argon atmosphere. <sup>a</sup>Isolated yields. <sup>b</sup>*N*-tosylhydrazone was used.

We reacted under anticipated conditions for azide insertion (Table S1). It was observed that the presence of water significantly affected the reaction yield, which indicated that the water was the proton source for the product (entries 1–4). The best result was obtained by using 2.0 equivalent of water to afford desired azide **2a** in 85% yield (entry 3). Other regular bases, such as <sup>t</sup>BuOK, K<sub>2</sub>CO<sub>3</sub>, Cs<sub>2</sub>CO<sub>3</sub>, and KOH, were then investigated but had no positive effect on the yield (entries 5-8). Although 1,4-dioxane was the best solvent, moderate yields were still obtained using other solvents such as CH<sub>3</sub>CN, THF, and PhCF<sub>3</sub> (entries 3 & 9-11). Changing the phase transfer catalyst (PCT) from tetrabutylammonium bromide (TBAB) to benzyltriethylammonium chloride (TEBAC), tetrabutylammonium chloride (TBAC), tetraethylammonium bromide (TEAB), and tetraethylammonium chloride (TEAC) proved detrimental to the product formation (entries 3 & 12-15). Finally, compared to *N*-triflylhydrazone **1a**, the corresponding *N*-tosylhydrazone **1a'** gave a much lower yield under identical conditions (entry 16). Therefore, the optimum conditions were identified as 1,4-dioxane at 100 °C in the presence of 2.0 equivalent of water using <sup>t</sup>BuOLi as a base, and TBAB as the PCT (entry 3).

### 3. Experimental Procedure

#### 2.1 Preparation of *N*-triflylhydrazones.

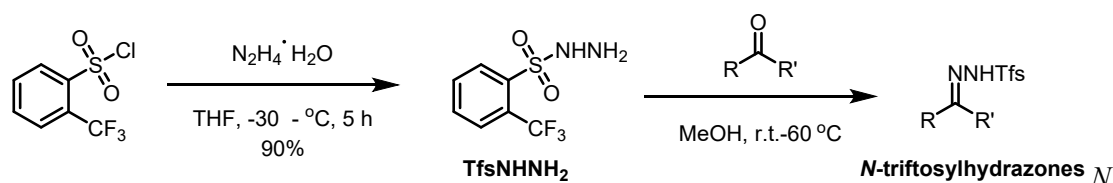

-Triflylhydrazones were synthesized according to the literature *Org. Chem. Front.* 2019, **6**, 121-124 and *Chem Catalysis* 2022, **2**, 563-577.

#### 2.2 Synthesis and Analytical Data of Benzyl Azides.

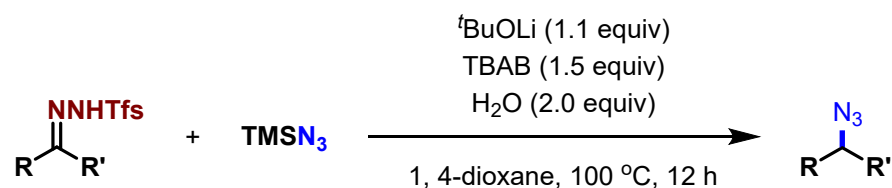

**General Procedure A:** *N*-Triflylhydrazone (0.3 mmol), <sup>t</sup>BuOLi (62.0 mg, 0.33 mmol, 1.1 equiv) were added to an oven-dried sealed tube, which was evacuated and filled with Ar for three times, followed by addition of dry 1,4-dioxane (4 mL) via syringe. The resulting mixture was stirred at room temperature for 1 h. Then, tetrabutylammonium bromide (TBAB, 145.0 mg, 0.45 mmol), TMSN<sub>3</sub> (72.8 mg, 0.6 mmol, 2.0 equiv), and H<sub>2</sub>O (11 μL, 2.0 equiv) were added under Ar atmosphere. The mixture was stirred at 100 °C for 12 h. After completion indicated by TLC, the resulting mixture was cooled to room temperature, and filtered through a short pad of silica gel with DCM as an eluent. The filtrate was evaporated

under reduced pressure a crude mixture, which was purified by column chromatography on silica gel to afford the desired benzyl azide.

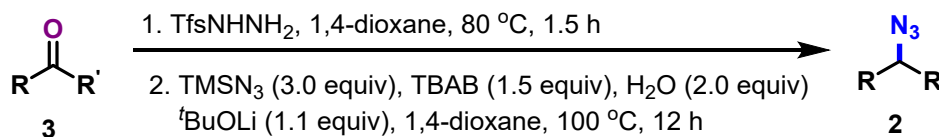

**General Procedure B:** To a stirred solution of TfsNHNH<sub>2</sub> (0.3 mmol, 1.0 equiv) in 1,4-dioxane inside a glove box were added carbonyl compounds (0.3 mmol, 1.0equiv) and the mixture was stirred for 1.5 h at 80 °C. Then, the resulting mixture was cooled to room temperature, and was added <sup>t</sup>BuOLi (62.0 mg, 0.33 mmol, 1.1 equiv), TBAB (145.0 mg, 0.45 mmol), TMSN<sub>3</sub> (72.8 mg, 0.6 mmol, 2.0 equiv), and H<sub>2</sub>O (11 μL, 2.0 equiv) under Ar atmosphere. The mixture was stirred at 100 °C for 12 h. After completion indicated by TLC, the resulting mixture was cooled to room temperature, and filtered through a short pad of silica gel with DCM as an eluent. The filtrate was evaporated under reduced pressure a crude mixture, which was purified by column chromatography on silica gel to afford the desired benzyl azide.

**Note:** Product can't be analyzed by HRMS, probably due to the decomposition.

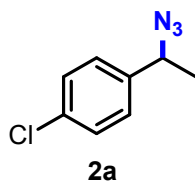

**1-(1-Azidoethyl)-4-chlorobenzene (2a):** According to **General Procedure A**, 1-(4-chlorophenyl)ethan-1-one derived *N*-triflylhydrazone **1a** (113.0 mg, 0.3 mmol) afforded **2a** (46.3 mg, 85%) as a yellow oil. <sup>1</sup>H NMR (600 MHz, CDCl<sub>3</sub>) δ 7.35 (d, *J* = 8.4 Hz, 2H), 7.26 (d, *J* = 8.4 Hz, 2H), 4.60 (q, *J* = 6.6 Hz, 1H), 1.51 (d, *J* = 6.6 Hz, 3H). <sup>13</sup>C NMR (150 MHz, CDCl<sub>3</sub>) δ 139.4, 133.9, 129.0, 127.8, 60.4, 21.6. IR (KBr): 3065, 2923, 2109, 1706, 1650, 1314, 1714, 912, 744 cm<sup>-1</sup>.

Spectroscopic data in agreement with those reported in *Adv. Synth. Catal.* 2014, **356**, 2769–2774.

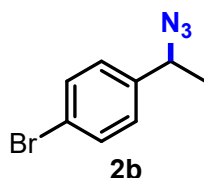

**1-(1-Azidoethyl)-4-bromobenzene (2b):** According to **General Procedure A**, 1-(4-bromophenyl)ethan-1-one-derived *N*-triflylhydrazone **1b** (126.4 mg, 0.3 mmol) afforded **2b** (55.6 mg, 82%) as a colorless oil. <sup>1</sup>H NMR (600 MHz, CDCl<sub>3</sub>) δ 7.50 (d, *J* = 8.4 Hz, 2H), 7.20 (d, *J* = 8.4 Hz, 2H), 4.58 (q, *J* = 6.6 Hz, 1H), 1.50 (d, *J* = 7.2 Hz,

3H).  $^{13}\text{C}$  NMR (150 MHz,  $\text{CDCl}_3$ )  $\delta$  139.9, 131.9, 128.0, 122.0, 60.4, 21.5. IR (KBr): 2980, 2104, 529  $\text{cm}^{-1}$ .

Spectroscopic data in agreement with those reported in *Adv. Synth. Catal.* 2014, **356**, 2769-2774.

---

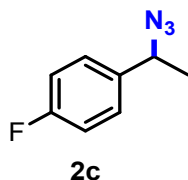

**1-(1-Azidoethyl)-4-fluorobenzene (2c):** According to **General Procedure A**, 1-(4-fluorophenyl)ethan-1-one-derived *N*-trifosylhydrazone **1c** (108.1 mg, 0.3 mmol) afforded **2c** (28.7 mg, 58%) as a colorless oil.  $^1\text{H}$  NMR (600 MHz,  $\text{CDCl}_3$ )  $\delta$  7.31-7.29 (m, 2H), 7.08-7.05 (m, 2H), 4.61 (q,  $J = 6.6$  Hz, 1H), 1.52 (d,  $J = 6.6$  Hz, 3H);  $^{13}\text{C}$  NMR (150 MHz,  $\text{CDCl}_3$ )  $\delta$  162.4 (d,  $J = 245.1$  Hz), 136.7 (d,  $J = 3.2$  Hz), 128.1 (d,  $J = 8.1$  Hz), 115.6 (d,  $J = 21.5$  Hz), 60.4, 21.6. IR (KBr): 2101  $\text{cm}^{-1}$ .

Spectroscopic data in agreement with those reported in *Adv. Synth. Catal.* 2014, **356**, 2769-2774.

---

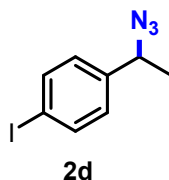

**1-(1-Azidoethyl)-4-iodobenzene (2d):** According to **General Procedure A**, 1-(4-iodophenyl)ethan-1-one-derived *N*-trifosylhydrazone **1d** (140.5 mg, 0.3 mmol) afforded **2d** (51.6 mg, 63%) as a colorless oil. (**2d**)  $^1\text{H}$  NMR (600 MHz,  $\text{CDCl}_3$ )  $\delta$  7.70 (d,  $J = 8.4$  Hz, 2H), 7.07 (d,  $J = 8.4$  Hz, 2H), 4.57 (q,  $J = 6.6$  Hz, 1H), 1.50 (d,  $J = 6.6$  Hz, 3H).  $^{13}\text{C}$  NMR (150 MHz,  $\text{CDCl}_3$ )  $\delta$  140.6, 137.9, 128.3, 93.6, 60.5, 21.5. IR (KBr): 2976, 2098, 1481, 1405, 1237, 1061, 999, 913, 817, 745  $\text{cm}^{-1}$ .

Spectroscopic data in agreement with those reported in *Adv. Synth. Catal.* 2014, **356**, 2769-2774.

---

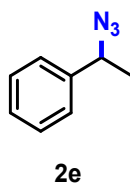

**(1-Azidoethyl)benzene (2e):** According to **General Procedure A**, acetophenone - derived *N*-triftosylhydrazone **1e** (102.7 mg, 0.3 mmol) afforded **2e** (30.5 mg, 69%) as a colorless oil. **(2e)**  $^1\text{H NMR}$  (600 MHz,  $\text{CDCl}_3$ )  $\delta$  7.39-7.37 (m, 2H), 7.33-7.31 (m, 3H), 4.62 (q,  $J = 6.6$  Hz, 1H), 1.53 (d,  $J = 6.6$  Hz, 3H).  $^{13}\text{C NMR}$  (150 MHz,  $\text{CDCl}_3$ )  $\delta$  140.8, 128.8, 128.1, 126.4, 61.1, 21.6. **IR** (KBr): 2920, 2851, 2101, 1657, 1632, 1469, 1312, 1258, 913, 698  $\text{cm}^{-1}$ .

Spectroscopic data in agreement with those reported in *Adv. Synth. Catal.* 2014, **356**, 2769-2774.

---

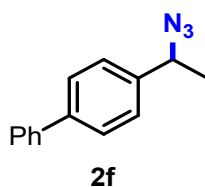

**4-(1-Azidoethyl)-1,1'-biphenyl (2f):** According to **General Procedure A**, 1-([1,1'-biphenyl]-4-yl)ethan-1-one-derived *N*-triftosylhydrazone **1f** (125.4 mg, 0.3 mmol) afforded **2f** (56.3 mg, 84%) as a colorless liquid.  $^1\text{H NMR}$  (600 MHz,  $\text{CDCl}_3$ )  $\delta$  7.64-7.53 (t,  $J = 7.8$  Hz, 4H), 7.44 (t,  $J = 7.8$  Hz, 2H), 7.39 (d,  $J = 8.4$  Hz, 2H), 7.35 (t,  $J = 7.8$  Hz, 1H), 4.65 (q,  $J = 6.6$  Hz, 1H), 1.56 (d,  $J = 6.6$  Hz, 3H).  $^{13}\text{C NMR}$  (150 MHz,  $\text{CDCl}_3$ )  $\delta$  141.1, 140.6, 139.8, 128.8, 127.5, 127.4, 127.1, 126.8, 60.8, 21.5  $\text{cm}^{-1}$ .

Spectroscopic data in agreement with those reported in *J. Am. Chem. Soc.* 2020, **142**, 17693-17702.

---

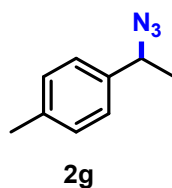

**1-(1-Azidoethyl)-4-methylbenzene (2g):** According to **General Procedure A**, 1-(*p*-tolyl)ethan-1-one-derived *N*-triftosylhydrazone **1g** (106.9 mg, 0.3 mmol) afforded **2g** (43.0 mg, 89%) as a white solid.  $^1\text{H NMR}$  (600 MHz,  $\text{CDCl}_3$ )  $\delta$  7.21 (d,  $J = 8.1$  Hz, 2H), 7.18 (d,  $J = 8.1$  Hz, 2H), 4.57 (q,  $J = 6.6$  Hz, 1H), 2.35 (s, 3H), 1.51 (d,  $J = 6.6$  Hz, 3H).  $^{13}\text{C NMR}$  (150 MHz,  $\text{CDCl}_3$ )  $\delta$  137.9, 137.8, 129.4, 126.3, 60.9, 21.5, 21.1.

Spectroscopic data in agreement with those reported in *Adv. Synth. Catal.* 2014, **356**, 2769-2774.

---

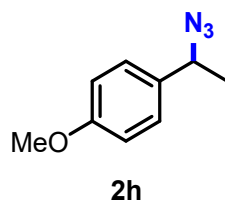

**1-(1-Azidoethyl)-4-methoxybenzene (2h):** According to **General Procedure A**, 1-(4-methoxyphenyl)ethan-1-one-derived *N*-trifosylhydrazone **1h** (111.7 mg, 0.3 mmol) afforded **2h** (51.0 mg, 96%) as a yellow oil; (**2h**)  $^1\text{H NMR}$  (600 MHz,  $\text{CDCl}_3$ )  $\delta$  7.25 (d,  $J = 8.5$  Hz, 2H), 6.90 (d,  $J = 8.5$  Hz, 2H), 4.56 (q,  $J = 6.6$  Hz, 1H), 3.81 (s, 3H), 1.50 (d,  $J = 7.2$  Hz, 3H).  $^{13}\text{C NMR}$  (150 MHz,  $\text{CDCl}_3$ )  $\delta$  159.4, 132.8, 127.6, 114.1, 60.7, 55.3, 21.4. **IR** (KBr): 2978, 2934, 2837, 2102, 1611, 1513, 1248, 1178, 1034, 832  $\text{cm}^{-1}$ .

Spectroscopic data in agreement with those reported in *Adv. Synth. Catal.* 2014, **356**, 2769–2774.

---

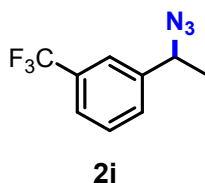

**1-(1-Azidoethyl)-3-(trifluoromethyl)benzene (2i):** According to **General Procedure A**, *N*-trifosylhydrazone **1i** (123.1 mg, 0.3 mmol) derived from 1-(3-(trifluoromethyl)phenyl)ethan-1-one afforded **2i** (47.1 mg, 73%) as a colorless oil;  $^1\text{H NMR}$  (600 MHz,  $\text{CDCl}_3$ )  $\delta$  7.58 (s, 2H), 7.53–7.49 (m, 2H), 4.70 (q,  $J = 6.6$  Hz, 1H), 1.56 (d,  $J = 6.6$  Hz, 3H).  $^{13}\text{C NMR}$  (150 MHz,  $\text{CDCl}_3$ )  $\delta$  142.1, 131.2 (q,  $J = 32.3$  Hz), 129.7, 129.3, 124.9 (q,  $J = 3.8$  Hz), 123.9 (q,  $J = 270.9$  Hz), 123.2 (q,  $J = 3.8$  Hz), 60.5, 21.7.

Spectroscopic data in agreement with those reported in *New J. Chem.*, 2016, **40**, 10240–10245.

---

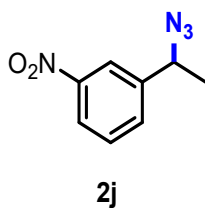

**1-(1-Azidoethyl)-3-nitrobenzene (2j):** According to **General Procedure A**, 1-(3-nitrophenyl)ethan-1-one-derived *N*-trifosylhydrazone **1j** (116.2 mg, 0.3 mmol)

afforded **2j** (24.8 mg, 43%) as a colorless oil;  $^1\text{H NMR}$  (600 MHz,  $\text{CDCl}_3$ )  $\delta$  8.21-8.18 (m, 2H), 7.68 (d,  $J = 7.8$  Hz, 1H), 7.57 (t,  $J = 8.4$  Hz, 1H), 4.76 (q,  $J = 6.6$  Hz, 1H), 1.60 (d,  $J = 7.2$  Hz, 3H).  $^{13}\text{C NMR}$  (150 MHz,  $\text{CDCl}_3$ )  $\delta$  148.5, 143.2, 132.4, 129.8, 123.1, 121.4, 60.0, 21.7. **IR** (KBr): 2981, 2920, 2850, 2109, 1530, 1351, 1247, 898, 807, 737, 687  $\text{cm}^{-1}$ .

Spectroscopic data in agreement with those reported in *New J. Chem.* 2020, **40**, 10240-10245.

---

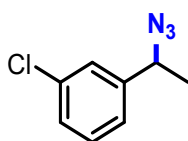

**2k**

**1-(1-Azidoethyl)-3-chlorobenzene (2k):** According to **General Procedure A**, 1-(3-chlorophenyl)ethan-1-one-derived *N*-trifosylhydrazone **1k** (113.0 mg, 0.3 mmol) afforded **2k** (41.3 mg, 76%) as a colorless oil;  $^1\text{H NMR}$  (600 MHz,  $\text{CDCl}_3$ )  $\delta$  7.33-7.28 (m, 3H), 7.21 (dt,  $J = 6.6$  Hz,  $J = 1.8$  Hz, 1H), 4.59 (q,  $J = 6.6$  Hz, 1H), 1.52 (d,  $J = 6.6$  Hz, 3H);  $^{13}\text{C NMR}$  (150 MHz,  $\text{CDCl}_3$ )  $\delta$  143.0, 134.6, 130.1, 128.3, 126.6, 124.5, 60.4, 21.6; **IR** (KBr): 2980, 2927, 2100, 1579, 1431, 1249, 1073, 998, 911, 788, 695  $\text{cm}^{-1}$ .

---

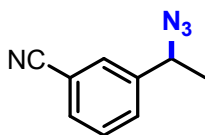

**2l**

**3-(1-Azidoethyl)benzonitrile (2l):** According to **General Procedure A**, 3-acetylbenzonitrile-derived *N*-trifosylhydrazone **1l** (110.2 mg, 0.3 mmol) afforded **2l** (26.3mg 51%) as a colorless oil;  $^1\text{H NMR}$  (600 MHz,  $\text{CDCl}_3$ )  $\delta$  7.62 (d,  $J = 12.0$  Hz, 2H), 7.57 (d,  $J = 7.8$  Hz, 1H), 7.49 (t,  $J = 7.8$  Hz, 1H), 4.67 (q,  $J = 6.6$  Hz, 1H), 1.55 (d,  $J = 7.2$  Hz, 3H).  $^{13}\text{C NMR}$  (150 MHz,  $\text{CDCl}_3$ )  $\delta$  142.6, 131.7, 130.7, 129.9, 129.6, 118.4, 113.0, 60.0, 21.6  $\text{cm}^{-1}$ .

Spectroscopic data in agreement with those reported in *New J. Chem.* 2020, **44**, 21238-21242.

---



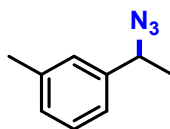

**2m**

**1-(1-Azidoethyl)-3-methylbenzene (2m):** According to **General Procedure A**, 1-(*m*-tolyl)ethan-1-one-derived *N*-trifosylhydrazone **1m** (106.9 mg, 0.3 mmol) afforded **2m** (39.7 mg, 82%) as a colorless oil;  $^1\text{H NMR}$  (600 MHz,  $\text{CDCl}_3$ )  $\delta$  7.26 (t,  $J = 7.8$  Hz, 1H), 7.13-7.11 (m, 3H), 4.57 (q,  $J = 6.6$  Hz, 1H), 2.37 (s, 3H), 1.52 (d,  $J = 6.6$  Hz, 3H).  $^{13}\text{C NMR}$  (150 MHz,  $\text{CDCl}_3$ )  $\delta$  140.8, 138.5, 128.9, 128.6, 127.1, 123.4, 61.1, 21.5, 21.4. **IR** (KBr): 3354, 3191, 2920, 2851, 2360, 2339, 2107, 1657, 1632, 1469, 1247, 912, 745  $\text{cm}^{-1}$ .

Spectroscopic data in agreement with those reported in *Adv. Synth. Catal.* 2014, **356**, 2769-2774.

---

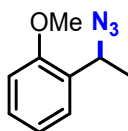

**2n**

**1-(1-Azidoethyl)-2-methoxybenzene (2n):** According to **General Procedure A**, 1-(2-methoxyphenyl)ethan-1-one-derived *N*-trifosylhydrazone **1n** (111.7 mg, 0.3 mmol) afforded **2n** (48.4 mg, 91%) as a colorless oil;  $^1\text{H NMR}$  (600 MHz,  $\text{CDCl}_3$ )  $\delta$  7.34 (d,  $J = 7.8$  Hz, 1H), 7.28 (t,  $J = 7.2$  Hz, 1H), 6.98 (t,  $J = 7.2$  Hz, 1H), 6.89 (d,  $J = 7.8$  Hz, 1H), 5.06 (q,  $J = 6.6$  Hz, 1H), 3.85 (s, 3H), 1.49 (d,  $J = 6.6$  Hz, 3H).  $^{13}\text{C NMR}$  (150 MHz,  $\text{CDCl}_3$ )  $\delta$  156.5, 129.1, 129.0, 126.5, 120.7, 110.6, 55.4, 54.9, 20.1. **IR** (KBr): 2935, 2838, 2095, 1601, 1492, 1462, 1268, 1245, 1029, 910, 801, 753  $\text{cm}^{-1}$ .

Spectroscopic data in agreement with those reported in *Synthesis* 2015, **47**, 323-329.

---

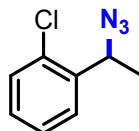

**2o**

**1-(1-Azidoethyl)-2-chlorobenzene (2o):** According to **General Procedure A**, 1-(2-chlorophenyl)ethan-1-one-derived *N*-trifosylhydrazone **1o** (113.0 mg, 0.3 mmol) afforded **2o** (34.2 mg, 63%) as a colorless oil;  $^1\text{H NMR}$  (600 MHz,  $\text{CDCl}_3$ )  $\delta$  7.47 (d,  $J = 7.8$  Hz, 1H), 7.38 (d,  $J = 7.8$  Hz, 1H), 7.31 (t,  $J = 7.8$  Hz, 1H), 7.24 (t,  $J = 7.8$  Hz, 1H), 5.14 (q,  $J = 6.6$  Hz, 1H), 1.52 (d,  $J = 7.2$  Hz, 3H).  $^{13}\text{C NMR}$  (150 MHz,  $\text{CDCl}_3$ )  $\delta$  138.7, 132.5, 129.7, 129.0, 127.4, 127.2, 57.4, 20.7. **IR** (KBr): 3021, 2930, 2104,

1475, 1394, 1318, 1250, 1131, 1031, 816.

Spectroscopic data in agreement with those reported in *J. C. Chem. Soc.* 2014, **61**, 737-742.

---

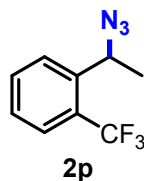

**1-(1-Azidoethyl)-2-(trifluoromethyl)benzene (2p):** According to **General Procedure A**, 1-(3,4-dichlorophenyl)ethan-1-one-derived *N*-triflylhydrazone **1p** (123.4 mg, 0.3 mmol) afforded **2p** (29.7 mg, 46%) as a colorless oil; **<sup>1</sup>H NMR** (500 MHz, CDCl<sub>3</sub>) δ 7.68-7.64 (m, 2H), 7.62 (t, *J* = 7.0 Hz, 1H), 7.42 (t, *J* = 7.0 Hz, 1H), 5.11 (q, *J* = 6.5 Hz, 1H), 1.51 (d, *J* = 6.5 Hz, 3H). **<sup>13</sup>C NMR** (151 MHz, CDCl<sub>3</sub>) δ 140.5, 132.6, 128.0, 127.9, 127.4 (q, *J* = 30.0 Hz), 125.6 (q, *J* = 5.8 Hz), 124.2 (q, *J* = 274.2 Hz), 56.6, 22.7. **<sup>19</sup>F NMR** (470 MHz, CDCl<sub>3</sub>) δ -58.1 (s).

---

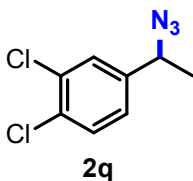

**4-(1-Azidoethyl)-1,2-dichlorobenzene (2q):** According to **General Procedure A**, 1-(2-(trifluoromethyl)phenyl)ethan-1-one-derived *N*-triflylhydrazone **1q** (123.1 mg, 0.3 mmol) afforded **2q** (44.1 mg, 68%) as a colorless oil; **<sup>1</sup>H NMR** (600 MHz, CDCl<sub>3</sub>) δ 7.45 (d, *J* = 8.4 Hz, 1H), 7.42 (s, 1H), 7.17 (d, *J* = 8.4 Hz, 1H), 4.59 (q, *J* = 6.6 Hz, 1H), 1.51 (d, *J* = 6.6 Hz, 3H). **<sup>13</sup>C NMR** (150 MHz, CDCl<sub>3</sub>) δ 141.2, 132.9, 132.1, 130.7, 128.4, 125.7, 59.8, 21.6. **IR** (KBr): 2981, 2929, 2103, 1470, 1394, 1318, 1249, 1133, 1031, 821.

---

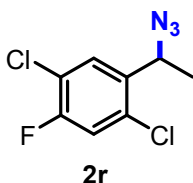

**1-(1-Azidoethyl)-2,5-dichloro-4-fluorobenzene (2r):** According to **General Procedure A**, 1-(2,5-dichloro-4-fluorophenyl)ethan-1-one-derived *N*-triflylhydrazone **1r** (128.8 mg, 0.3 mmol) afforded **2r** (53.4 mg, 76%) as a colorless

oil;  $^1\text{H NMR}$  (600 MHz,  $\text{CDCl}_3$ )  $\delta$  7.44 (d,  $J = 6.6$  Hz, 1H), 7.28 (d,  $J = 9.6$  Hz, 1H), 5.04 (q,  $J = 6.6$  Hz, 1H), 1.50 (d,  $J = 7.2$  Hz, 3H).  $^{13}\text{C NMR}$  (150 MHz,  $\text{CDCl}_3$ )  $\delta$  157.2 (d,  $J = 249.2$  Hz), 139.6 (d,  $J = 5.9$  Hz), 131.1, 127.3 (d,  $J = 3.6$  Hz), 121.1 (d,  $J = 19.5$  Hz), 115.2 (d,  $J = 24.2$  Hz), 57.0, 20.6. **IR** (KBr): 3357, 2983, 2921, 2851, 2094, 21 1473, 1386, 1262, 1089, 885, 727  $\text{cm}^{-1}$ .

---

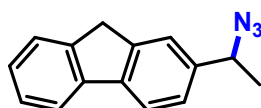

**2s**

**2-(1-Azidoethyl)-9H-fluorene (2s):** According to **General Procedure A**, 1-(9H-fluoren-2-yl)ethan-1-one-derived *N*-trifosylhydrazone **1s** (129.1 mg, 0.3 mmol) afforded **2s** (56.5 mg, 80%) as a yellow oil;  $^1\text{H NMR}$  (600 MHz,  $\text{CDCl}_3$ )  $\delta$  7.77-7.75 (m, 2H), 7.53 (d,  $J = 7.2$  Hz, 1H), 7.50 (s, 1H), 7.36 (t,  $J = 7.2$  Hz, 1H), 7.32-7.28 (m, 2H), 4.67 (q,  $J = 6.6$  Hz, 1H), 3.88 (s, 2H), 1.57 (d,  $J = 6.6$  Hz, 3H).  $^{13}\text{C NMR}$  (150 MHz,  $\text{CDCl}_3$ )  $\delta$  143.8, 143.4, 141.8, 141.1, 139.4, 126.9, 126.8, 125.2, 125.0, 123.0, 120.0, 120.0, 61.4, 36.9, 21.7. **IR** (KBr): 2975, 2926, 2098, 1455, 1258, 1058, 913, 769, 737  $\text{cm}^{-1}$ .

---

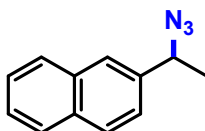

**2t**

**2-(1-Azidoethyl)naphthalene (2t):** According to **General Procedure A**, 1-(naphthalen-2-yl)ethan-1-one-derived *N*-trifosylhydrazone **1t** (129.1 mg, 0.3 mmol) afforded **2t** (56.5 mg, 80%) as a yellow oil;  $^1\text{H NMR}$  (600 MHz,  $\text{CDCl}_3$ )  $\delta$  7.87-7.83 (m, 3H), 7.76 (s, 1H), 7.51-7.48 (m, 2H), 7.45 (dd,  $J = 10.2$  Hz,  $J = 2.4$  Hz, 1H), 4.78 (q,  $J = 8.4$  Hz, 1H), 1.61 (d,  $J = 8.4$  Hz, 3H).  $^{13}\text{C NMR}$  (150 MHz,  $\text{CDCl}_3$ )  $\delta$  138.2, 133.2, 133.1, 128.7, 128.0, 127.7, 126.4, 126.2, 125.3, 124.2, 61.3, 21.6.

Spectroscopic data in agreement with those reported in *New J. Chem.*, 2016, **40**, 10240-10245.

---

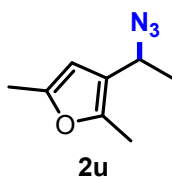

**3-(1-Azidoethyl)-2,5-dimethylfuran (2u):** According to **General Procedure A**, 1-(2,5-dimethylfuran-3-yl)ethan-1-one-derived *N*-trifosylhydrazone **1u** (108.1 mg, 0.3 mmol) afforded **2u** (41.6 mg, 84%) as a yellow oil;  $^1\text{H NMR}$  (600 MHz,  $\text{CDCl}_3$ )  $\delta$  5.92 (s, 1H), 4.48 (q,  $J = 6.6$  Hz, 1H), 2.25 (s, 3H), 2.24 (s, 3H), 1.41 (d,  $J = 6.6$  Hz, 3H).  $^{13}\text{C NMR}$  (150 MHz,  $\text{CDCl}_3$ )  $\delta$  150.3, 146.8, 119.4, 104.3, 53.2, 20.8, 13.4, 11.6. **IR** (KBr): 2960, 2923, 2852, 2105, 1586, 1454, 1260, 1229, 1062, 1016, 800  $\text{cm}^{-1}$ .

---

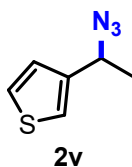

**3-(1-Azidoethyl)thiophene (2v):** According to **General Procedure A**, 1-(thiophen-3-yl)ethan-1-one-derived *N*-trifosylhydrazone **1v** (104.5 mg, 0.3 mmol) afforded **2v** (37.7 mg, 82%) as a colorless oil;  $^1\text{H NMR}$  (600 MHz,  $\text{CDCl}_3$ )  $\delta$  7.35-7.34 (m, 1H), 7.22 (s, 1H), 7.08 (d,  $J = 4.8$  Hz, 1H), 4.66 (q,  $J = 6.6$  Hz, 1H), 1.56 (d,  $J = 7.2$  Hz, 3H).  $^{13}\text{C NMR}$  (150 MHz,  $\text{CDCl}_3$ )  $\delta$  141.8, 126.6, 125.8, 121.7, 56.6, 20.8. **IR** (KBr): 2920, 2850, 2361, 2339, 2105, 912, 669  $\text{cm}^{-1}$ .

Spectroscopic data in agreement with those reported in *New J. Chem.*, 2016, **40**, 10240-10245.

---

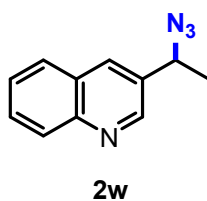

**3-(1-Azidoethyl)quinoline (2w):** According to **General Procedure A**, 1-(quinolin-3-yl)ethan-1-one-derived *N*-trifosylhydrazone **1w** (118.0 mg, 0.3 mmol) afforded **2w** (30.9 mg, 52%) as a yellow oil;  $^1\text{H NMR}$  (600 MHz,  $\text{CDCl}_3$ )  $\delta$  8.90 (s, 1H), 8.12 (d,  $J = 8.4$  Hz, 1H), 8.10 (s, 1H), 7.84 (d,  $J = 8.4$  Hz, 1H), 7.73 (d,  $J = 7.8$  Hz, 1H), 7.58 (d,  $J = 7.8$  Hz, 1H), 4.86 (q,  $J = 6.6$  Hz, 1H), 1.67 (d,  $J = 7.2$  Hz, 3H).  $^{13}\text{C NMR}$  (150 MHz,  $\text{CDCl}_3$ )  $\delta$  149.4, 147.9, 133.6, 133.0, 129.7, 129.3, 127.8, 127.6, 127.1, 58.8, 21.4. **IR** (KBr): 2977, 2929, 2102, 1571, 1495, 1259, 1062, 1017, 910, 788, 751  $\text{cm}^{-1}$ .

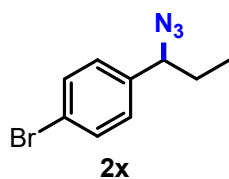

**1-(1-Azidopropyl)-4-bromobenzene (2x):** According to **General Procedure A**, 1-(4-bromophenyl)propan-1-one-derived *N*-trifosylhydrazone **1x** (130.6 mg, 0.3 mmol) afforded **2x** (61.2 mg, 85%) as a yellow oil;  $^1\text{H NMR}$  (600 MHz,  $\text{CDCl}_3$ )  $\delta$  7.50 (d,  $J = 8.4$  Hz, 2H), 7.17 (d,  $J = 7.8$  Hz, 2H), 4.32 (t,  $J = 7.2$  Hz, 1H), 1.87-1.80 (m, 1H), 1.79-1.71 (m, 1H), 0.92 (t,  $J = 7.2$  Hz, 3H).  $^{13}\text{C NMR}$  (150 MHz,  $\text{CDCl}_3$ )  $\delta$  138.7, 131.9, 128.6, 122.0, 67.1, 29.3, 10.6. **IR** (KBr): 2969, 2929, 2096, 1485, 1242, 1075, 1009, 913, 818, 1009, 914, 817, 744, 523  $\text{cm}^{-1}$ .

Spectroscopic data in agreement with those reported in *Angew. Chem. Int. Ed.* 2012, **51**, 5950-5952.

---

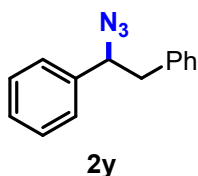

**(1-Azidoethane-1,2-diyl)dibenzene (2y):** According to **General Procedure A**, 1,2-diphenylethan-1-one-derived *N*-trifosylhydrazone **1x** (125.5 mg, 0.3 mmol) afforded **2y** (54.3 mg, 81%) as a colorless oil;  $^1\text{H NMR}$  (600 MHz,  $\text{CDCl}_3$ )  $\delta$  7.38-7.35 (m, 2H), 7.33-7.31 (m, 1H), 7.29-7.26 (m, 4H), 7.25-7.22 (m, 1H), 7.14 (d,  $J = 6.6$  Hz, 2H), 4.66 (dd,  $J = 8.4$  Hz,  $J = 6.6$  Hz, 1H), 3.10-3.00 (m, 2H).  $^{13}\text{C NMR}$  (150 MHz,  $\text{CDCl}_3$ )  $\delta$  139.3, 137.4, 129.4, 128.7, 128.4, 128.3, 126.9, 126.9, 67.7, 43.0. **IR** (KBr): 3028, 2921, 2097, 1489, 1449, 1234, 912, 745, 694  $\text{cm}^{-1}$ .

Spectroscopic data in agreement with those reported in *J. Am. Chem. Soc.* 2020, **142**, 11388-11393.

---

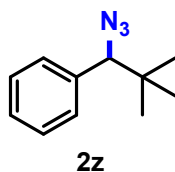

**(1-Azido-2,2-dimethylpropyl)benzene (2z):** According to **General Procedure A**, 2,2-dimethyl-1-phenylpropan-1-one-derived *N*-trifosylhydrazone **1z** (115.3 mg, 0.3

mmol) afforded **2z** (51.7 mg, 91%) as a colorless oil;  $^1\text{H NMR}$  (600 MHz,  $\text{CDCl}_3$ )  $\delta$  7.36-7.33 (m, 2H), 7.31-7.29 (m, 1H), 7.25 (d,  $J = 7.8$  Hz, 2H), 4.27 (s, 1H), 0.91 (s, 9H).  $^{13}\text{C NMR}$  (150 MHz,  $\text{CDCl}_3$ )  $\delta$  137.6, 128.5, 127.9, 127.8, 76.6, 35.8, 26.4. **IR** (KBr): 2961, 2921, 2102, 1257, 911, 738, 702, 418  $\text{cm}^{-1}$ .

---

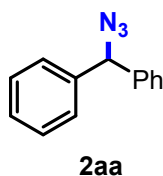

**(Azidomethylene)dibenzene (2aa):** According to **General Procedure A**, benzophenone-derived *N*-trifosylhydrazone **1aa** (121.3 mg, 0.3 mmol) afforded **2aa** (58.4 mg, 93%) as a colorless oil;  $^1\text{H NMR}$  (600 MHz,  $\text{CDCl}_3$ )  $\delta$  7.37-7.34 (m, 4H), 7.31-7.30 (m, 6H), 5.71 (s, 1H).  $^{13}\text{C NMR}$  (150 MHz,  $\text{CDCl}_3$ )  $\delta$  139.6, 128.7, 128.0, 127.4, 68.5. **IR** (KBr): 3030, 2098, 1492, 1452, 1238, 742, 698, 640  $\text{cm}^{-1}$ .

Spectroscopic data in agreement with those reported in *J. Am. Chem. Soc.* 2020, **142**, 11388-11393.

---

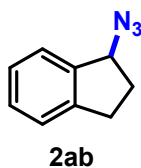

**1-Azido-2,3-dihydro-1H-indene (2ab):** According to **General Procedure A**, 2,3-dihydro-1H-inden-1-one-derived *N*-trifosylhydrazone **1ab** (110.5 mg, 0.3 mmol) afforded **2ab** (59.6 mg, 83%) as a colorless oil;  $^1\text{H NMR}$  (600 MHz,  $\text{CDCl}_3$ )  $\delta$  7.39 (d,  $J = 7.2$  Hz, 1H), 7.30-7.25 (m, 3H), 4.87-4.85 (m, 1H), 3.11-3.06 (m, 1H), 2.90-2.85 (m, 1H), 2.47-2.42 (m, 1H), 2.15-2.10 (m, 1H).  $^{13}\text{C NMR}$  (150 MHz,  $\text{CDCl}_3$ )  $\delta$  143.6, 140.6, 128.8, 126.8, 125.0, 124.5, 65.8, 32.5, 30.4. **IR** (KBr): 2922, 2851, 2093, 1475, 1458, 1322, 1257, 1089, 1019, 801, 752  $\text{cm}^{-1}$ .

Spectroscopic data in agreement with those reported in *Synthesis* 2015, **47**, 323-329.

---

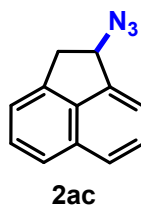

**1-Azido-1,2-dihydroacenaphthylene (2ac):** According to **General Procedure A**,

acenaphthylen-1(2H)-one-derived *N*-trifosylhydrazone **1ac** (121.3 mg, 0.3 mmol) afforded **2ac** (29.9 mg, 51%) as a colorless oil;  $^1\text{H NMR}$  (600 MHz,  $\text{CDCl}_3$ )  $\delta$  7.78 (d,  $J = 7.8$  Hz, 1H), 7.67 (d,  $J = 8.4$  Hz, 1H), 7.58-7.48 (m, 3H), 7.34 (d,  $J = 6.6$  Hz, 1H), 5.37 (d,  $J = 7.2$  Hz, 1H), 3.80 (dd,  $J = 18.0$  Hz,  $J = 7.8$  Hz, 1H), 3.39 (d,  $J = 17.4$  Hz, 1H).  $^{13}\text{C NMR}$  (150 MHz,  $\text{CDCl}_3$ )  $\delta$  141.4, 141.1, 137.5, 131.4, 128.3, 127.9, 125.4, 123.0, 120.6, 119.9, 63.0, 38.6. **IR** (KBr): 3042, 2921, 2095, 1604, 1494, 1421, 1303, 1246, 971, 776, 556  $\text{cm}^{-1}$ .

---

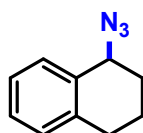

**2ad**

**1-Azido-1,2,3,4-tetrahydronaphthalene (2ad):** According to **General Procedure A**, 3,4-dihydronaphthalen-1(2H)-one-derived *N*-trifosylhydrazone **1ad** (114.7 mg, 0.3 mmol) afforded **2ad** (45.2 mg, 87%) as a colorless oil;  $^1\text{H NMR}$  (600 MHz,  $\text{CDCl}_3$ )  $\delta$  7.30 (d,  $J = 7.2$  Hz, 1H), 7.24-7.20 (m, 2H), 7.13 (d,  $J = 7.2$  Hz, 1H), 4.57-4.56 (m, 1H), 2.87-2.83 (m, 1H), 2.77-2.73 (m, 1H), 2.04-1.95 (m, 3H), 1.84-1.80 (m, 1H).  $^{13}\text{C NMR}$  (150 MHz,  $\text{CDCl}_3$ )  $\delta$  137.3, 133.7, 129.4, 129.1, 128.1, 126.1, 56.5, 29.1, 28.7, 19.0. **IR** (KBr): 3021, 2937, 2095, 1490, 1453, 1232, 1059, 943, 765, 741  $\text{cm}^{-1}$ . Spectroscopic data in agreement with those reported in *J. Am. Chem. Soc.* 2020, **142**, 11388-11393.

---

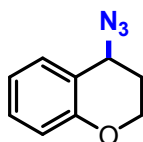

**2ae**

**4-Azidochromane (2ae):** According to **General Procedure A**, chroman-4-one-derived *N*-trifosylhydrazone **1ae** (115.3 mg, 0.3 mmol) afforded **2ae** (41.5 mg, 79%) as a colorless oil;  $^1\text{H NMR}$  (600 MHz,  $\text{CDCl}_3$ )  $\delta$  7.26-7.23 (m, 1H), 7.21 (d,  $J = 7.2$  Hz, 1H), 6.94 (t,  $J = 7.2$  Hz, 1H), 6.88 (d,  $J = 8.4$  Hz, 1H), 4.61-4.59 (m, 1H), 4.30-4.26 (m, 1H), 4.24-4.20 (m, 1H), 2.20-2.14 (m, 1H), 2.05-2.01 (m, 1H).  $^{13}\text{C NMR}$  (150 MHz,  $\text{CDCl}_3$ )  $\delta$  154.6, 130.2, 129.9, 120.5, 119.1, 117.4, 62.0, 54.6, 28.1. **IR** (KBr): 2931, 2886, 2100, 1608, 1583, 1488, 1454, 1310, 1269, 1250, 1226, 1118, 1057, 1018, 755, 624  $\text{cm}^{-1}$ .

Spectroscopic data in agreement with those reported in *J. Am. Chem. Soc.* 2020, **142**,

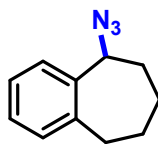**2af**

**5-Azido-6,7,8,9-tetrahydro-5H-benzo[7]annulene (2af):** According to **General Procedure A**, benzaldehyde-derived *N*-trifosylhydrazone **1af** (102.7 mg, 0.3 mmol) afforded **2af** (47.7 mg, 85%) as a white solid;  $^1\text{H NMR}$  (600 MHz,  $\text{CDCl}_3$ )  $\delta$  7.29 (dd,  $J = 6.6, 2.4$  Hz, 1H), 7.22-7.16 (m, 2H), 7.16-7.14 (m, 1H), 4.79-4.77 (m, 1H), 3.03-2.96 (m, 2H), 2.75-2.71 (m, 1H), 2.13-2.07 (m, 1H), 1.95-1.88 (m, 2H), 1.84-1.81 (m, 1H), 1.74-1.69 (m, 1H), 1.62 (q,  $J = 11.4$  Hz, 1H).  $^{13}\text{C NMR}$  (150 MHz,  $\text{CDCl}_3$ )  $\delta$  142.0, 139.3, 130.1, 128.0, 127.7, 126.1, 66.9, 35.7, 33.0, 27.6, 27.4. IR (KBr): 3450, 3020, 2928, 2856, 2102, 1450, 1258, 1055, 974, 750  $\text{cm}^{-1}$ ;

Spectroscopic data in agreement with those reported in *Bioorg. Med. Chem. Lett.* 2016, **26**, 4292–4295

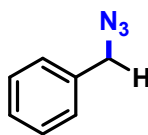**2ag**

**(Azidomethyl)benzene (2ag):** According to **General Procedure A**, benzaldehyde-derived *N*-trifosylhydrazone **1ag** (102.7 mg, 0.3 mmol) afforded **2ag** (26.0 mg, 65%) as a colorless oil;  $^1\text{H NMR}$  (600 MHz,  $\text{CDCl}_3$ )  $\delta$  7.39 (t,  $J = 7.2$  Hz, 1H), 7.35 (d,  $J = 7.2$  Hz, 1H), 7.32 (d,  $J = 7.1$  Hz, 1H), 7.26 (s, 1H).  $^{13}\text{C NMR}$  (150 MHz,  $\text{CDCl}_3$ )  $\delta$  135.4, 128.8, 128.3, 128.2, 54.8. IR (KBr): 2931, 2090  $\text{cm}^{-1}$ .

Spectroscopic data in agreement with those reported in *Green Chem.* 2021, **23**, 7499–7505.

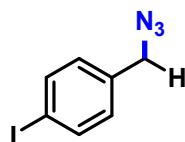**2ah**

**1-(Azidomethyl)-4-iodobenzene (2ah):** According to **General Procedure A**, 4-iodobenzaldehyde-derived *N*-trifosylhydrazone **1ag** (140.5 mg, 0.3 mmol) afforded



**2ah** (63.7 mg, 82%) as a colorless oil;  $^1\text{H NMR}$  (500 MHz,  $\text{CDCl}_3$ )  $\delta$  7.70 (d,  $J = 8.5$  Hz, 2H), 7.04 (d,  $J = 8.5$  Hz, 2H), 4.27 (s, 2H).  $^{13}\text{C NMR}$  (150 MHz,  $\text{CDCl}_3$ )  $\delta$  137.8, 134.9, 129.9, 93.9, 54.0.

Spectroscopic data in agreement with those reported in *Org. Lett.* 2021, **23**, 118–123.

---

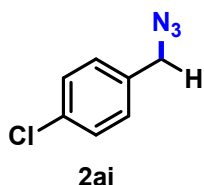

**1-(Azidomethyl)-4-chlorobenzene (2ai):** According to **General Procedure A**, 4-chlorobenzaldehyde-derived *N*-trifosylhydrazone **1ai** (113.0 mg, 0.3 mmol) afforded **2ai** (47.3 mg, 94%) as a colorless oil;  $^1\text{H NMR}$  (600 MHz,  $\text{CDCl}_3$ )  $\delta$  7.29 (d,  $J = 8.4$  Hz, 2H), 7.18 (d,  $J = 8.4$  Hz, 2H), 4.25 (s, 2H).  $^{13}\text{C NMR}$  (150 MHz,  $\text{CDCl}_3$ )  $\delta$  134.2, 133.9, 129.5, 129.0, 54.0.

Spectroscopic data in agreement with those reported in *Org. Biomol. Chem.* **2013**, *11*, 1463.

---

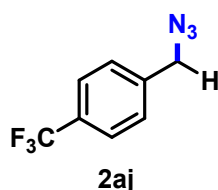

**1-(Azidomethyl)-4-(trifluoromethyl)benzene (2aj):** According to **General Procedure A**, 4-(trifluoromethyl)benzaldehyde-derived *N*-trifosylhydrazone **1aj** (123.1 mg, 0.3 mmol) afforded **2aj** (50.7 mg, 84%) as a colorless oil;  $^1\text{H NMR}$  (600 MHz,  $\text{CDCl}_3$ )  $\delta$  7.64 (d,  $J = 8.4$  Hz, 2H), 7.44 (d,  $J = 8.4$  Hz, 2H), 4.42 (s, 2H).  $^{13}\text{C NMR}$  (150 MHz,  $\text{CDCl}_3$ )  $\delta$  139.4, 130.5 (q,  $J = 32.4$  Hz), 128.2, 125.8 (q,  $J = 3.5$  Hz), 124.0 (q,  $J = 270$  Hz), 54.1.  $^{19}\text{F NMR}$  (470 MHz,  $\text{CDCl}_3$ )  $\delta$  -62.8 (s).

Spectroscopic data in agreement with those reported in *Org. Lett.* 2020, **22**, 5099–5013.

---

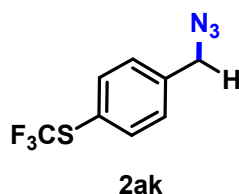

**(4-(Azidomethyl)phenyl)(trifluoromethyl)sulfane (2ak):** According to **General Procedure A**, 4-((trifluoromethyl)thio)benzaldehyde-derived *N*-trifosylhydrazone **1aj** (132.7 mg, 0.3 mmol) afforded **2ak** (41.3 mg, 59%) as a colorless oil;  $^1\text{H NMR}$  (600 MHz,  $\text{CDCl}_3$ )  $\delta$  7.67 (d,  $J = 9.6$  Hz, 2H), 7.38 (d,  $J = 9.6$  Hz, 2H), 4.41 (s, 2H).  $^{13}\text{C NMR}$  (150 MHz,  $\text{CDCl}_3$ )  $\delta$  138.6, 136.7, 129.5 (q,  $J = 306.0$  Hz), 128.9, 124.3 (d,  $J = 1.5$  Hz), 54.1;  $^{19}\text{F NMR}$  (470 MHz,  $\text{CDCl}_3$ )  $\delta$  -42.6 (s).

Spectroscopic data in agreement with those reported in *J. Am. Chem. Soc.* 2021, **143**, 16302–16310.

---

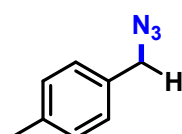

**2al**

**1-(Azidomethyl)-4-methylbenzene (2al):** According to **General Procedure A**, 4-methylbenzaldehyde-derived *N*-trifosylhydrazone **1al** (106.9 mg, 0.3 mmol) afforded **2al** (40.6 mg, 92%) as a colorless oil;  $^1\text{H NMR}$  (600 MHz,  $\text{CDCl}_3$ )  $\delta$  7.21–7.18 (m, 4H), 4.38 (s, 2H), 2.36 (s, 3H);  $^{13}\text{C NMR}$  (150 MHz,  $\text{CDCl}_3$ )  $\delta$  138.1, 132.3, 129.5, 128.2, 54.6, 21.1.

Spectroscopic data in agreement with those reported in *Org. Lett.* 2016, **18**, 1646–1649.

---

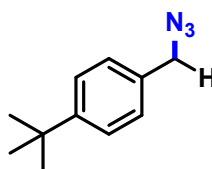

**2am**

**1-(Azidomethyl)-4-(tert-butyl)benzene (2am):** According to **General Procedure A**, 4-(tert-butyl)benzaldehyde-derived *N*-trifosylhydrazone **1am** (119.5 mg, 0.3 mmol) afforded **2am** (50.5 mg, 89%) as a colorless oil;  $^1\text{H NMR}$  (600 MHz,  $\text{CDCl}_3$ )  $\delta$  7.40 (d,  $J = 9.6$  Hz, 2H), 7.24 (d,  $J = 9.6$  Hz, 2H), 4.29 (s, 2H), 1.32 (s, 9H);  $^{13}\text{C NMR}$  (150 MHz,  $\text{CDCl}_3$ )  $\delta$  151.3, 132.4, 128.0, 125.7, 54.5, 34.6, 31.2.

Spectroscopic data in agreement with those reported in *Angew. Chem. Int. Ed.* 2014, **53**, 6914–6919.

---

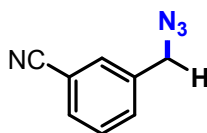

**2an**

**3-(Azidomethyl)benzonitrile (2an):** According to **General Procedure A**, 3-formylbenzonitrile-derived *N*-trifosylhydrazone **1an** (110.2 mg, 0.3 mmol) afforded **2an** (28.5 mg, 60%) as a colorless oil;  $^1\text{H NMR}$  (600 MHz,  $\text{CDCl}_3$ )  $\delta$  7.55-7.53 (m, 2H), 7.50-7.48 (m, 1H), 7.44-7.41 (m, 1H), 4.35 (s, 2H).  $^{13}\text{C NMR}$  (150 MHz,  $\text{CDCl}_3$ )  $\delta$  137.0, 132.1, 131.7, 131.2, 129.5, 118.2, 112.8, 53.5.

Spectroscopic data in agreement with those reported in *Green Chem.* 2018, **20**, 4418–4422.

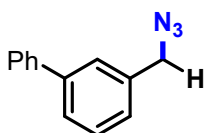

**2ao**

**3-(Azidomethyl)-1,1'-biphenyl (2ao):** According to **General Procedure A**, [1,1'-biphenyl]-3-carbaldehyde-derived *N*-trifosylhydrazone **1ao** (125.5 mg, 0.3 mmol) afforded **2ao** (45.8mg, 73%) as a colorless oil;  $^1\text{H NMR}$  (600 MHz,  $\text{CDCl}_3$ )  $\delta$  7.70 (d,  $J = 9.6$  Hz, 2H), 7.67-7.63 (m, 2H), 7.56 -7.52 (m, 3H), 7.48-7.45 (m, 1H), 7.38 (d,  $J = 9.0$  Hz, 1H), 4.45 (s, 2H).  $^{13}\text{C NMR}$  (150 MHz,  $\text{CDCl}_3$ )  $\delta$  141.8, 140.5, 135.8, 129.2, 128.7, 127.5, 127.1, 127.0, 126.9, 126.8, 54.7.

Spectroscopic data in agreement with those reported in *Angew. Chem. Int. Ed.* 2010, **49**, 6817 –6820

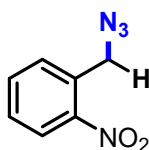

**2ap**

**1-(Azidomethyl)-2-nitrobenzene (2ap):** According to **General Procedure A**, 2-nitrobenzaldehyde-derived *N*-trifosylhydrazone **1ap** (116.2 mg, 0.3 mmol) afforded **2ap** (29.4 mg, 55%) as a colorless oil  $^1\text{H NMR}$  (600 MHz,  $\text{CDCl}_3$ )  $\delta$  8.12 (d,  $J = 10.2$  Hz, 1H), 7.71-7.66 (m, 2H), 7.54 -7.50 (m, 1H), 4.85 (s, 2H);  $^{13}\text{C NMR}$  (150 MHz,  $\text{CDCl}_3$ )  $\delta$  147.7, 134.0, 131.6, 130.1, 129.0, 125.3, 52.0.

Spectroscopic data in agreement with those reported in *Green Chem.* 2021, **23**, 7499–

7505.

---

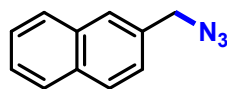

**2aq**

**(Aidomethyl)benzene (2aq):** According to **General Procedure A**, 2-naphthaldehyde-derived *N*-trifosylhydrazone **1aq** (117.7 mg, 0.3 mmol) afforded **2aq** (43.9 mg, 80%) as a white solid;  $^1\text{H NMR}$  (600 MHz,  $\text{CDCl}_3$ )  $\delta$  7.87-7.83 (m, 3H), 7.76 (s, 1H), 7.52-7.48 (m, 2H), 7.44 (dd,  $J = 8.4, 1.8$  Hz, 1H), 4.49 (s, 2H);  $^{13}\text{C NMR}$  (150 MHz,  $\text{CDCl}_3$ )  $\delta$  133.2, 133.1, 132.8, 128.8, 127.9, 127.7, 127.2, 126.5, 126.3, 125.8, 55.0.

Spectroscopic data in agreement with those reported in *Green Chem.* 2021, **23**, 7499–7505.

---

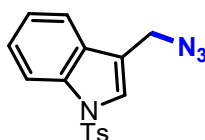

**2ar**

**3-(Aidomethyl)-1-tosyl-1H-indole (2ar):** According to **General Procedure A**, 1-tosyl-1H-indole-3-carbaldehyde-derived *N*-trifosylhydrazone **1ar** (156.4 mg, 0.3 mmol) afforded **2ar** (90.0 mg, 92%) as a white solid;  $^1\text{H NMR}$  (600 MHz,  $\text{CDCl}_3$ )  $\delta$  7.99 (d,  $J = 8.4$  Hz, 1H), 7.75 (d,  $J = 7.8$  Hz, 2H), 7.59 (s, 1H), 7.53 (d,  $J = 7.8$  Hz, 1H), 7.34 (t,  $J = 7.8$  Hz, 1H), 7.26 (t,  $J = 7.8$  Hz, 1H), 7.19 (d,  $J = 7.8$  Hz, 2H), 4.43 (s, 2H), 2.30 (s, 3H);  $^{13}\text{C NMR}$  (150 MHz,  $\text{CDCl}_3$ )  $\delta$  145.1, 135.3, 134.8, 129.9, 129.2, 126.7, 125.2, 125.0, 123.5, 119.5, 116.6, 113.7, 45.8, 21.4.

Spectroscopic data in agreement with those reported in *Eur. J. Med. Chem.* 2018, **143**, 1345-1360.

---

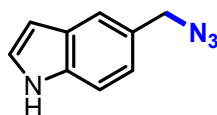

**2as**

**5-(Azidomethyl)-1H-indole (2as):** According to **General Procedure A**, 1H-indole-5-carbaldehyde-derived *N*-trifosylhydrazone **1as** (110.2 mg, 0.3 mmol) afforded **2as** (25.8 mg, 50%) as a white solid;  $^1\text{H NMR}$  (500 MHz,  $\text{CDCl}_3$ )  $\delta$  8.20 (s, 1H), 7.59 (s, 1H), 7.39 (d,  $J = 8.0$  Hz, 1H), 7.23 (t,  $J = 8.0$  Hz, 1H), 7.15 (dd,  $J = 8.0$  Hz,  $J = 2.0$

Hz, 1H), 6.56 (t,  $J = 2.0$  Hz, 1H), 4.41 (s, 2H);  $^{13}\text{C}$  NMR (150 MHz,  $\text{CDCl}_3$ )  $\delta$  135.6, 128.0, 126.7, 124.9, 122.7, 120.9, 111.4, 102.8, 55.6.

---

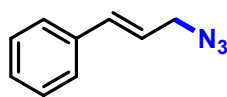

**2at**

**(3-Azidoprop-1-en-1-yl)benzene (2at):** According to **General Procedure A**, cinnamaldehyde-derived *N*-trifosylhydrazone **1at** (106.3 mg, 0.3 mmol) afforded **2at** (19.1 mg, 40%) as a yellow oil;  $^1\text{H}$  NMR (600 MHz,  $\text{CDCl}_3$ )  $\delta$  7.44 (d,  $J = 9.0$  Hz, 2H), 7.38 (t,  $J = 9.0$  Hz, 2H), 7.33-7.30 (m, 1H), 6.68 (d,  $J = 19.2$  Hz, 1H), 6.30-6.24 (m, 1H), 3.96 (d,  $J = 7.8$  Hz, 2H);  $^{13}\text{C}$  NMR (150 MHz,  $\text{CDCl}_3$ )  $\delta$  135.9, 134.4, 128.6, 128.1, 126.6, 122.3, 52.9.

Spectroscopic data in agreement with those reported in *Org. Lett.* 2020, **22**, 5099–5013.

---

### 2.3 Gram-Scale Synthesis and Further Application

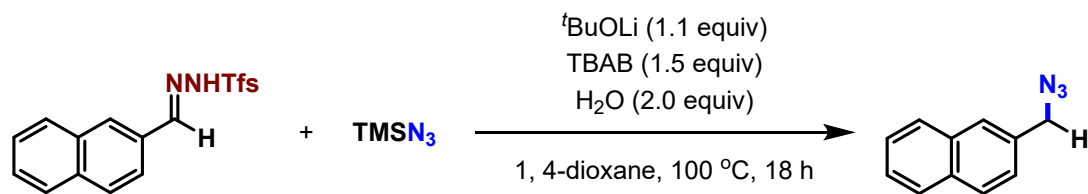

**1aq**, 5.68 g, 15 mmol

**2aq**, 2.19 g, 80%

Following the general procedure **A**: *N*-trifosylhydrazone **1aq** (5.68 g, 15 mmol, 1.0 equiv),  $t\text{BuOLi}$  (1.32 g, 16.5 mmol, 1.1 equiv), TBAB (7.25 g, 22.5 mmol, 1.5 equiv),  $\text{H}_2\text{O}$  (0.54 g, 30 mmol, 2.0 equiv) and  $\text{TMSN}_3$  (3.64 g, 30 mmol, 2.0 equiv) in 1,4-dioxane (120 mL) were used. The reaction mixture was stirred at 100 °C for 26 h. The crude material was purified by flash column chromatography (petroleum ether) to provide **3b** as a colorless oil (2.19 g, 80%).

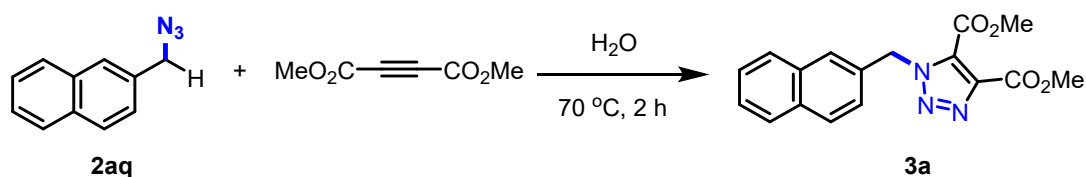

**2aq**

**3a**

A screw capped reaction tube equipped with a magnetic bar was charged with **2aq**

(91.6 mg, 0.5 mmol), dimethyl acetylenedicarboxylate (0.6 mmol) in H<sub>2</sub>O (8 mL) at 70 °C. After work-up, the crude residue was purified by flash column chromatography on silica gel to give **3a** (151.3 mg, 95%) as a yellow oil. <sup>1</sup>H NMR (600 MHz, CDCl<sub>3</sub>) δ 7.81-7.78 (m, 3H), 7.70 (s, 1H), 7.50-7.47 (m, 2H), 7.36-7.34(m, 1H), 5.95 (s, 2H), 3.94 (s, 3H), 3.82 (s, 3H); <sup>13</sup>C NMR (150 MHz, CDCl<sub>3</sub>) δ 160.3, 158.8, 140.2, 133.1, 133.0, 131.2, 129.8, 128.9, 127.9, 127.7, 127.4, 126.7, 126.6, 125.0, 54.0, 53.2, 52.6.

Spectroscopic data in agreement with those reported in *Angew. Chem. Int. Ed.*, 2006, **118**, 1463-1467.

---

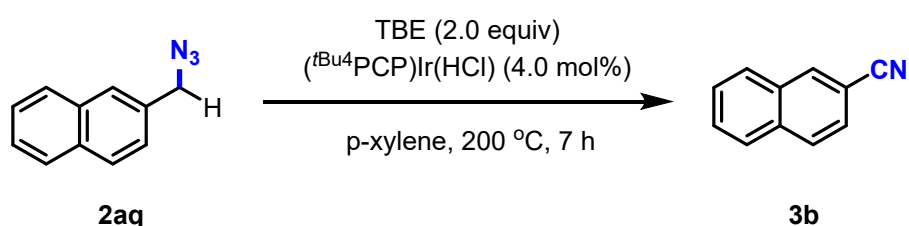

In a glovebox, (tBu<sub>4</sub>PCP)Ir(HCl) (12.4 mg, 4.0 mol%), sodium tBuOK (7.2 mg, 75 μmol, 15.0 mol%) and *p*-xylene (5.0 mL) were added to a 5 mL thick-wall Schlenk tube. The resulting mixture was added *tert*-butyl ethylene (TBE) (128 μL, 1.0 mmol) and azide **2aq** (91.6 mg, 0.5 mmol). The tube was sealed and heated in a preheated oil-bath at 200 °C for 7 h. After work-up, the crude residue was purified by flash column chromatography on silica gel to give **3b** (51.3 mg, 67%) as a yellow oil. <sup>1</sup>H NMR (600 MHz, CDCl<sub>3</sub>) δ 8.21 (s, 1H), 7.89 (dd, *J* = 13.2, 8.4 Hz, 3H), 7.65 -7.62 (m, 1H), 7.61-7.58 (m, 2H). <sup>13</sup>C NMR (150 MHz, CDCl<sub>3</sub>) δ 134.6, 134.1, 132.2, 129.1, 129.0, 128.4, 128.0, 127.6, 126.3, 119.2, 109.3.

Spectroscopic data in agreement with those reported in *ChemCatChem.*, 2020, **12**, 3661-3665.

---

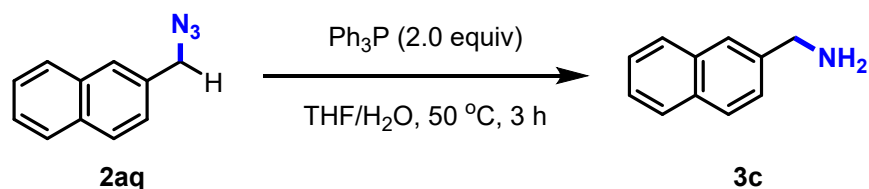

Azide **2aq** (91.6 mg, 0.5 mmol), PPh<sub>3</sub> (1.0 mmol), H<sub>2</sub>O (200 μL) in THF (2.0 ml) at 50 °C for 3h. After work-up, the crude residue was purified by flash column chromatography on silica gel (petroleum ether) to give **3c** (68.4 mg, 87%) as a yellow oil. <sup>1</sup>H NMR (600 MHz, CDCl<sub>3</sub>) δ 7.82 (d, *J* = 8.4 Hz, 3H), 7.75 (s, 1H), 7.49-

7.47 (m, 3H), 4.04 (s, 1H).  $^{13}\text{C}$  NMR (150 MHz,  $\text{CDCl}_3$ )  $\delta$  140.7, 133.5, 132.5, 128.2, 127.7, 127.6, 126.1, 46.6.

Spectroscopic data in agreement with those reported in *Synlett* 2006, 7, 1047-1050.

---

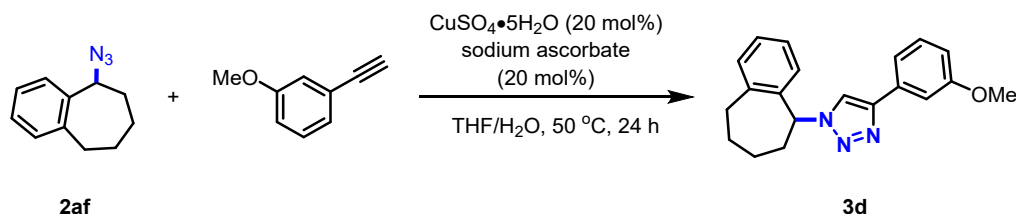

A 15 mL Schlenk tube was charged with **2af** (91.6 mg, 0.5 mmol), 1-ethynyl-3-methoxybenzene (79.3 mg, 1.2 equiv) and THF (1 mL). To the solution was added 20.0 mol%  $\text{CuSO}_4 \cdot 5\text{H}_2\text{O}$  (25 mg, 20 mol%), sodium ascorbate (19.8 mg, 20 mol%) and  $\text{H}_2\text{O}$  (1 mL) sequentially at room temperature (25 °C). After vigorous stirring under nitrogen gas for 12 hours, 10 mL of water was added to the reaction mixture and organic layer was separated from extraction with ethyl acetate (20 mL) three times. The crude mixture was purified by flash column chromatography to afford **3d** (138.9 mg 87%) as a white solid.  $^1\text{H}$  NMR (600 MHz,  $\text{CDCl}_3$ )  $\delta$  7.69 (s, 1H), 7.49 (d,  $J = 1.8$  Hz, 1H), 7.38 (d,  $J = 7.2$  Hz, 1H), 7.32 (t,  $J = 7.8$  Hz, 1H), 7.23-7.19 (m, 2H), 7.12-7.09 (m, 1H), 6.90-6.88 (m, 1H), 6.43 (d,  $J = 6.6$  Hz, 1H), 5.90 (d,  $J = 9.6$  Hz, 1H), 3.88 (s, 3H), 2.92-2.79 (m, 2H), 2.57-2.39 (m, 2H), 2.10-1.89 (m, 3H), 1.61-1.56 (m, 2H).  $^{13}\text{C}$  NMR (150 MHz,  $\text{CDCl}_3$ )  $\delta$  160.1, 147.4, 141.0, 139.7, 132.0, 130.2, 129.8, 128.2, 126.8, 125.8, 119.7, 118.1, 114.3, 110.7, 64.9, 55.4, 36.0, 33.7, 29.7, 28.6, 27.0.

Spectroscopic data in agreement with those reported in literature. *Bioorg. Med. Chem. Lett.* 2016, 26, 4292-4295.

---

## 4. Mechanistic Studies

### 4.1 Deuterium Labelling Study

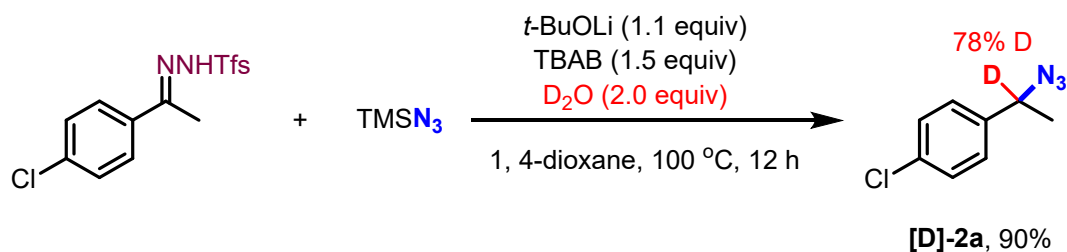

Following the general procedure A: *N*-triftosylhydrazone **1a** (5.68 g, 0.3 mmol), <sup>t</sup>BuOLi (26.4 mg, 0.33 mmol, 1.1 equiv), TBAB (145.1 mg, 0.45 mmol, 1.5 equiv), D<sub>2</sub>O (12 mg, 0.6 mmol, 2.0 equiv) and TMSN<sub>3</sub> (75.8 g, 0.6 mmol, 2.0 equiv) in 1,4-dioxane (4 mL) were used. The reaction mixture was stirred at 100 °C for 12 h. The crude material was purified by flash column chromatography (petroleum ether) to provide [**d**]-**2a** (49.3 mg, 90%).

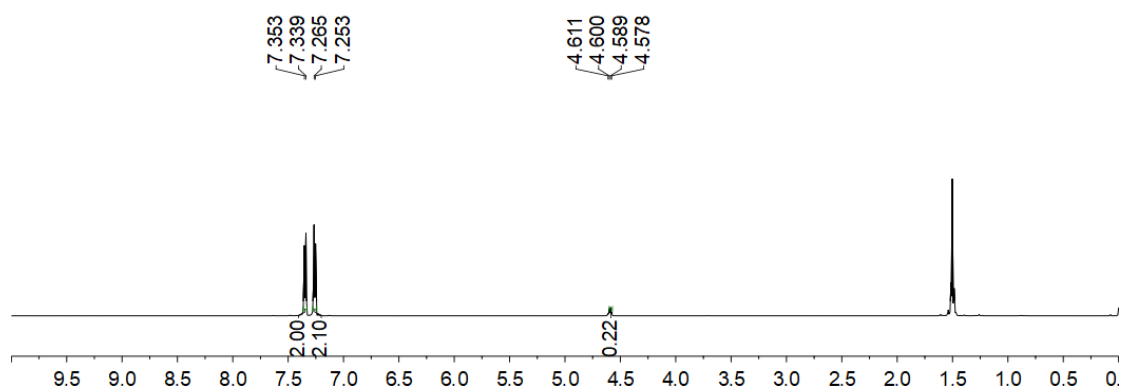

Fig. S1 Deuterium validation experiment.

### 4.2 Computational Method.

All calculations were performed using Gaussian 16 program package<sup>[1]</sup> using the B3LYP functional<sup>[2,3]</sup> and GD3BJ empirical dispersion<sup>[4]</sup>. All the other atoms C, H, O, N, S and Cl were described with 6-31G(d,p) basis set<sup>[5,6]</sup>. The nature of the extrema (minimum) was established with analytical frequencies calculations and geometry optimizations were computed without any symmetry constrained in solvent (1,4-dioxane) by using the SMD<sup>[7]</sup> solvation model. Intrinsic reaction coordinate (IRC)<sup>[8,9]</sup> calculations were carried out to ascertain the true nature of the transition states.



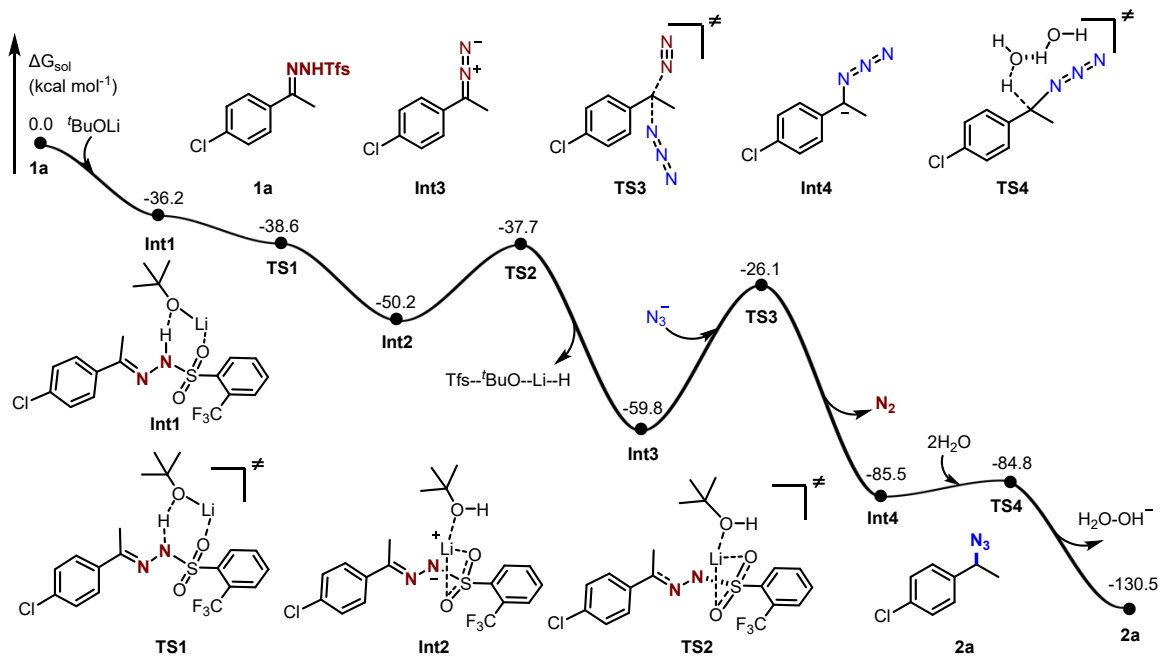

**Fig. S2** Plausible mechanism based on DFT-computed free-energy profile at the SMD (1,4-dioxane)//B3LYP/6-31G(d,p) level of theory ( $\Delta G$ , in  $\text{kcal}\cdot\text{mol}^{-1}$ ).

### Int1

|                                              |                             |  |  |
|----------------------------------------------|-----------------------------|--|--|
| Zero-point correction=                       | 0.377987 (Hartree/Particle) |  |  |
| Thermal correction to Energy=                | 0.407887                    |  |  |
| Thermal correction to Enthalpy=              | 0.408831                    |  |  |
| Thermal correction to Gibbs Free Energy=     | 0.313085                    |  |  |
| Sum of electronic and zero-point Energies=   | -2237.105303                |  |  |
| Sum of electronic and thermal Energies=      | -2237.075403                |  |  |
| Sum of electronic and thermal Enthalpies=    | -2237.074459                |  |  |
| Sum of electronic and thermal Free Energies= | -2237.170205                |  |  |

|   |             |             |             |
|---|-------------|-------------|-------------|
| C | 5.21150300  | 0.09286200  | -0.21685500 |
| C | 3.84117600  | 0.30466000  | -0.11997400 |
| C | 2.97986500  | -0.71108000 | 0.33436200  |
| C | 3.53587400  | -1.95364700 | 0.67385600  |
| C | 4.90875300  | -2.18372100 | 0.57063300  |
| C | 5.73681800  | -1.15491500 | 0.12987100  |
| H | 5.87068000  | 0.88373100  | -0.55912000 |
| H | 3.41880500  | 1.26405000  | -0.39631000 |
| H | 2.89978900  | -2.76666300 | 1.00713800  |
| H | 5.32796400  | -3.15072400 | 0.82739500  |
| N | 1.08613100  | 0.58951400  | -0.15521000 |
| N | -0.28031700 | 0.89896200  | -0.09565600 |
| C | -2.75140700 | 0.50439200  | 1.39479100  |
| C | -3.69516400 | 0.33406800  | 2.40642400  |

|    |             |             |             |
|----|-------------|-------------|-------------|
| C  | -4.51306500 | -0.79419800 | 2.40740400  |
| C  | -4.39747400 | -1.73674100 | 1.38635500  |
| C  | -3.46637300 | -1.57440100 | 0.35382600  |
| C  | -2.62611000 | -0.44625000 | 0.37884600  |
| H  | -3.78036500 | 1.08050200  | 3.19038800  |
| H  | -5.24436000 | -0.94419500 | 3.19577900  |
| H  | -5.04143000 | -2.60785800 | 1.38120000  |
| S  | -1.38797200 | -0.06344100 | -0.89808600 |
| O  | -2.13425900 | 0.81303100  | -1.85552600 |
| O  | -0.76812700 | -1.28259400 | -1.40233300 |
| C  | -3.41987200 | -2.64270000 | -0.72244400 |
| F  | -4.52231000 | -3.43603000 | -0.66970600 |
| F  | -3.38560400 | -2.11816800 | -1.96439300 |
| F  | -2.35517800 | -3.46394300 | -0.57965500 |
| H  | -2.09642900 | 1.36836500  | 1.39702500  |
| Cl | 7.46639600  | -1.42865800 | 0.00453600  |
| C  | 1.51707000  | -0.47339800 | 0.43765500  |
| C  | 0.67622600  | -1.43180700 | 1.23805200  |
| H  | -0.23375700 | -0.93387700 | 1.58010300  |
| H  | 0.37939000  | -2.30157000 | 0.64217900  |
| H  | 1.22732100  | -1.78144000 | 2.11563900  |
| H  | -0.45295700 | 1.94775500  | -0.35829300 |
| C  | -0.34129700 | 4.39793800  | -0.06922800 |
| C  | -0.58155300 | 4.21464800  | 1.44292100  |
| H  | -1.65914400 | 4.19033600  | 1.64840100  |
| H  | -0.14366000 | 3.26851800  | 1.78431800  |
| H  | -0.13589500 | 5.02687400  | 2.03097100  |
| C  | 1.17238200  | 4.40330100  | -0.35606100 |
| H  | 1.61669000  | 3.44835600  | -0.05248500 |
| H  | 1.34718400  | 4.52891700  | -1.43119400 |
| H  | 1.68678000  | 5.21322800  | 0.17715000  |
| C  | -0.96459300 | 5.72543600  | -0.53270000 |
| H  | -0.80667900 | 5.85667800  | -1.61057800 |
| H  | -2.04494700 | 5.72098700  | -0.34047500 |
| H  | -0.52662600 | 6.58857400  | -0.01523800 |
| O  | -0.94420400 | 3.33797600  | -0.76480700 |
| Li | -1.92208100 | 2.65055100  | -1.96231100 |

## TS1

|                                          |                             |
|------------------------------------------|-----------------------------|
| Zero-point correction=                   | 0.375398 (Hartree/Particle) |
| Thermal correction to Energy=            | 0.405559                    |
| Thermal correction to Enthalpy=          | 0.406504                    |
| Thermal correction to Gibbs Free Energy= | 0.310673                    |

|                                              |              |
|----------------------------------------------|--------------|
| Sum of electronic and zero-point Energies=   | -2237.109340 |
| Sum of electronic and thermal Energies=      | -2237.079179 |
| Sum of electronic and thermal Enthalpies=    | -2237.078235 |
| Sum of electronic and thermal Free Energies= | -2237.174066 |

|    |             |             |             |
|----|-------------|-------------|-------------|
| C  | 5.07639900  | -0.33778500 | 0.05208400  |
| C  | 3.72614900  | -0.02244600 | 0.15259300  |
| C  | 2.75279000  | -1.02820500 | 0.29464600  |
| C  | 3.17783300  | -2.36508000 | 0.31961800  |
| C  | 4.52930400  | -2.69722300 | 0.20843400  |
| C  | 5.46925500  | -1.67844600 | 0.07974800  |
| H  | 5.82132300  | 0.44481500  | -0.04741300 |
| H  | 3.40797500  | 1.01329300  | 0.12331200  |
| H  | 2.45383800  | -3.16841200 | 0.40662700  |
| H  | 4.84597900  | -3.73476100 | 0.21913800  |
| N  | 1.00520200  | 0.51300300  | 0.02254600  |
| N  | -0.29852100 | 1.00143300  | 0.07262500  |
| C  | -2.66812300 | 0.43212500  | 1.73366200  |
| C  | -3.55182600 | 0.13592900  | 2.77039800  |
| C  | -4.50070100 | -0.87080200 | 2.60289900  |
| C  | -4.57183200 | -1.56354800 | 1.39472700  |
| C  | -3.70124600 | -1.26873300 | 0.33882600  |
| C  | -2.73098600 | -0.26762600 | 0.52698800  |
| H  | -3.48914900 | 0.68715800  | 3.70391700  |
| H  | -5.18847700 | -1.11940500 | 3.40542700  |
| H  | -5.31605400 | -2.33952600 | 1.26172300  |
| S  | -1.53594400 | 0.26441300  | -0.74415700 |
| O  | -2.27792100 | 1.36911100  | -1.44047500 |
| O  | -1.09499900 | -0.88313900 | -1.53270500 |
| C  | -3.85626100 | -2.06972100 | -0.94033200 |
| F  | -5.04630600 | -2.72821800 | -0.96109500 |
| F  | -3.83120000 | -1.29307600 | -2.04174100 |
| F  | -2.89870900 | -3.01619000 | -1.06727700 |
| H  | -1.90488100 | 1.19304600  | 1.85689600  |
| Cl | 7.17372400  | -2.08235900 | -0.05070700 |
| C  | 1.31052600  | -0.68165300 | 0.40106600  |
| C  | 0.36268900  | -1.70560100 | 0.96830300  |
| H  | -0.49327200 | -1.21098400 | 1.43109700  |
| H  | -0.02002300 | -2.37986000 | 0.19443000  |
| H  | 0.86293200  | -2.30174300 | 1.73663400  |
| H  | -0.29406700 | 2.17034300  | -0.13066700 |
| C  | 0.67678600  | 4.27883000  | -0.08083200 |
| C  | 1.05228000  | 4.00555200  | 1.38605600  |
| H  | 0.19032100  | 4.19695400  | 2.03629400  |

|    |             |            |             |
|----|-------------|------------|-------------|
| H  | 1.35603200  | 2.96041600 | 1.51409200  |
| H  | 1.88165200  | 4.64478700 | 1.71279500  |
| C  | 1.87012900  | 3.95533200 | -0.99654800 |
| H  | 2.12479700  | 2.89330100 | -0.91480300 |
| H  | 1.61096400  | 4.16390800 | -2.04195400 |
| H  | 2.75380700  | 4.55198200 | -0.73620100 |
| C  | 0.25977700  | 5.74648500 | -0.25036200 |
| H  | -0.02092000 | 5.94278600 | -1.29333500 |
| H  | -0.60348300 | 5.97057700 | 0.38767100  |
| H  | 1.07406100  | 6.43182000 | 0.01555600  |
| O  | -0.42149700 | 3.46082100 | -0.44084000 |
| Li | -1.71157600 | 3.11222000 | -1.52251600 |

## Int2

|                                              |                             |
|----------------------------------------------|-----------------------------|
| Zero-point correction=                       | 0.379220 (Hartree/Particle) |
| Thermal correction to Energy=                | 0.410108                    |
| Thermal correction to Enthalpy=              | 0.411052                    |
| Thermal correction to Gibbs Free Energy=     | 0.314274                    |
| Sum of electronic and zero-point Energies=   | -2237.127615                |
| Sum of electronic and thermal Energies=      | -2237.096728                |
| Sum of electronic and thermal Enthalpies=    | -2237.095783                |
| Sum of electronic and thermal Free Energies= | -2237.192561                |

|   |             |             |             |
|---|-------------|-------------|-------------|
| C | -4.81202400 | -0.04029100 | -0.84644600 |
| C | -3.51246000 | -0.51746100 | -0.71607100 |
| C | -3.21003400 | -1.59390600 | 0.13945600  |
| C | -4.26757500 | -2.19066600 | 0.84574700  |
| C | -5.57739700 | -1.72152200 | 0.72621100  |
| C | -5.83887600 | -0.64589200 | -0.11812400 |
| H | -5.03487200 | 0.78614000  | -1.51392500 |
| H | -2.70650600 | -0.06684300 | -1.28348500 |
| H | -4.07376700 | -3.02368000 | 1.51402400  |
| H | -6.38373400 | -2.18522800 | 1.28498300  |
| N | -0.88693000 | -1.24700500 | -0.06023400 |
| N | 0.41328600  | -1.70341000 | 0.06089700  |
| C | 2.99749600  | -2.72245600 | -0.40405200 |
| C | 4.19137200  | -3.44067700 | -0.45204700 |
| C | 5.40546900  | -2.77824000 | -0.29308400 |
| C | 5.41825100  | -1.39945400 | -0.08885900 |
| C | 4.22957000  | -0.65960400 | -0.03604800 |
| C | 3.00142000  | -1.34320900 | -0.18482700 |
| H | 4.16462000  | -4.51389100 | -0.61611900 |
| H | 6.34370200  | -3.32349400 | -0.32912700 |

|    |             |             |             |
|----|-------------|-------------|-------------|
| H  | 6.36508800  | -0.88787700 | 0.03104900  |
| S  | 1.40941800  | -0.49311700 | -0.21670000 |
| O  | 1.30971700  | 0.23180500  | -1.54254900 |
| O  | 1.46041000  | 0.58912400  | 0.84014300  |
| C  | 4.39092800  | 0.82383900  | 0.23993600  |
| F  | 5.66271500  | 1.23228700  | 0.01769500  |
| F  | 3.62639800  | 1.62778900  | -0.58257900 |
| F  | 4.09466100  | 1.16633300  | 1.50564000  |
| H  | 2.04153300  | -3.21566400 | -0.52304300 |
| Cl | -7.48580200 | -0.04622200 | -0.27984000 |
| C  | -1.81848200 | -2.07391900 | 0.28832400  |
| C  | -1.55908900 | -3.45239600 | 0.84286100  |
| H  | -0.54461900 | -3.76999400 | 0.59654200  |
| H  | -1.64999200 | -3.45943500 | 1.93803900  |
| H  | -2.27362200 | -4.18071500 | 0.44440700  |
| H  | 0.04267400  | 3.47231600  | -1.70087100 |
| C  | -0.70783900 | 3.59591200  | 0.15541400  |
| C  | -1.31831600 | 4.96684500  | -0.13232300 |
| H  | -0.56334600 | 5.75452900  | -0.03936600 |
| H  | -1.74214600 | 5.00604300  | -1.14443900 |
| H  | -2.12986500 | 5.17688800  | 0.57266500  |
| C  | -1.72205600 | 2.46716800  | -0.02752900 |
| H  | -2.14284800 | 2.48343600  | -1.04114000 |
| H  | -1.26648600 | 1.48698700  | 0.14056200  |
| H  | -2.55363400 | 2.58189300  | 0.67640300  |
| C  | -0.05507400 | 3.55025400  | 1.53418200  |
| H  | 0.38733400  | 2.56851700  | 1.72884800  |
| H  | 0.72059800  | 4.31934900  | 1.61911100  |
| H  | -0.81062800 | 3.73762600  | 2.30411900  |
| O  | 0.40043400  | 3.39024900  | -0.80135300 |
| Li | 1.53460800  | 1.90286200  | -0.57081700 |

## TS2

|                                              |                             |
|----------------------------------------------|-----------------------------|
| Zero-point correction=                       | 0.376715 (Hartree/Particle) |
| Thermal correction to Energy=                | 0.407584                    |
| Thermal correction to Enthalpy=              | 0.408528                    |
| Thermal correction to Gibbs Free Energy=     | 0.310333                    |
| Sum of electronic and zero-point Energies=   | -2237.106178                |
| Sum of electronic and thermal Energies=      | -2237.075309                |
| Sum of electronic and thermal Enthalpies=    | -2237.074365                |
| Sum of electronic and thermal Free Energies= | -2237.172559                |

|   |             |             |             |
|---|-------------|-------------|-------------|
| C | -5.37343000 | -0.52029300 | -0.84075800 |
|---|-------------|-------------|-------------|

|    |             |             |             |
|----|-------------|-------------|-------------|
| C  | -4.00314200 | -0.57306500 | -1.06606700 |
| C  | -3.11285300 | -1.04835900 | -0.08104200 |
| C  | -3.65966600 | -1.46286700 | 1.14643300  |
| C  | -5.03447000 | -1.41123200 | 1.38718900  |
| C  | -5.88367900 | -0.94170600 | 0.39027900  |
| H  | -6.04576600 | -0.15872600 | -1.61224200 |
| H  | -3.60005300 | -0.24559300 | -2.01858500 |
| H  | -3.01173200 | -1.81688900 | 1.94135800  |
| H  | -5.43804600 | -1.73009000 | 2.34274800  |
| N  | -1.23078100 | -0.48619300 | -1.39165000 |
| N  | -0.11441500 | -0.21173300 | -1.94511400 |
| C  | 2.43628600  | -2.56379800 | -1.40848700 |
| C  | 3.28226100  | -3.66858900 | -1.29961200 |
| C  | 4.31221500  | -3.65608600 | -0.36113500 |
| C  | 4.50117800  | -2.53805100 | 0.45294800  |
| C  | 3.66463500  | -1.41974000 | 0.34521300  |
| C  | 2.61676800  | -1.44800400 | -0.59428500 |
| H  | 3.13215800  | -4.53136100 | -1.94202900 |
| H  | 4.97443200  | -4.51032900 | -0.25853300 |
| H  | 5.30876700  | -2.53261400 | 1.17590200  |
| S  | 1.41047500  | -0.07861200 | -0.93553600 |
| O  | 2.24294000  | 0.87158100  | -1.76277800 |
| O  | 1.12757000  | 0.56094100  | 0.41116200  |
| C  | 3.93510400  | -0.26721100 | 1.28711700  |
| F  | 5.17169700  | -0.34446800 | 1.82890500  |
| F  | 3.90431400  | 0.96798300  | 0.66262600  |
| F  | 3.06691500  | -0.19992100 | 2.31302600  |
| H  | 1.62327800  | -2.55776800 | -2.13069100 |
| Cl | -7.61842700 | -0.87326800 | 0.68125900  |
| C  | -1.65802100 | -1.08777000 | -0.32341500 |
| C  | -0.75208700 | -1.84044700 | 0.61923500  |
| H  | 0.14100500  | -2.19188000 | 0.09546800  |
| H  | -0.41204000 | -1.23000800 | 1.46414200  |
| H  | -1.26313200 | -2.72708100 | 1.00796600  |
| H  | 1.24111700  | 3.49617700  | -1.65305300 |
| C  | 0.14614900  | 4.06187900  | -0.06616500 |
| C  | -0.07568900 | 5.52080300  | -0.46500300 |
| H  | 0.77716500  | 6.13730700  | -0.16233900 |
| H  | -0.20221200 | 5.61322000  | -1.55063800 |
| H  | -0.97978500 | 5.91564800  | 0.01169500  |
| C  | -1.00224200 | 3.16283700  | -0.52683900 |
| H  | -1.12809900 | 3.20967700  | -1.61571200 |
| H  | -0.82222200 | 2.12228300  | -0.24854000 |
| H  | -1.94244500 | 3.48975500  | -0.06892200 |

|    |             |            |             |
|----|-------------|------------|-------------|
| C  | 0.39678000  | 3.92092500 | 1.43356800  |
| H  | 0.54459200  | 2.87007700 | 1.70645700  |
| H  | 1.27530300  | 4.50248600 | 1.73604400  |
| H  | -0.46671500 | 4.29246000 | 1.99455100  |
| O  | 1.39554300  | 3.60937600 | -0.69910200 |
| Li | 2.27504400  | 2.03639500 | -0.16028100 |

### Int3

|                                              |                             |
|----------------------------------------------|-----------------------------|
| Zero-point correction=                       | 0.144761 (Hartree/Particle) |
| Thermal correction to Energy=                | 0.158067                    |
| Thermal correction to Enthalpy=              | 0.159011                    |
| Thermal correction to Gibbs Free Energy=     | 0.102775                    |
| Sum of electronic and zero-point Energies=   | -1042.944990                |
| Sum of electronic and thermal Energies=      | -1042.931684                |
| Sum of electronic and thermal Enthalpies=    | -1042.930740                |
| Sum of electronic and thermal Free Energies= | -1042.986976                |

|    |             |             |             |
|----|-------------|-------------|-------------|
| C  | 2.32142800  | 1.08952900  | 0.18984500  |
| C  | 1.05074400  | 1.65728300  | 0.14209100  |
| C  | -0.09504800 | 0.86359400  | -0.07470700 |
| C  | 0.07073900  | -0.52594900 | -0.24252100 |
| C  | 1.34232400  | -1.09628100 | -0.19412700 |
| C  | 2.45624100  | -0.28822200 | 0.02047700  |
| H  | 3.19640800  | 1.70957900  | 0.35827500  |
| H  | 0.95432600  | 2.73138600  | 0.27832900  |
| H  | -0.77735100 | -1.18813900 | -0.42854200 |
| H  | 1.44972600  | -2.16808800 | -0.32622500 |
| N  | -1.55638100 | 2.72680700  | -0.01810600 |
| N  | -1.64630300 | 3.87420600  | 0.08169700  |
| Cl | 4.07115300  | -1.01117500 | 0.07960400  |
| C  | -1.44078300 | 1.43938400  | -0.13254700 |
| C  | -2.70517000 | 0.62679800  | -0.29007500 |
| H  | -3.57229100 | 1.28880400  | -0.37331900 |
| H  | -2.65508000 | -0.00414900 | -1.18440800 |
| H  | -2.86660800 | -0.04767700 | 0.56080200  |
| N  | -3.53001800 | -2.37438400 | 1.10997700  |
| N  | -2.88612700 | -2.57890800 | 0.13505400  |
| N  | -2.22997000 | -2.75179900 | -0.84416300 |

### TS3

|                               |                             |
|-------------------------------|-----------------------------|
| Zero-point correction=        | 0.142862 (Hartree/Particle) |
| Thermal correction to Energy= | 0.155932                    |

|                                              |              |
|----------------------------------------------|--------------|
| Thermal correction to Enthalpy=              | 0.156876     |
| Thermal correction to Gibbs Free Energy=     | 0.101035     |
| Sum of electronic and zero-point Energies=   | -1042.891456 |
| Sum of electronic and thermal Energies=      | -1042.878386 |
| Sum of electronic and thermal Enthalpies=    | -1042.877442 |
| Sum of electronic and thermal Free Energies= | -1042.933283 |

|    |             |             |             |
|----|-------------|-------------|-------------|
| C  | -1.97135700 | -1.26993200 | -0.17767700 |
| C  | -0.59468400 | -1.43511700 | -0.04372100 |
| C  | 0.25150300  | -0.34869200 | 0.25376900  |
| C  | -0.34549000 | 0.91916300  | 0.42261900  |
| C  | -1.72335700 | 1.09683300  | 0.29241800  |
| C  | -2.52743100 | -0.00021400 | -0.00276600 |
| H  | -2.60766300 | -2.11779200 | -0.41244800 |
| H  | -0.16010800 | -2.42029500 | -0.16777500 |
| H  | 0.26691500  | 1.78786400  | 0.64102400  |
| H  | -2.16424100 | 2.08077600  | 0.42103500  |
| N  | 2.13871500  | -1.87986500 | 0.06762100  |
| N  | 2.89298700  | -2.32908900 | -0.74538900 |
| Cl | -4.28312800 | 0.21038400  | -0.14098400 |
| C  | 1.73848200  | -0.48437800 | 0.28893900  |
| C  | 2.42268200  | 0.01733600  | 1.55032100  |
| H  | 3.51007700  | -0.04436300 | 1.42384500  |
| H  | 2.15167800  | 1.05734600  | 1.75954900  |
| H  | 2.12454300  | -0.59245100 | 2.40929600  |
| N  | 2.36712300  | 0.51736700  | -0.99715600 |
| N  | 2.42704000  | 1.68785300  | -0.68502300 |
| N  | 2.48697500  | 2.81836000  | -0.38022600 |

#### Int4

|                                              |                             |
|----------------------------------------------|-----------------------------|
| Zero-point correction=                       | 0.184334 (Hartree/Particle) |
| Thermal correction to Energy=                | 0.200270                    |
| Thermal correction to Enthalpy=              | 0.201215                    |
| Thermal correction to Gibbs Free Energy=     | 0.140085                    |
| Sum of electronic and zero-point Energies=   | -1086.303619                |
| Sum of electronic and thermal Energies=      | -1086.287682                |
| Sum of electronic and thermal Enthalpies=    | -1086.286738                |
| Sum of electronic and thermal Free Energies= | -1086.347867                |

|   |             |             |             |
|---|-------------|-------------|-------------|
| C | -2.31074100 | -0.67391200 | -1.03391100 |
| C | -0.94725200 | -0.76721600 | -0.79316700 |
| C | -0.33351100 | -0.18073400 | 0.35669100  |
| C | -1.22247600 | 0.47579400  | 1.26101500  |



|    |             |             |             |
|----|-------------|-------------|-------------|
| C  | -2.59009500 | 0.57626700  | 1.01714800  |
| C  | -3.13550500 | 0.00704000  | -0.13232700 |
| H  | -2.73929100 | -1.13062100 | -1.92224600 |
| H  | -0.31840800 | -1.29708300 | -1.50121600 |
| H  | -0.83248000 | 0.91776200  | 2.17279300  |
| H  | -3.23303700 | 1.08715900  | 1.72926400  |
| Cl | -4.88385900 | 0.12294100  | -0.44014400 |
| C  | 1.08048300  | -0.20955900 | 0.57130300  |
| C  | 1.66347300  | 0.06287500  | 1.93742300  |
| H  | 1.38883400  | -0.69611000 | 2.69803100  |
| H  | 2.75873100  | 0.10818800  | 1.89908500  |
| H  | 1.32966400  | 1.03434200  | 2.32203500  |
| N  | 1.76284300  | -1.20808800 | -0.21829100 |
| N  | 2.95678200  | -1.41412400 | -0.09811900 |
| N  | 4.09149000  | -1.67228300 | -0.06296000 |
| O  | 2.19191600  | 2.00391300  | -0.85812800 |
| H  | 1.68946100  | 1.25018700  | -0.39324000 |
| H  | 2.06151600  | 2.77162200  | -0.28178000 |
| O  | 4.94603600  | 1.28329000  | -0.89739400 |
| H  | 4.00138800  | 1.55765500  | -0.93121000 |
| H  | 4.91154900  | 0.32741500  | -0.71435300 |

#### TS4

|                                              |                             |
|----------------------------------------------|-----------------------------|
| Zero-point correction=                       | 0.180834 (Hartree/Particle) |
| Thermal correction to Energy=                | 0.196630                    |
| Thermal correction to Enthalpy=              | 0.197574                    |
| Thermal correction to Gibbs Free Energy=     | 0.136806                    |
| Sum of electronic and zero-point Energies=   | -1086.302778                |
| Sum of electronic and thermal Energies=      | -1086.286982                |
| Sum of electronic and thermal Enthalpies=    | -1086.286038                |
| Sum of electronic and thermal Free Energies= | -1086.346806                |

|    |            |             |             |
|----|------------|-------------|-------------|
| C  | 2.22018700 | -0.95368500 | -0.80849000 |
| C  | 0.86389200 | -0.63694800 | -0.80130100 |
| C  | 0.34100000 | 0.42873900  | -0.02739400 |
| C  | 1.27737900 | 1.16249100  | 0.74029300  |
| C  | 2.63861000 | 0.85171500  | 0.74734600  |
| C  | 3.10437200 | -0.20700400 | -0.02862200 |
| H  | 2.58509800 | -1.77688400 | -1.41668700 |
| H  | 0.18422500 | -1.22583000 | -1.40909600 |
| H  | 0.94446200 | 1.99529300  | 1.35228600  |
| H  | 3.32825100 | 1.43754100  | 1.34893100  |
| Cl | 4.83706400 | -0.60015000 | -0.03734700 |

|   |             |             |             |
|---|-------------|-------------|-------------|
| C | -1.10473000 | 0.70253200  | 0.03834000  |
| C | -1.52276800 | 2.13379300  | 0.36488300  |
| H | -1.12473800 | 2.88328900  | -0.34175500 |
| H | -2.61692600 | 2.22292700  | 0.36809400  |
| H | -1.19275300 | 2.41610100  | 1.37214600  |
| N | -1.74616000 | 0.22714700  | -1.21596100 |
| N | -2.95895900 | 0.24983000  | -1.32586400 |
| N | -4.09303700 | 0.24456300  | -1.55281400 |
| O | -2.35568900 | -0.79031600 | 1.81235400  |
| H | -1.71281200 | -0.11346300 | 1.04414200  |
| H | -2.50713100 | -0.23703100 | 2.59566900  |
| O | -4.73639800 | -1.78428500 | 0.89941600  |
| H | -3.86766100 | -1.45712600 | 1.26842000  |
| H | -4.83396400 | -1.28604500 | 0.07072900  |

## 2a

|                                              |                             |
|----------------------------------------------|-----------------------------|
| Zero-point correction=                       | 0.184283 (Hartree/Particle) |
| Thermal correction to Energy=                | 0.200390                    |
| Thermal correction to Enthalpy=              | 0.201334                    |
| Thermal correction to Gibbs Free Energy=     | 0.136106                    |
| Sum of electronic and zero-point Energies=   | -1086.288238                |
| Sum of electronic and thermal Energies=      | -1086.272130                |
| Sum of electronic and thermal Enthalpies=    | -1086.271186                |
| Sum of electronic and thermal Free Energies= | -1086.336415                |

|    |            |             |             |
|----|------------|-------------|-------------|
| C  | 4.60011500 | 0.41085000  | -0.17179500 |
| C  | 3.78105800 | -0.69740300 | -0.39319700 |
| C  | 2.38786300 | -0.56279100 | -0.46784100 |
| C  | 1.80992500 | 0.70350300  | -0.30010800 |
| C  | 2.62020300 | 1.82214400  | -0.07799600 |
| C  | 4.00168500 | 1.66164000  | -0.02100600 |
| H  | 5.67936600 | 0.30868000  | -0.11233300 |
| H  | 4.23378900 | -1.68086700 | -0.49703600 |
| H  | 0.71857700 | 0.78213300  | -0.34329500 |
| H  | 2.17626500 | 2.80272700  | 0.06219500  |
| Cl | 5.03519300 | 3.07719100  | 0.25742700  |
| C  | 1.48435900 | -1.75577600 | -0.72089700 |
| C  | 1.71985100 | -2.39927600 | -2.08298700 |
| H  | 2.75151300 | -2.75770700 | -2.19470600 |
| H  | 1.03931700 | -3.24699400 | -2.22197100 |
| H  | 1.52024000 | -1.66027100 | -2.86603000 |
| N  | 1.72621200 | -2.83370200 | 0.30774900  |
| N  | 1.42184100 | -2.54140200 | 1.46244600  |

|   |              |             |             |
|---|--------------|-------------|-------------|
| N | 1.19214300   | -2.37590100 | 2.57253900  |
| O | -14.01891900 | 0.54368400  | -1.33293900 |
| H | 0.43353300   | -1.41069900 | -0.64110700 |
| H | -14.91197500 | 0.46419200  | -1.70189200 |
| O | -14.24683800 | 0.97719500  | 1.24831800  |
| H | -14.19861300 | 0.83836200  | 0.22949500  |
| H | -13.72595400 | 0.24083600  | 1.60321500  |

## 5. NMR Spectra Copies

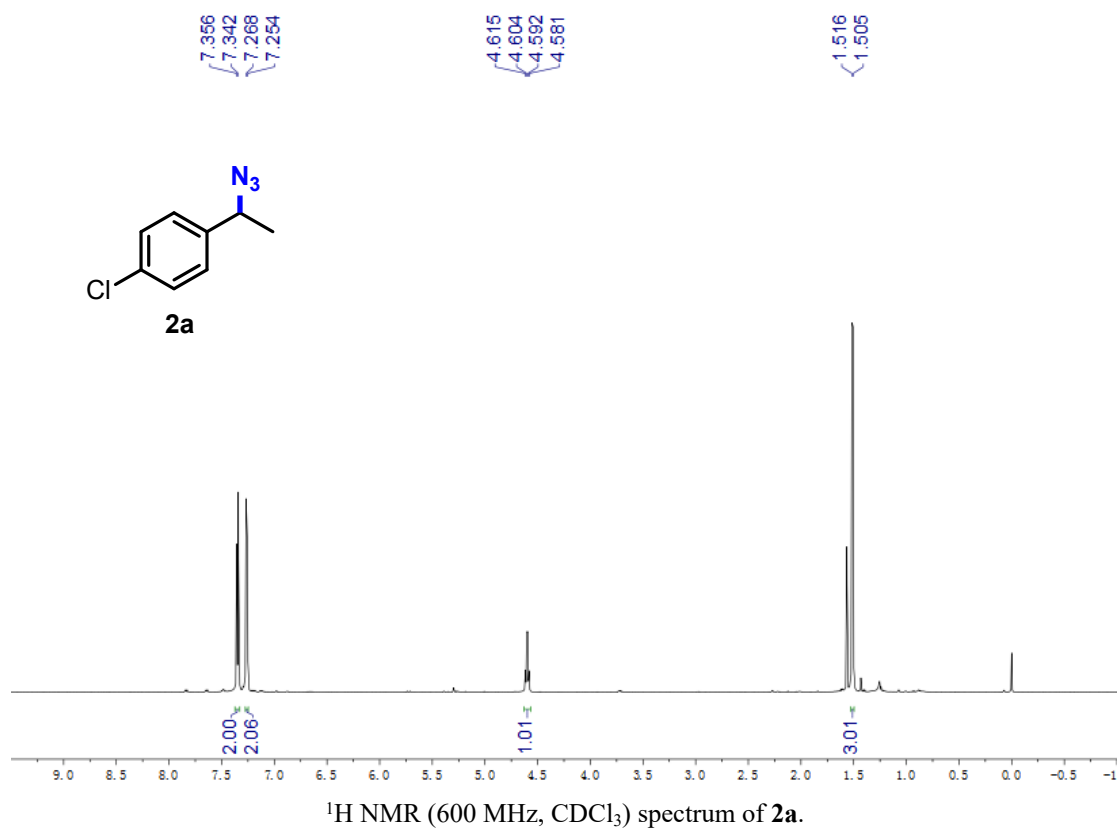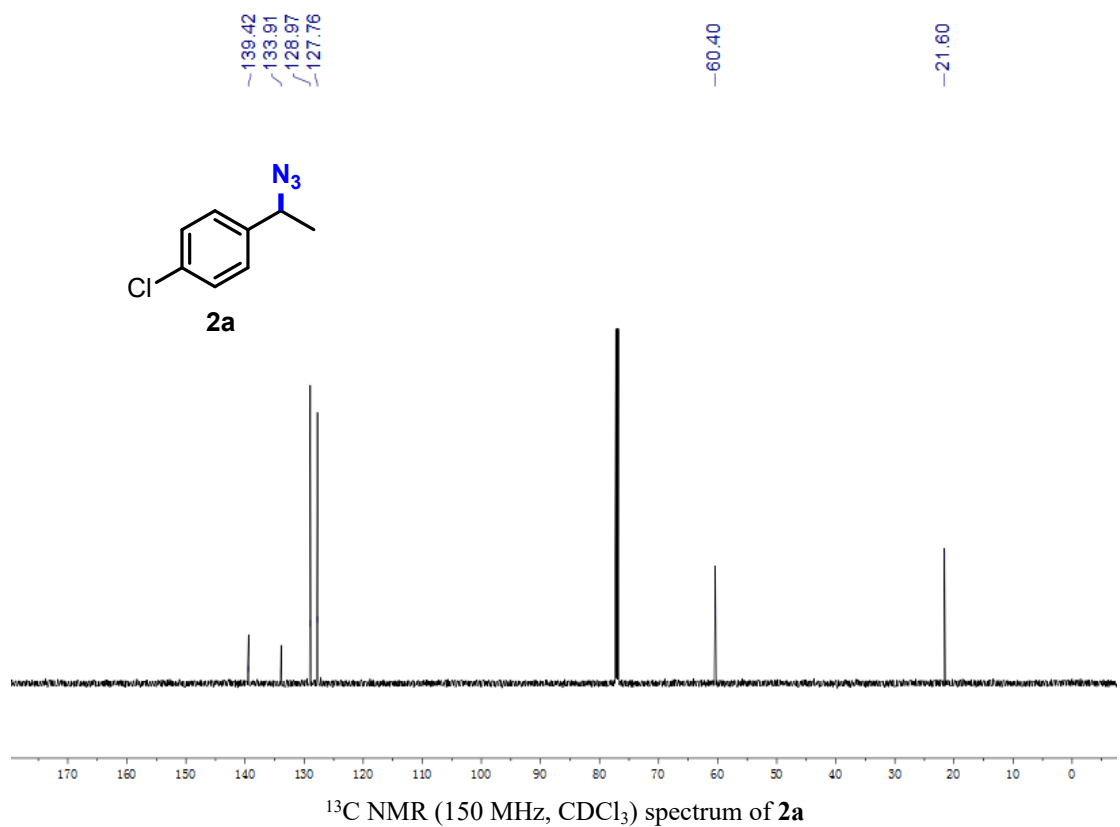

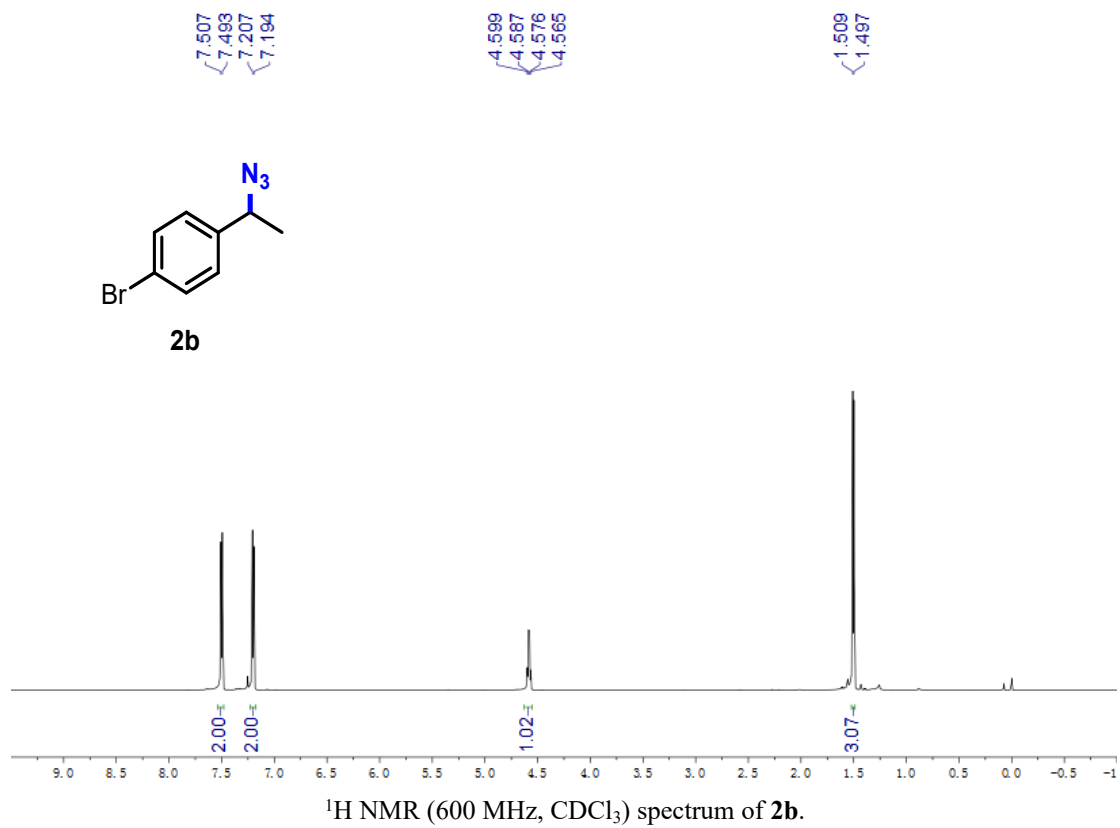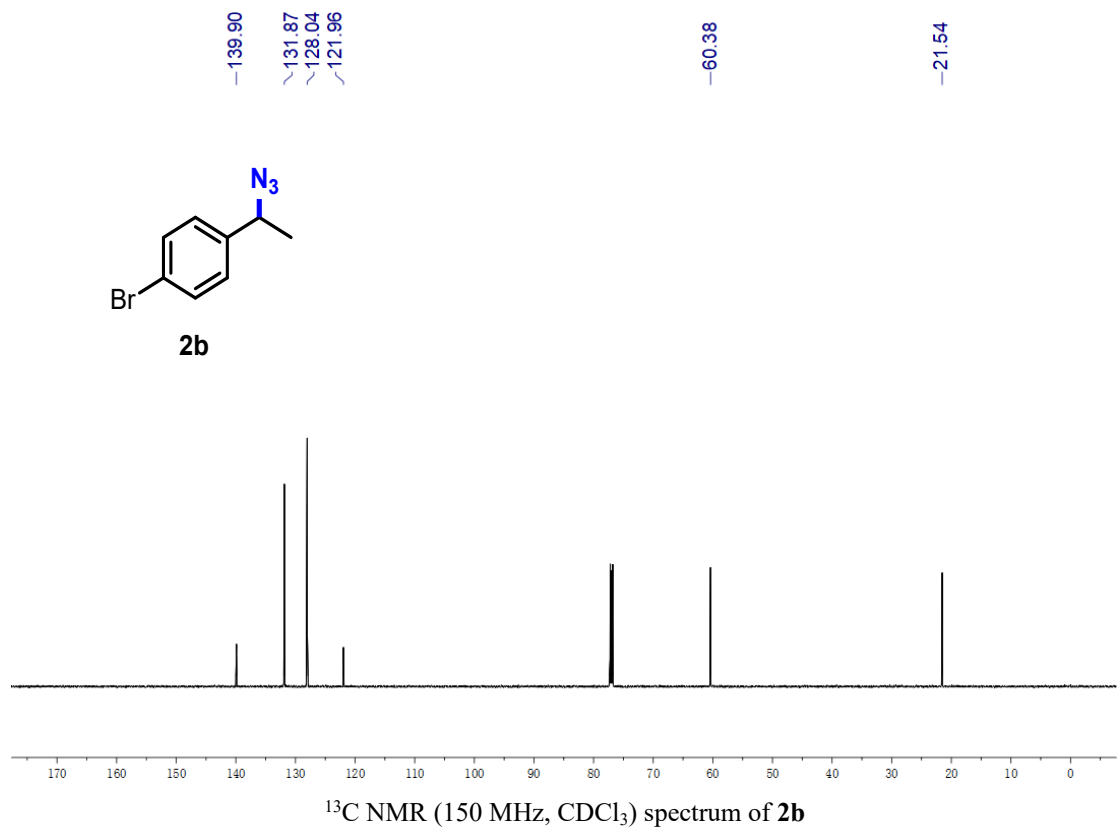

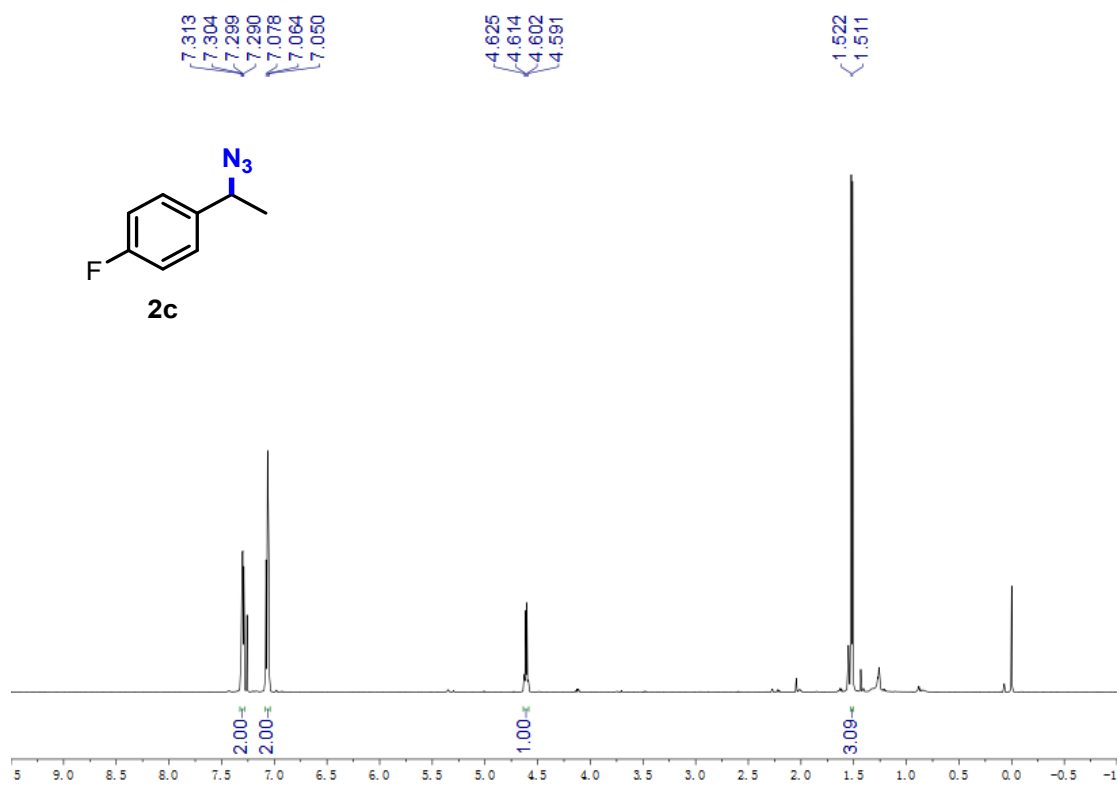

$^1\text{H NMR}$  (600 MHz,  $\text{CDCl}_3$ ) spectrum of **2c**.

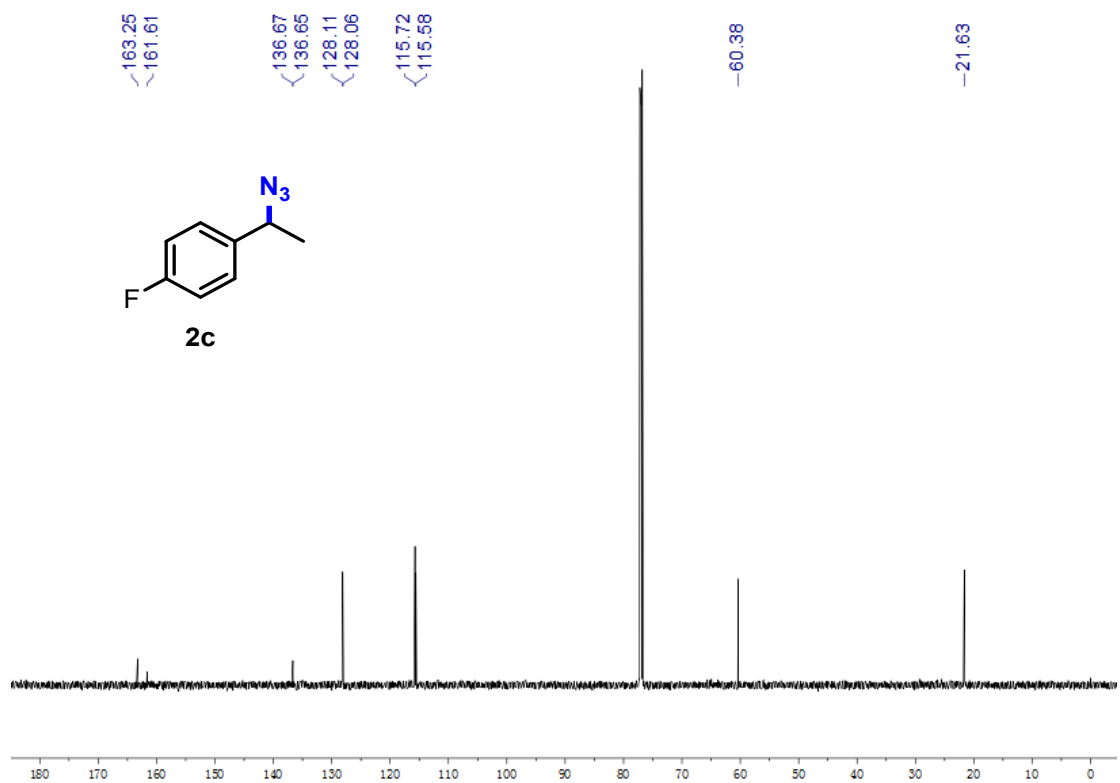

$^{13}\text{C NMR}$  (150 MHz,  $\text{CDCl}_3$ ) spectrum of **2c**.

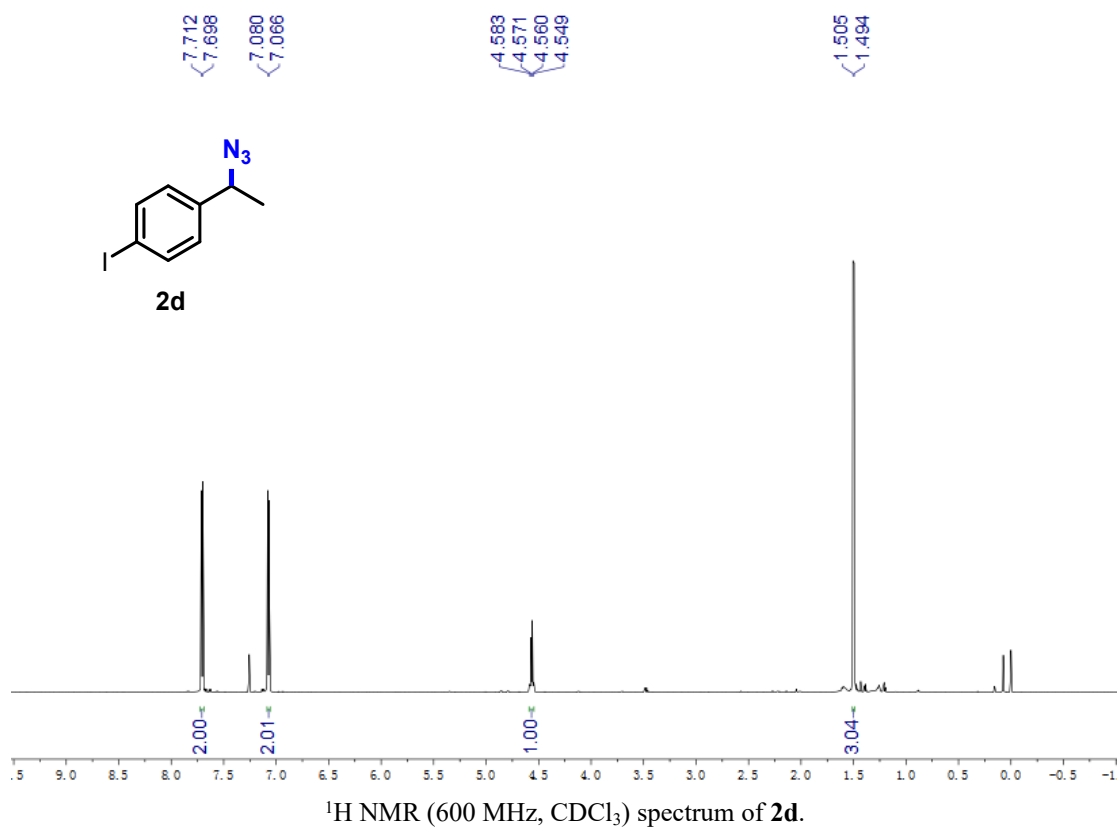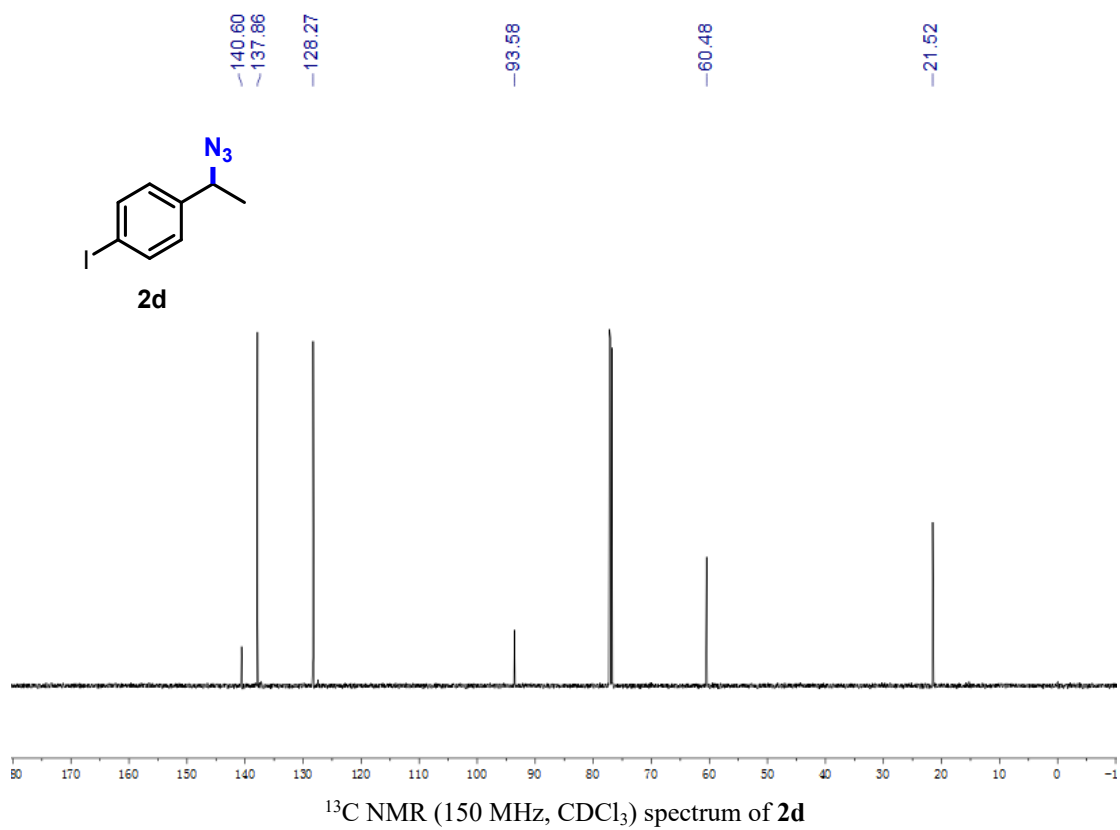

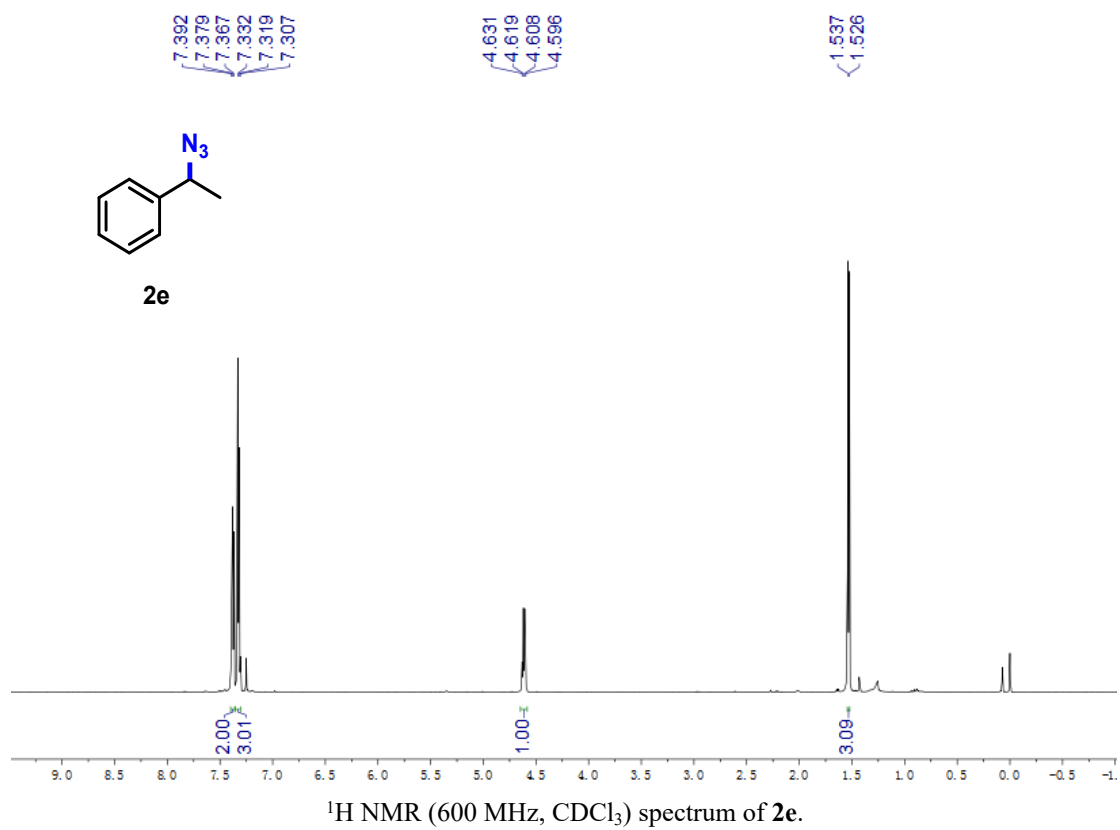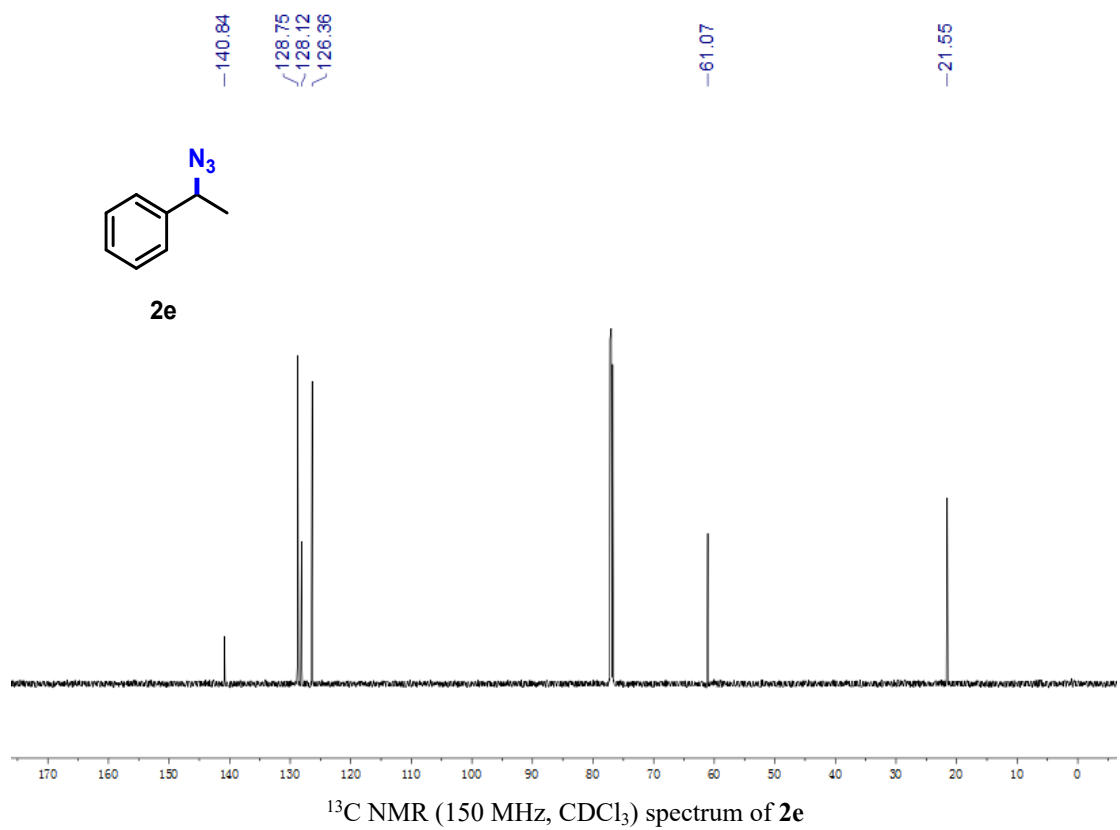



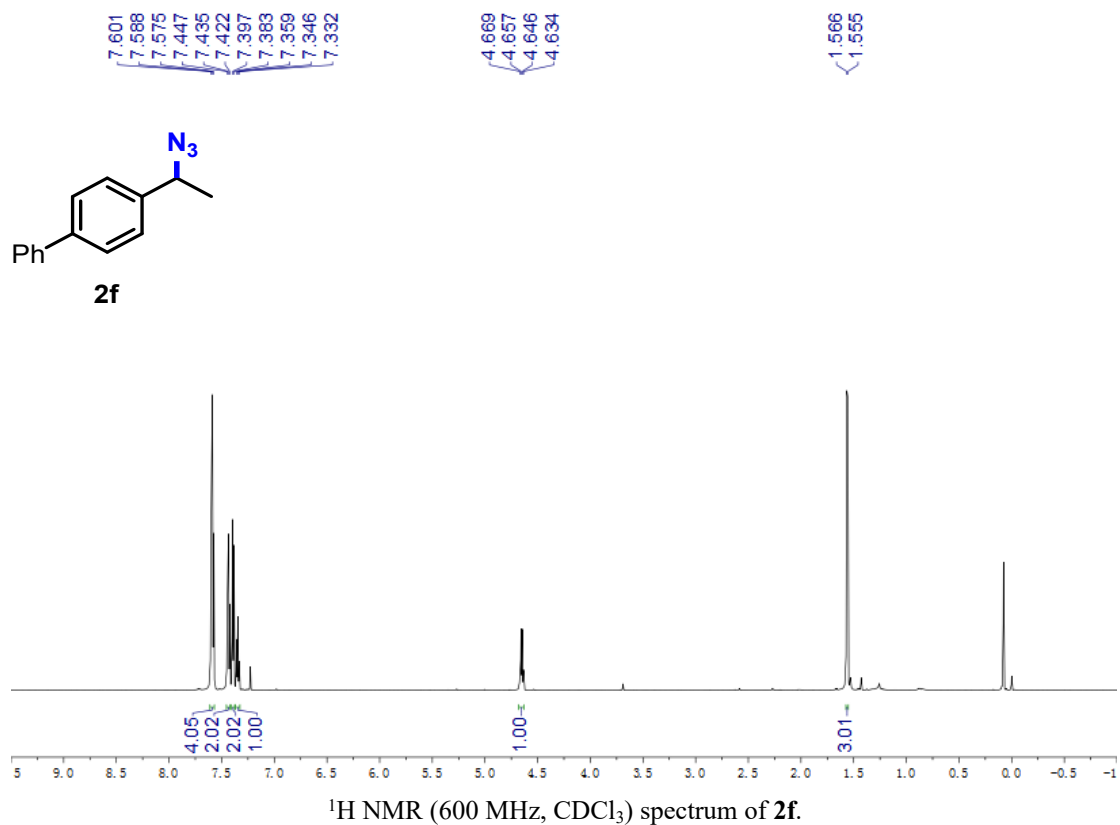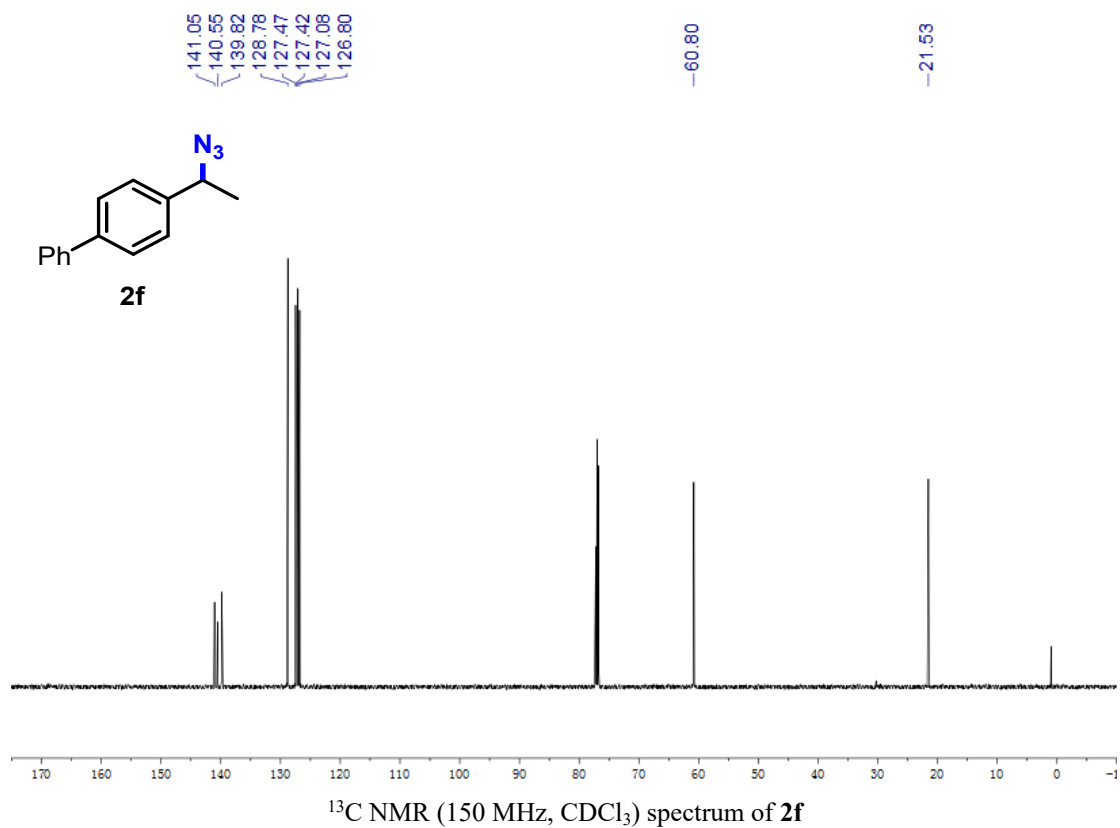

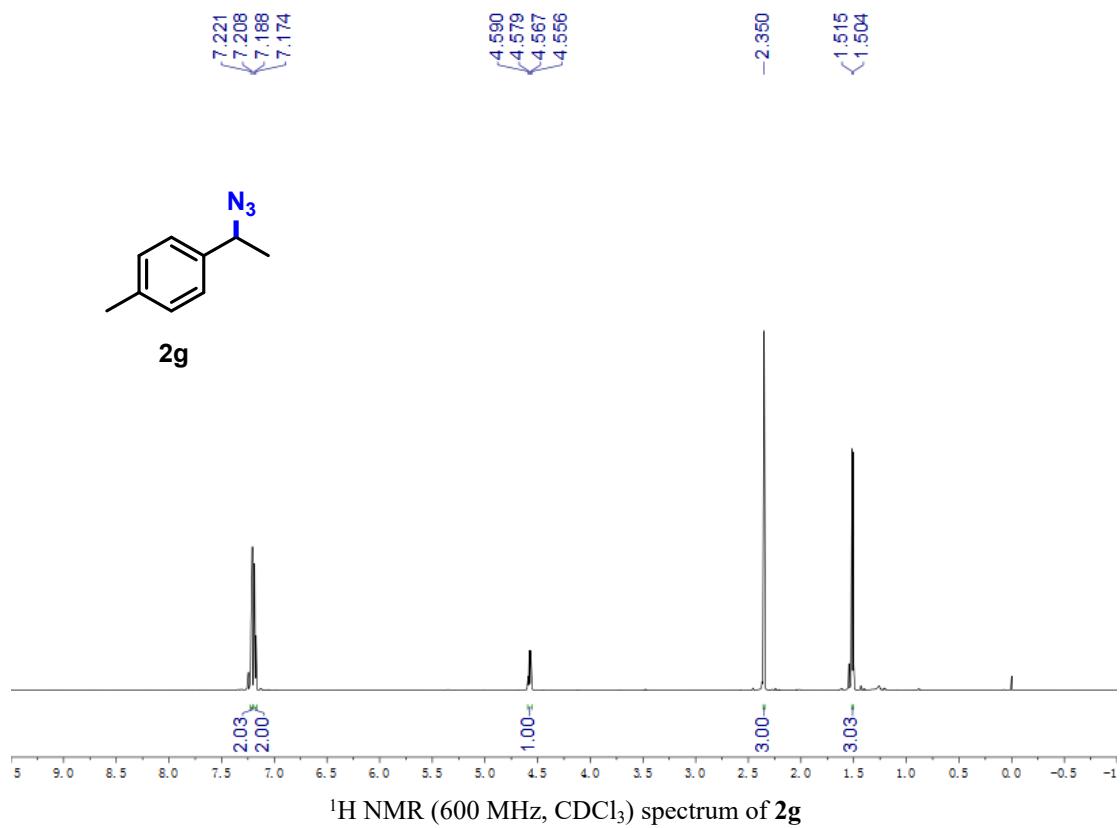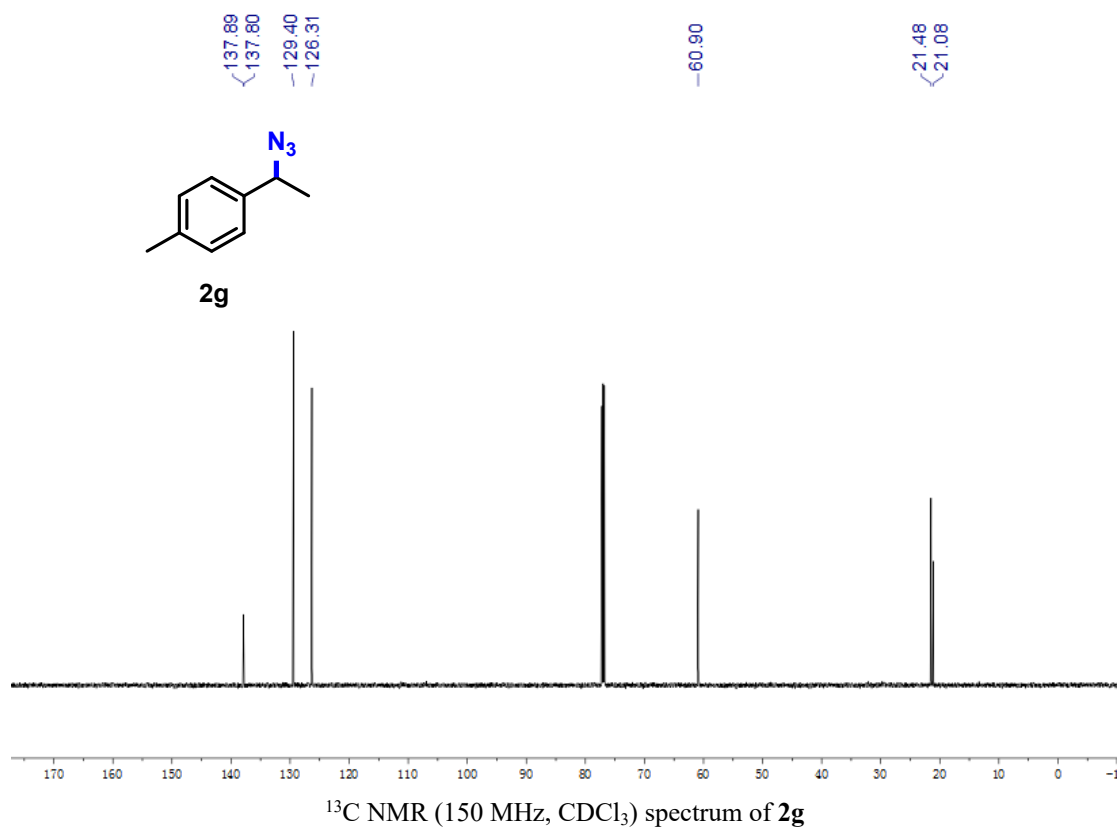

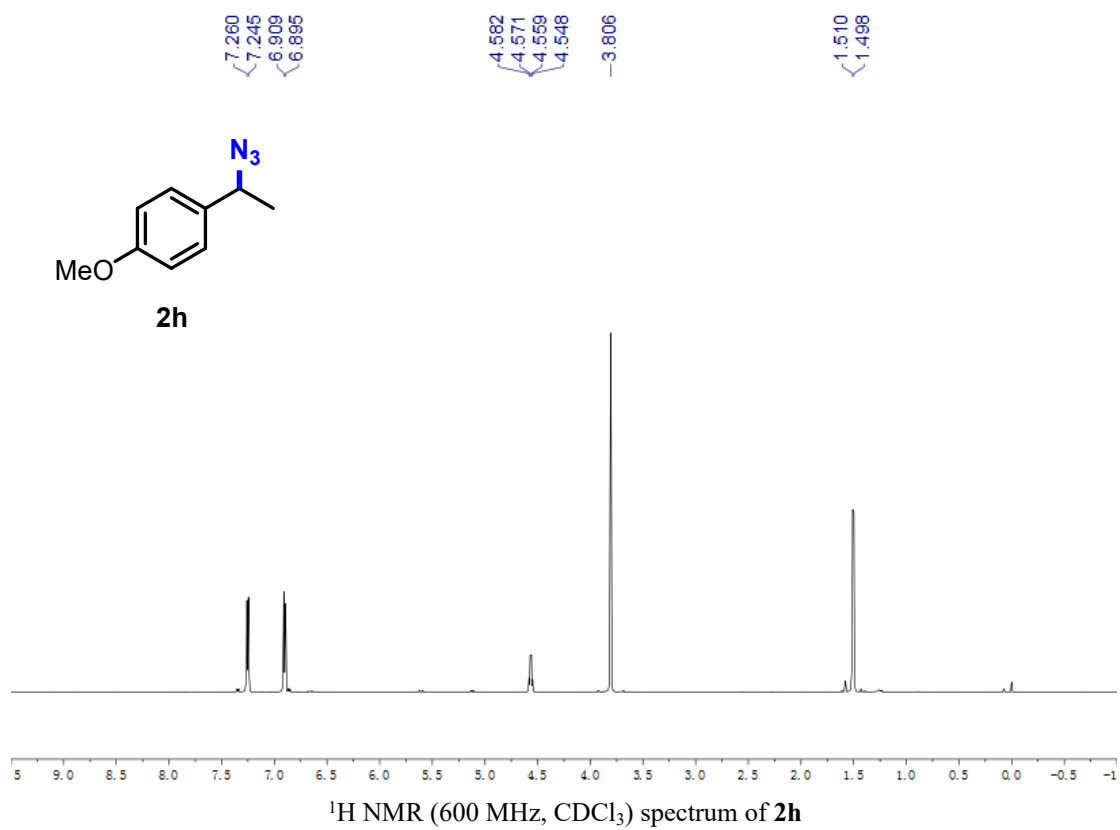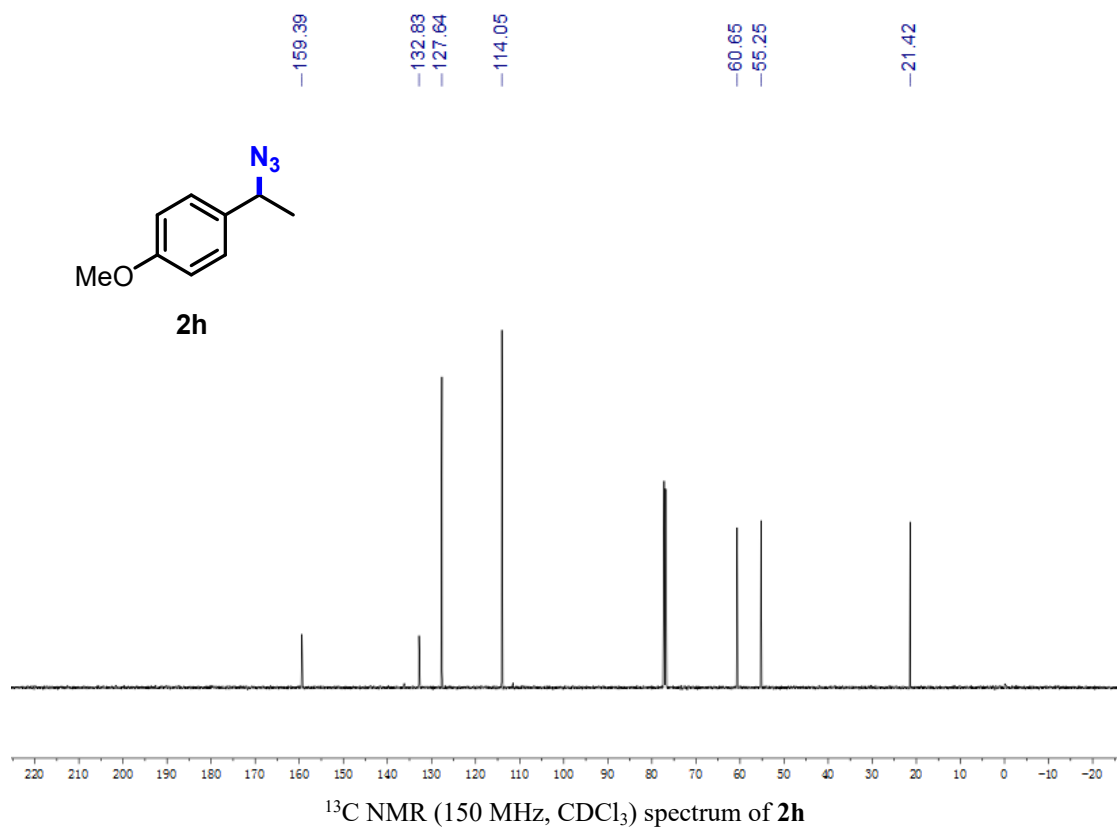

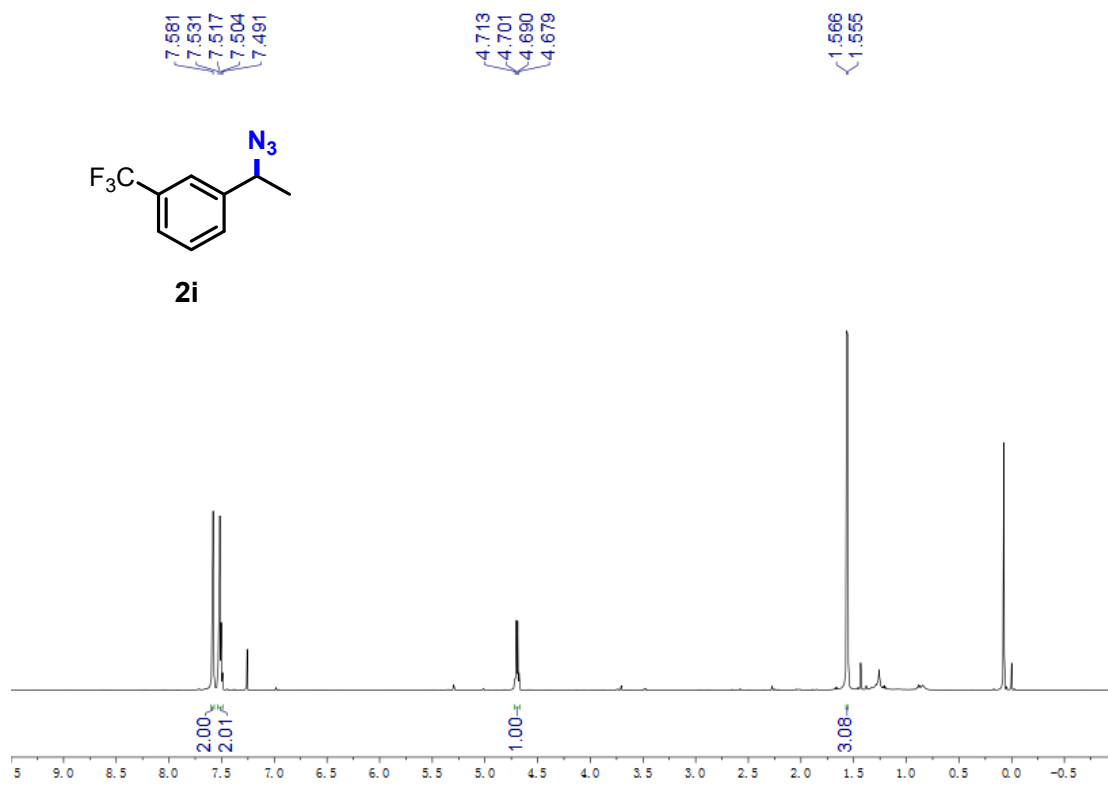

$^1\text{H}$  NMR (600 MHz,  $\text{CDCl}_3$ ) spectrum of **2i**

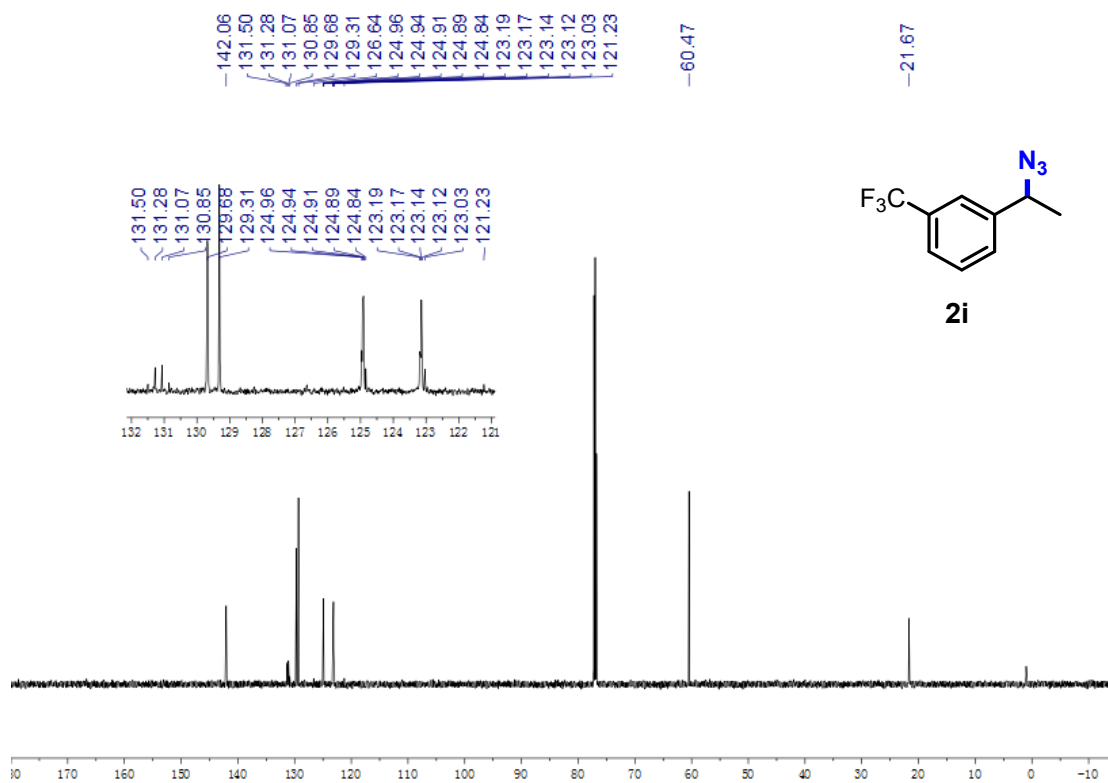

$^{13}\text{C}$  NMR (150 MHz,  $\text{CDCl}_3$ ) spectrum of **2i**

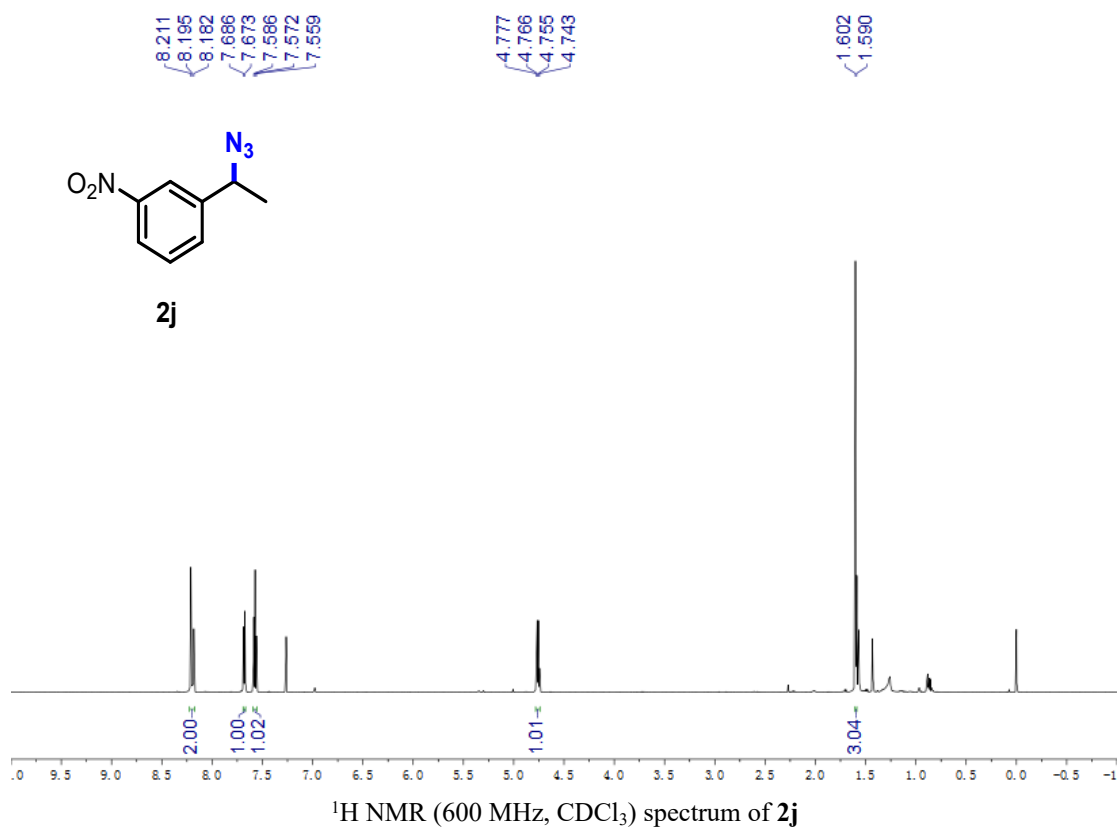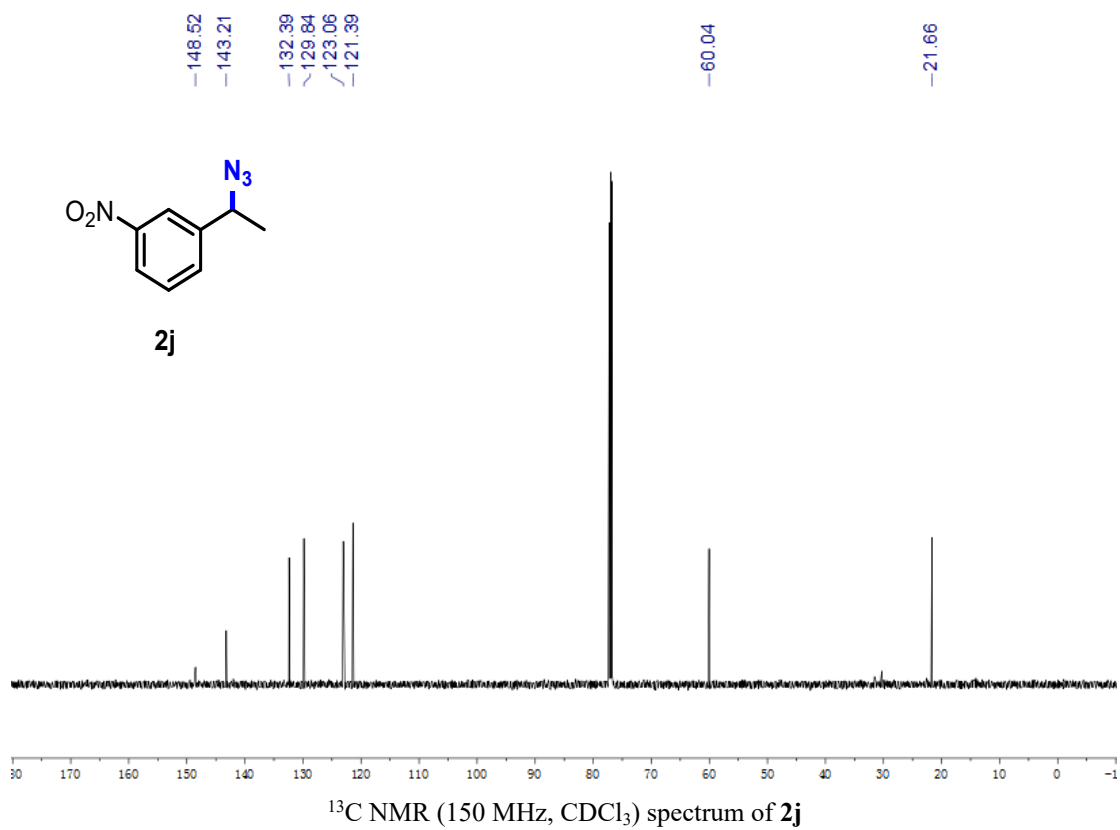

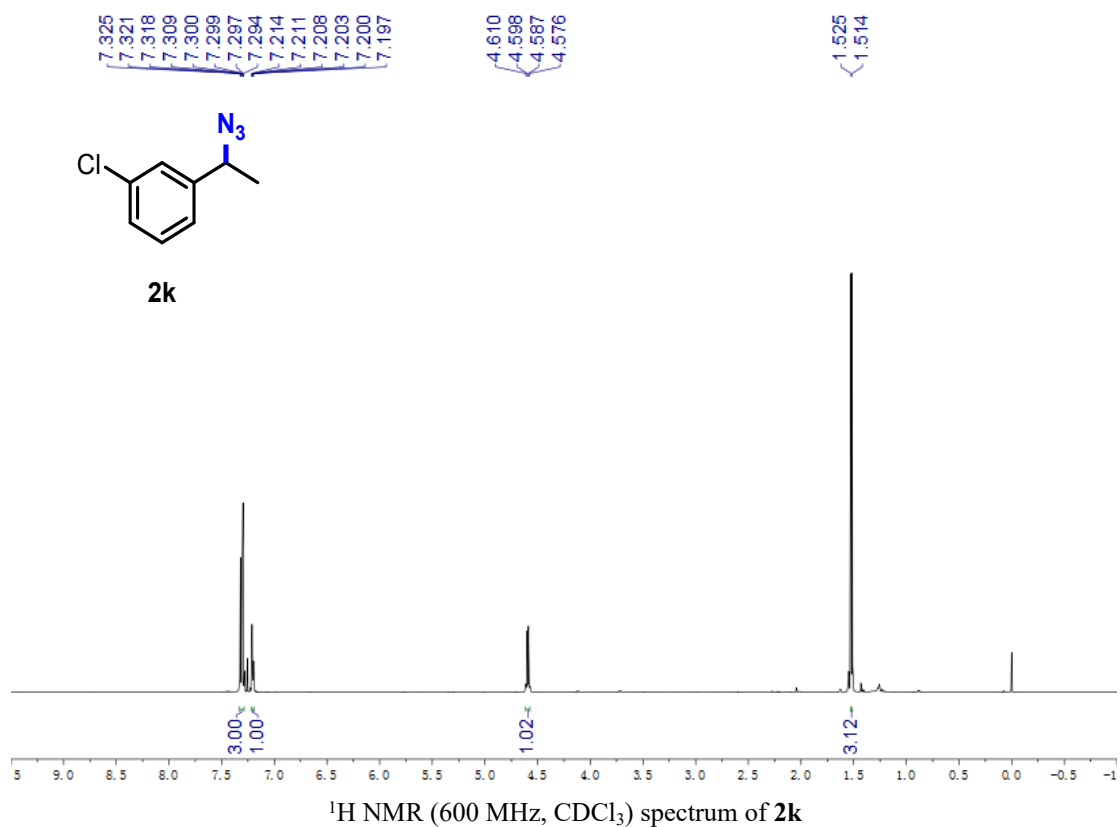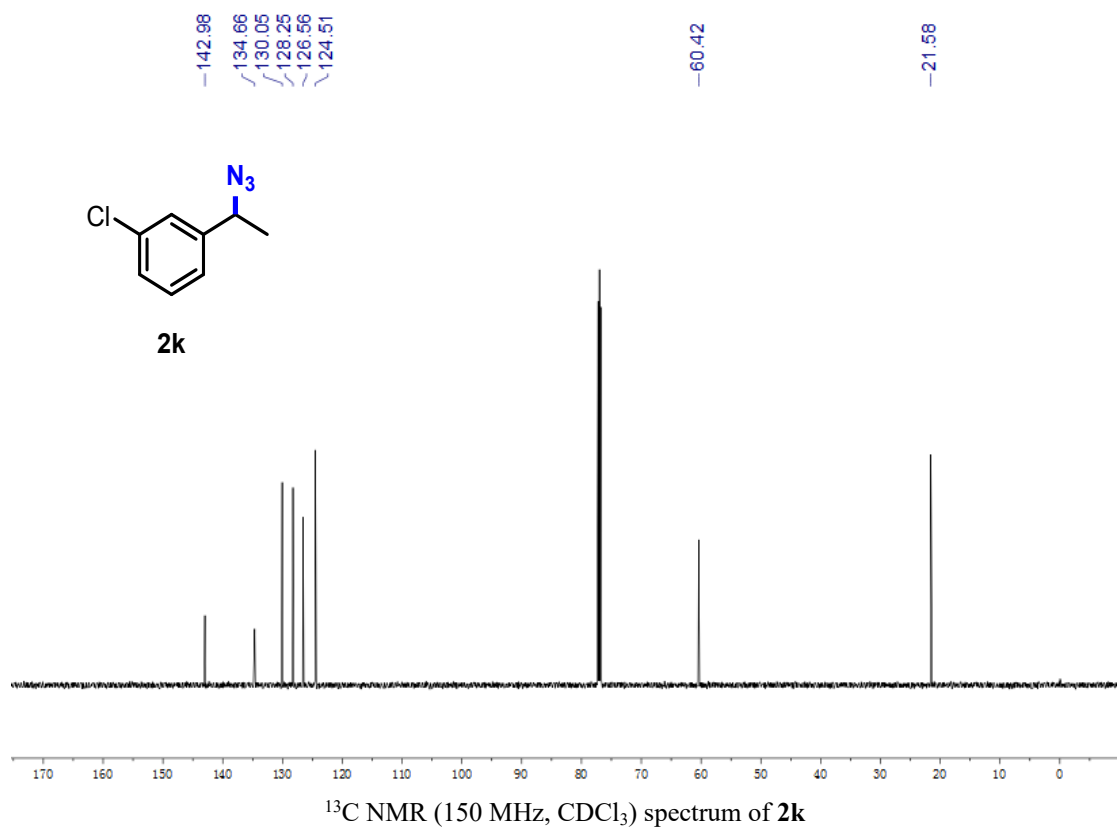

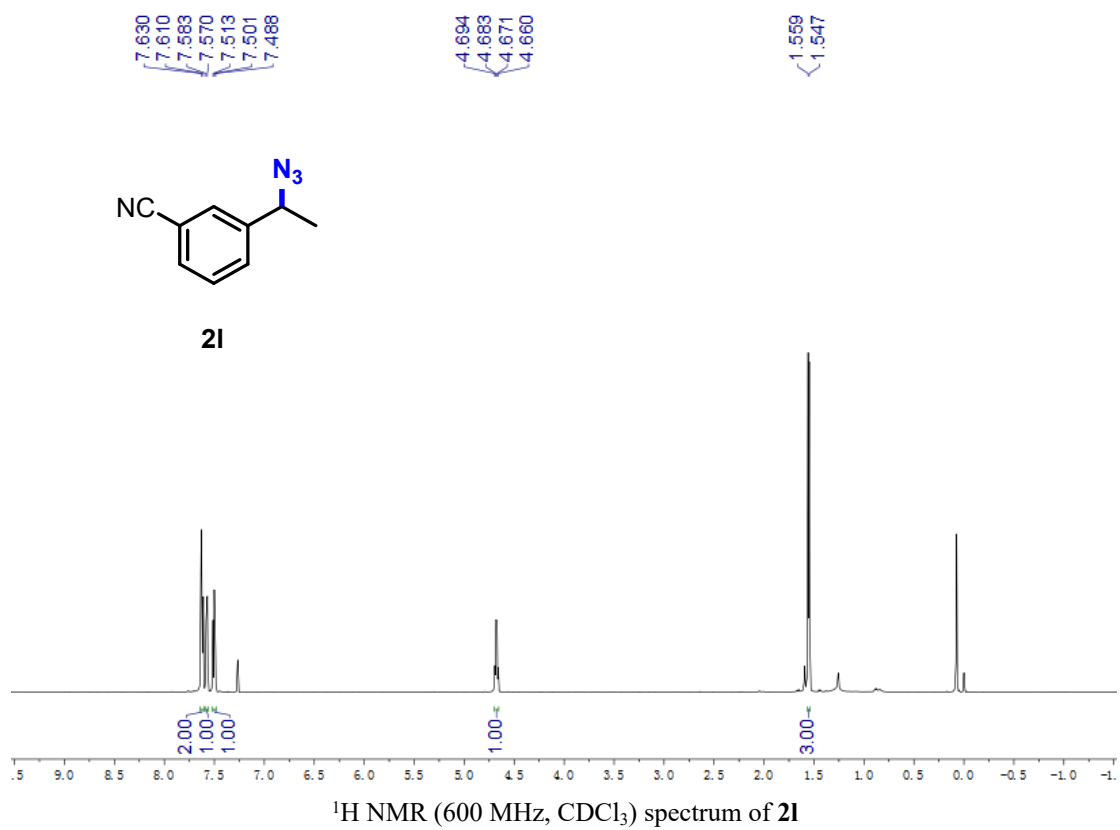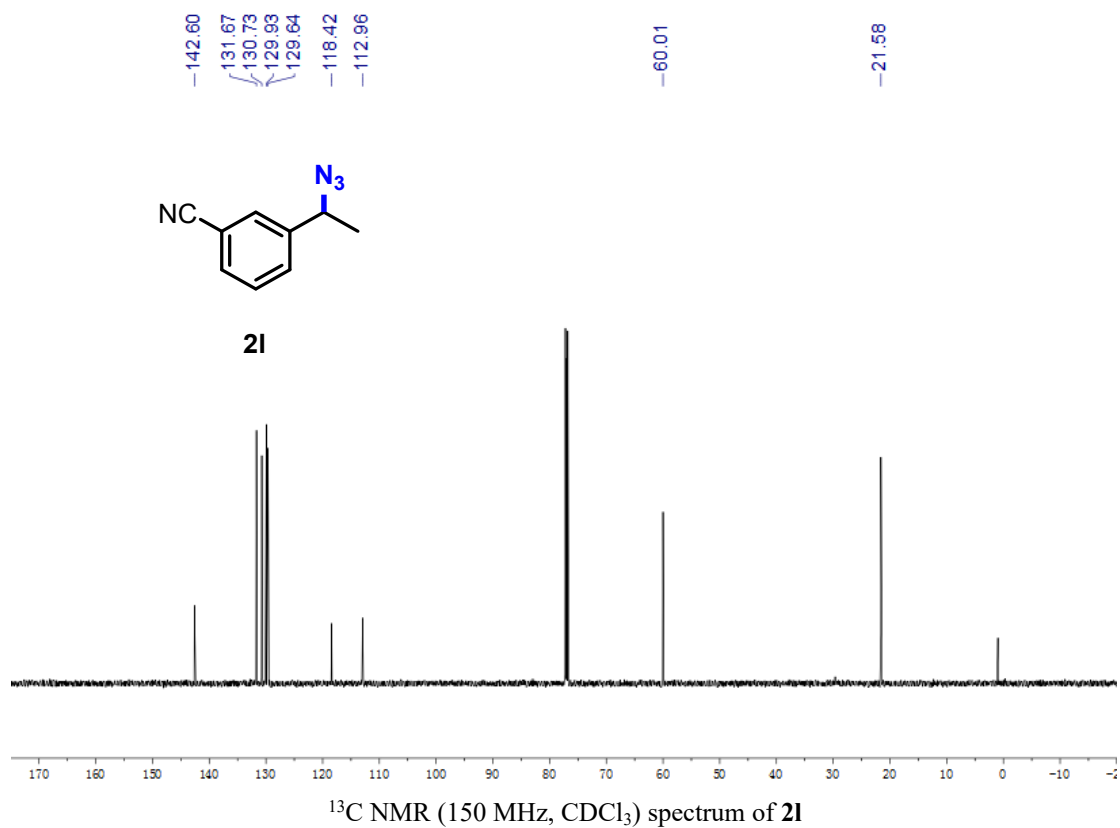

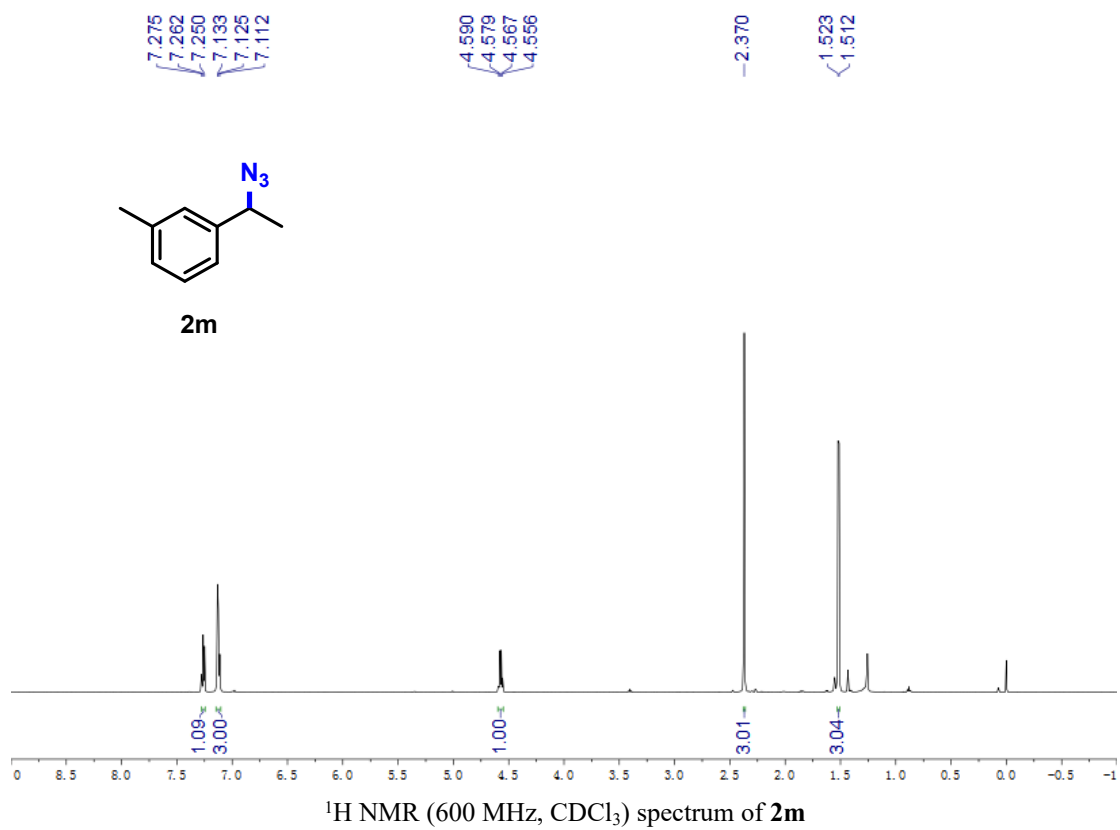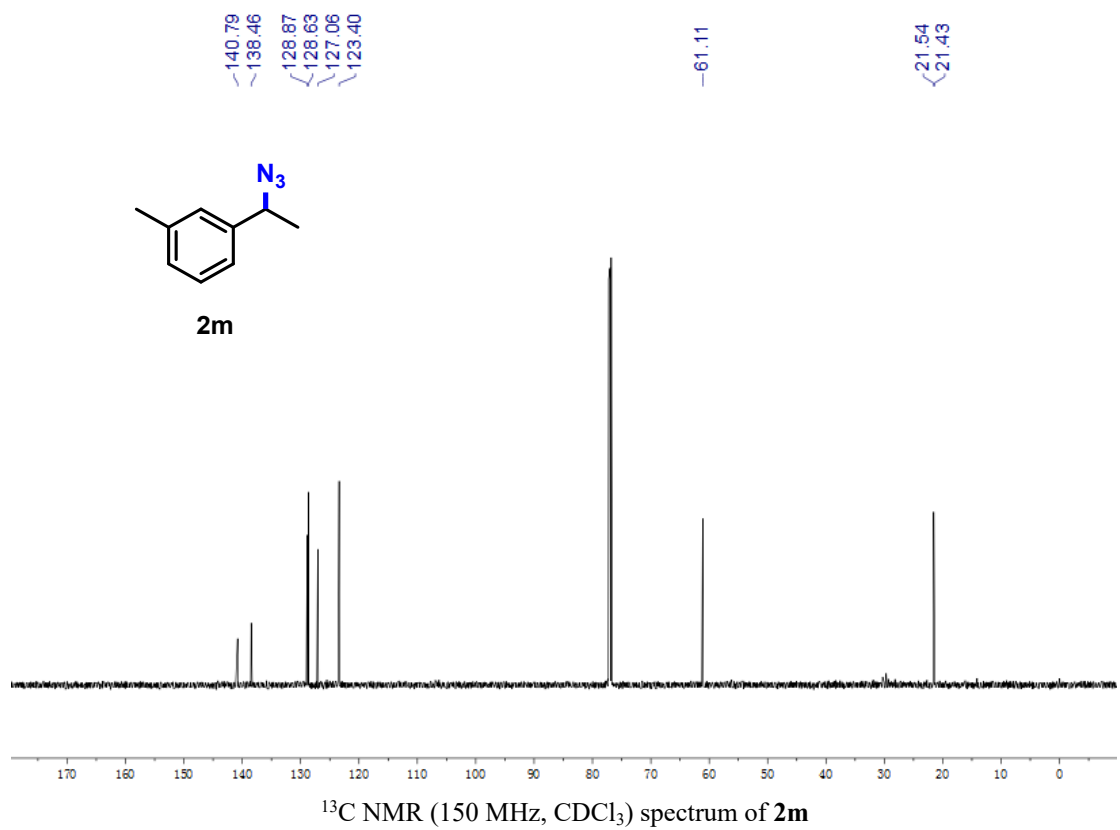



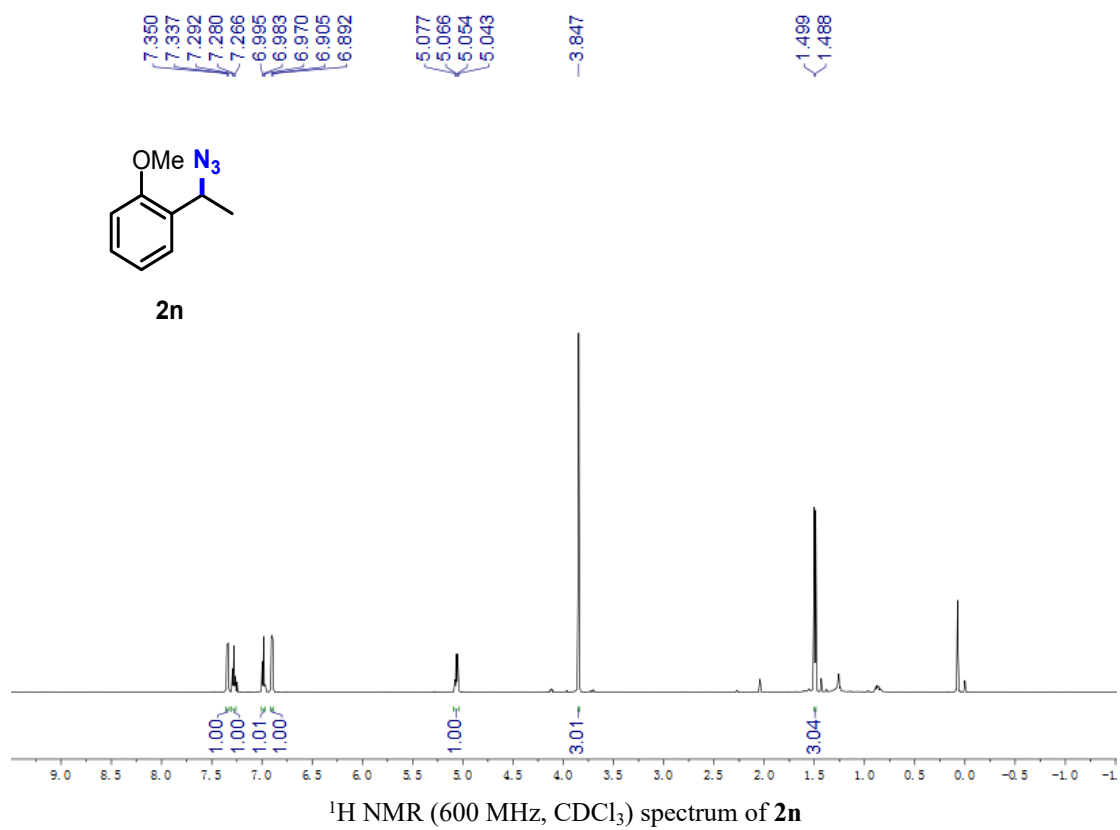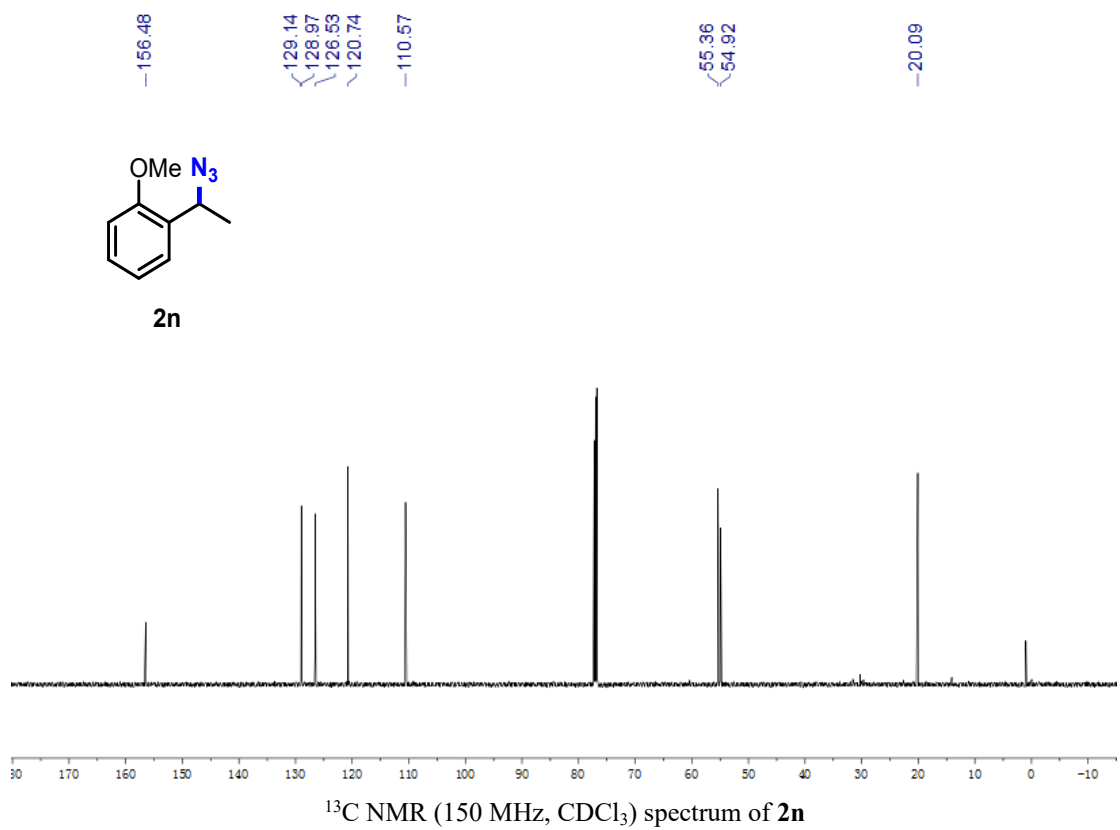

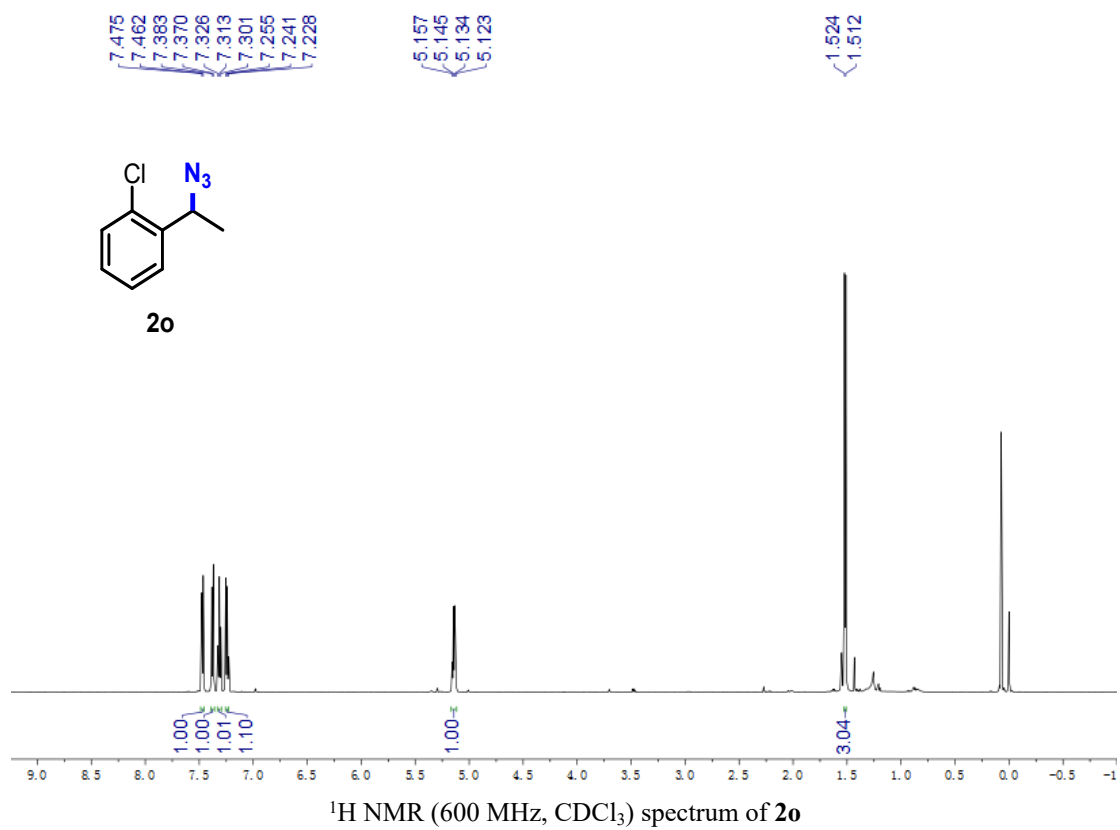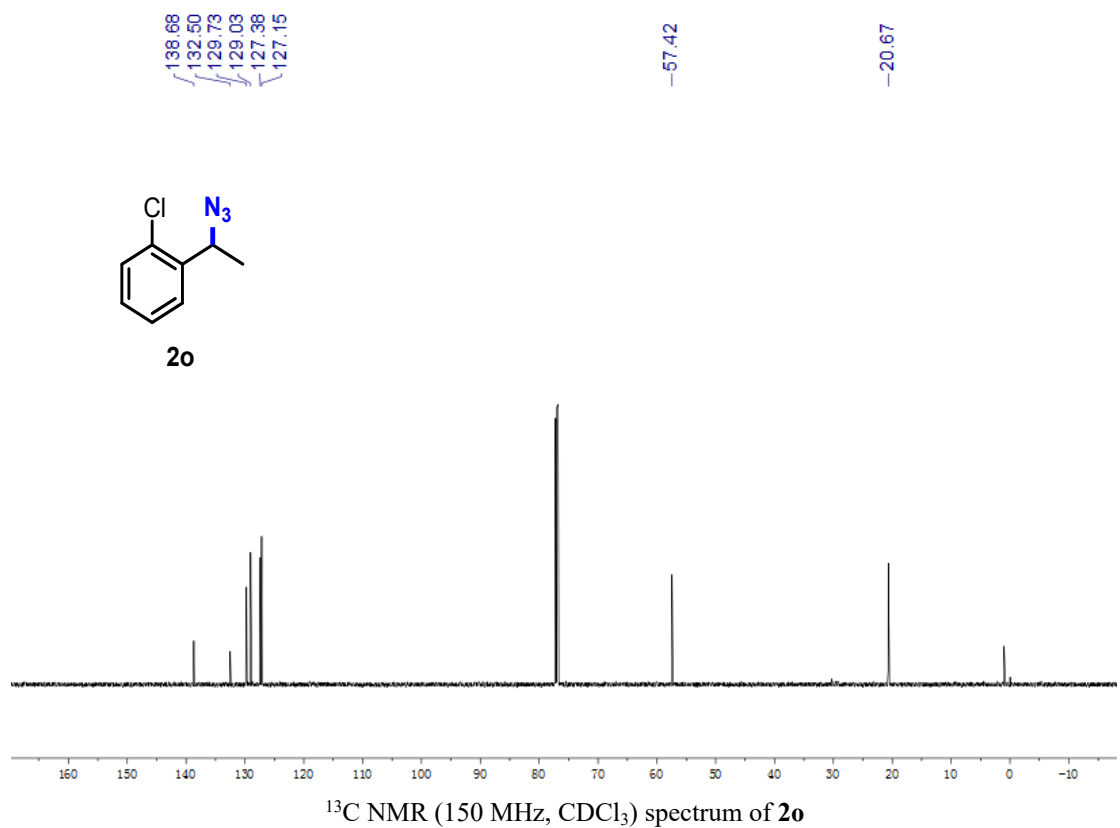

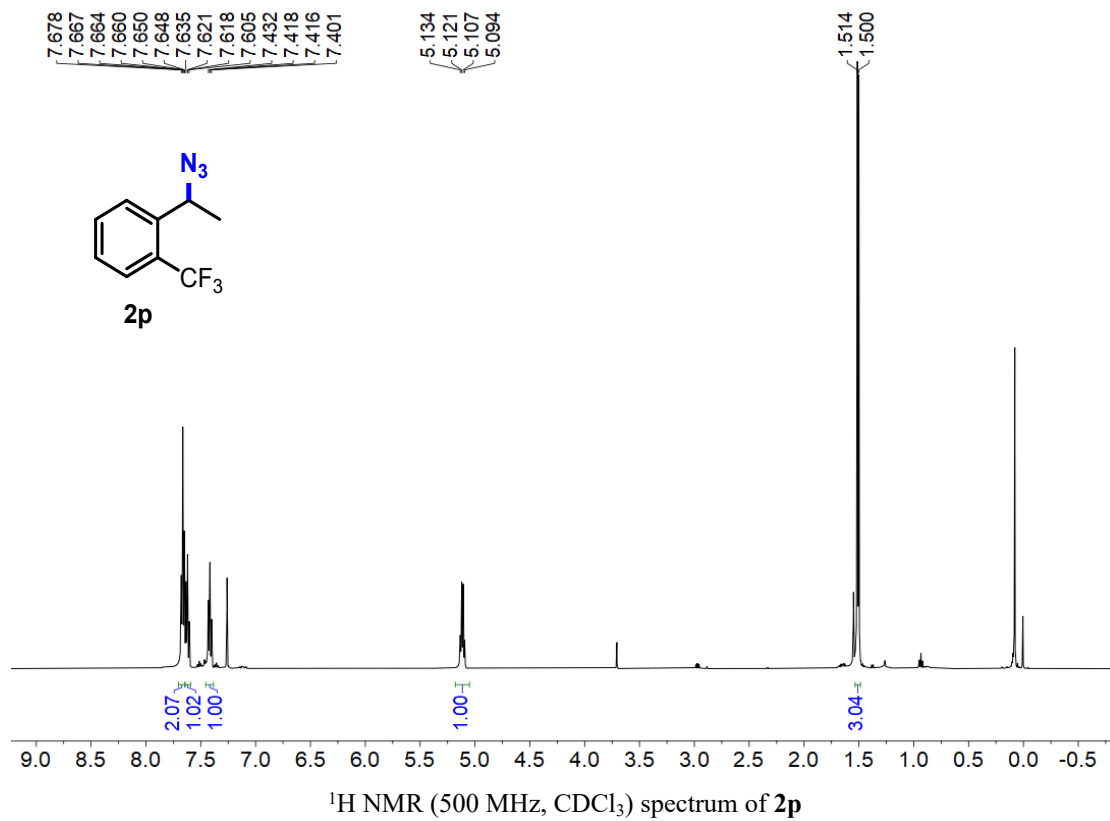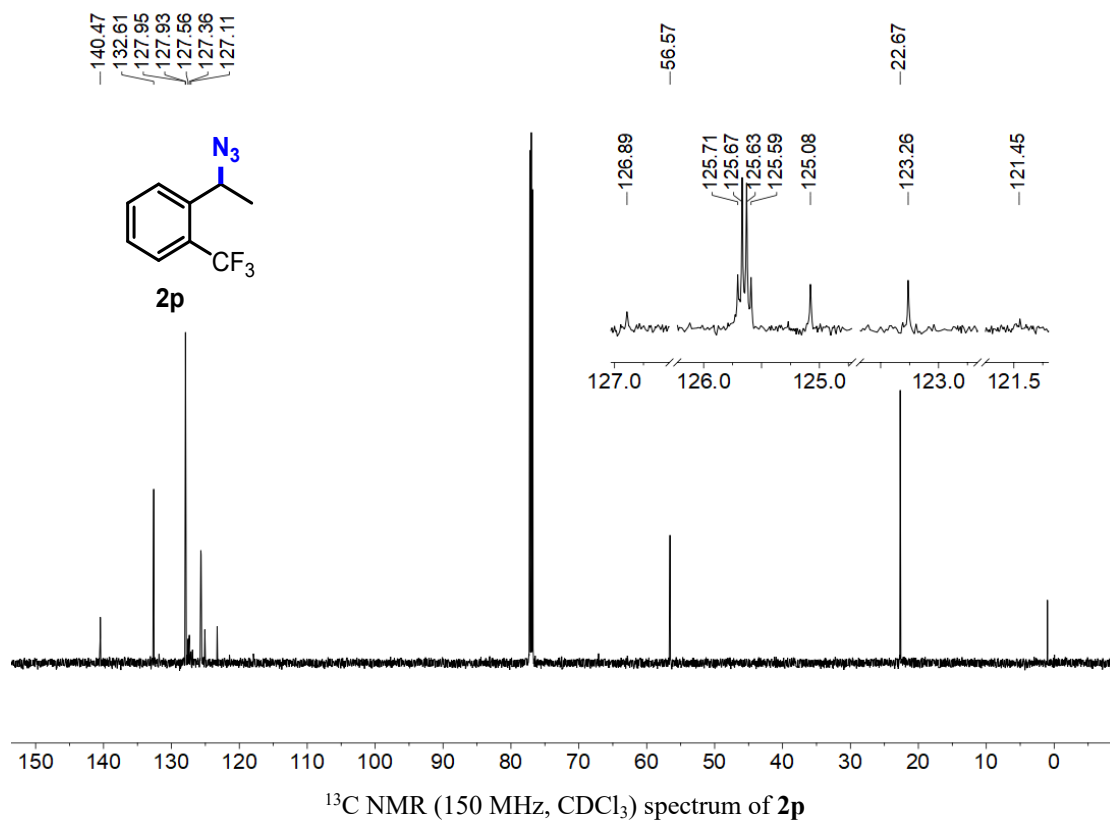

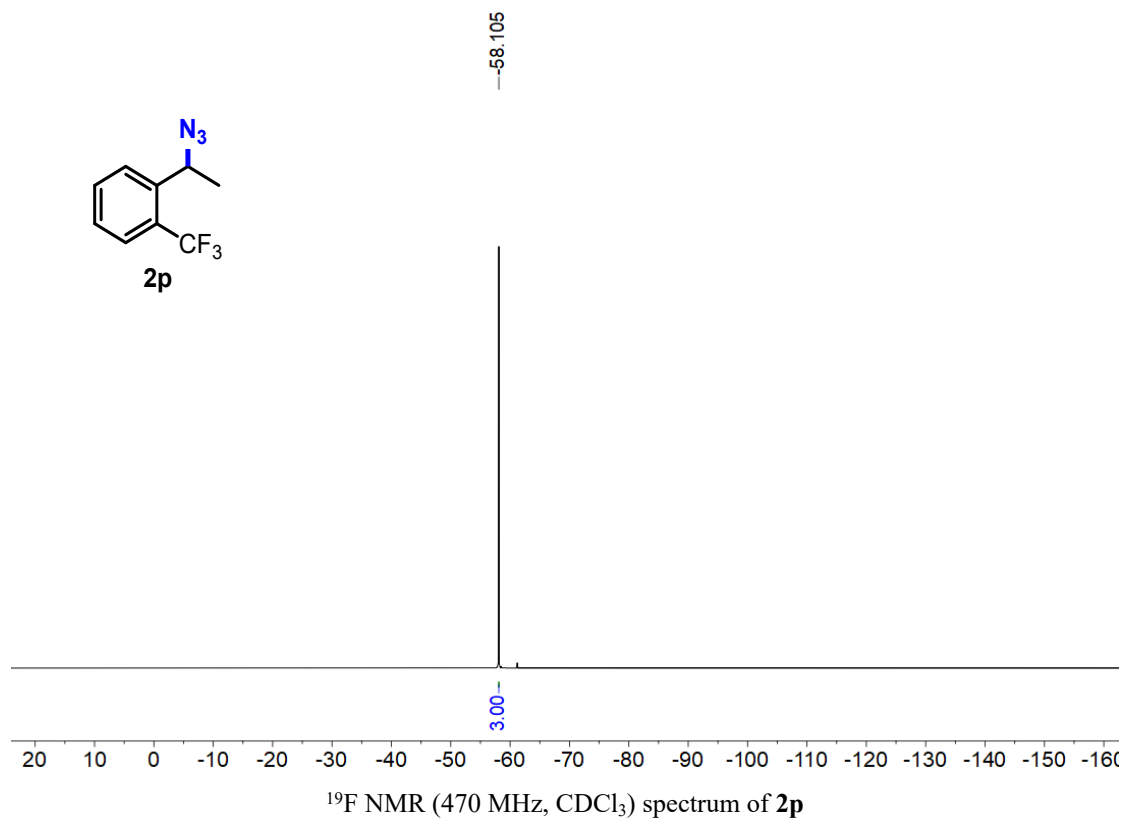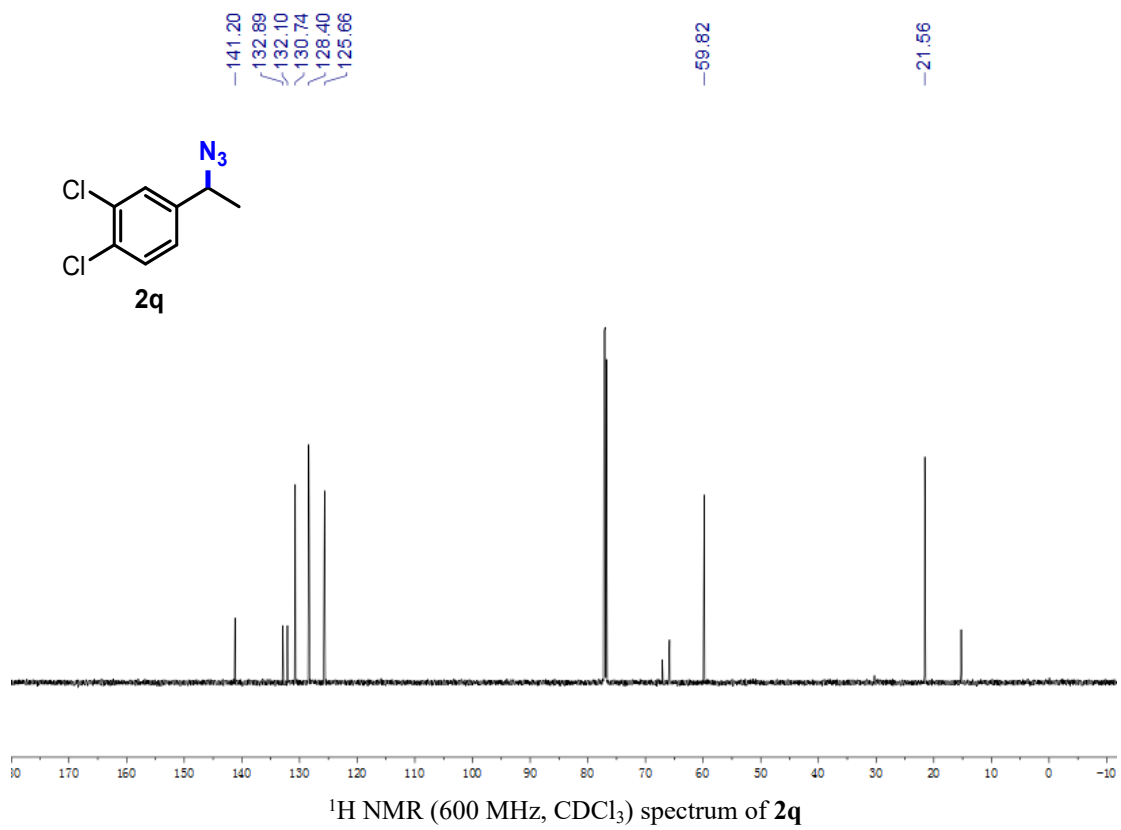

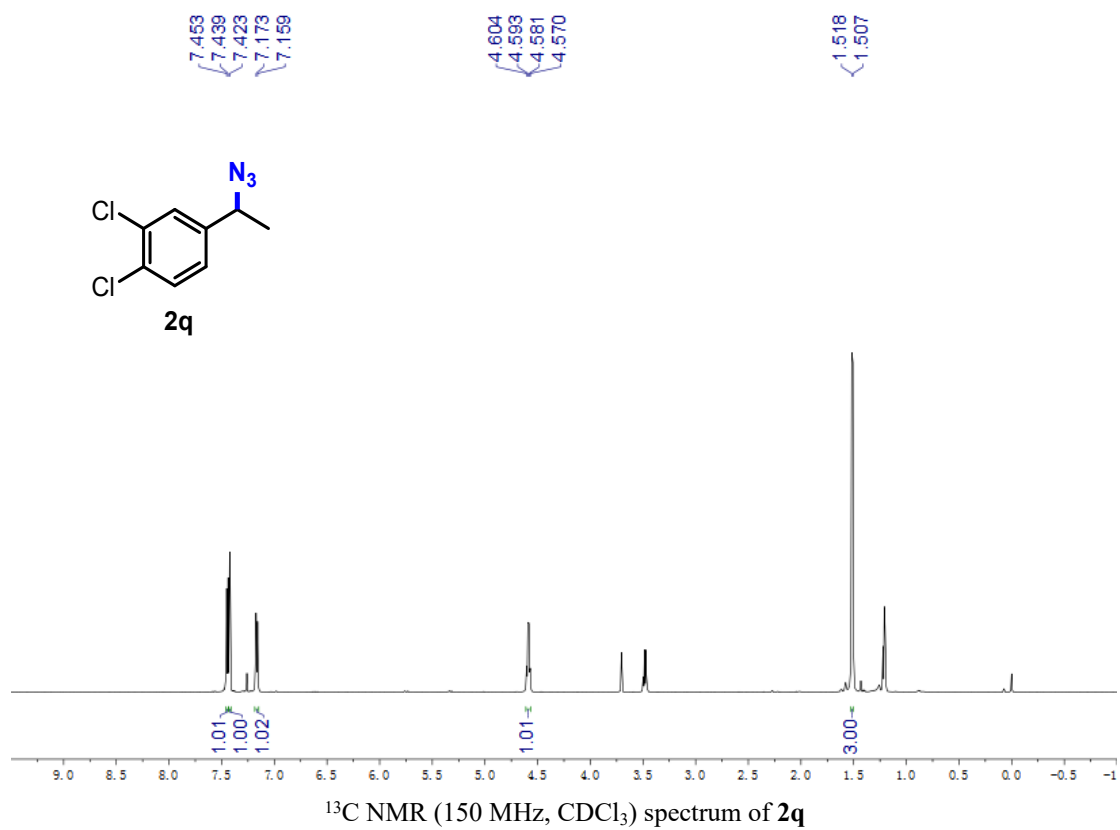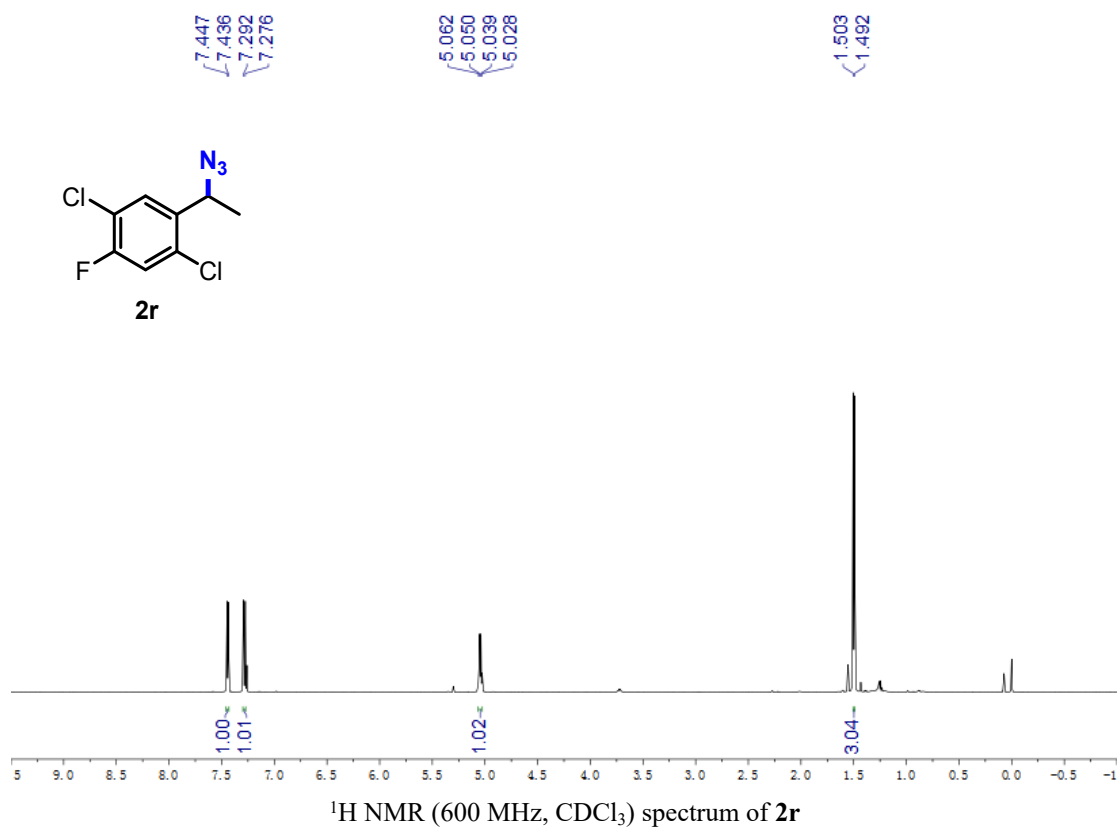

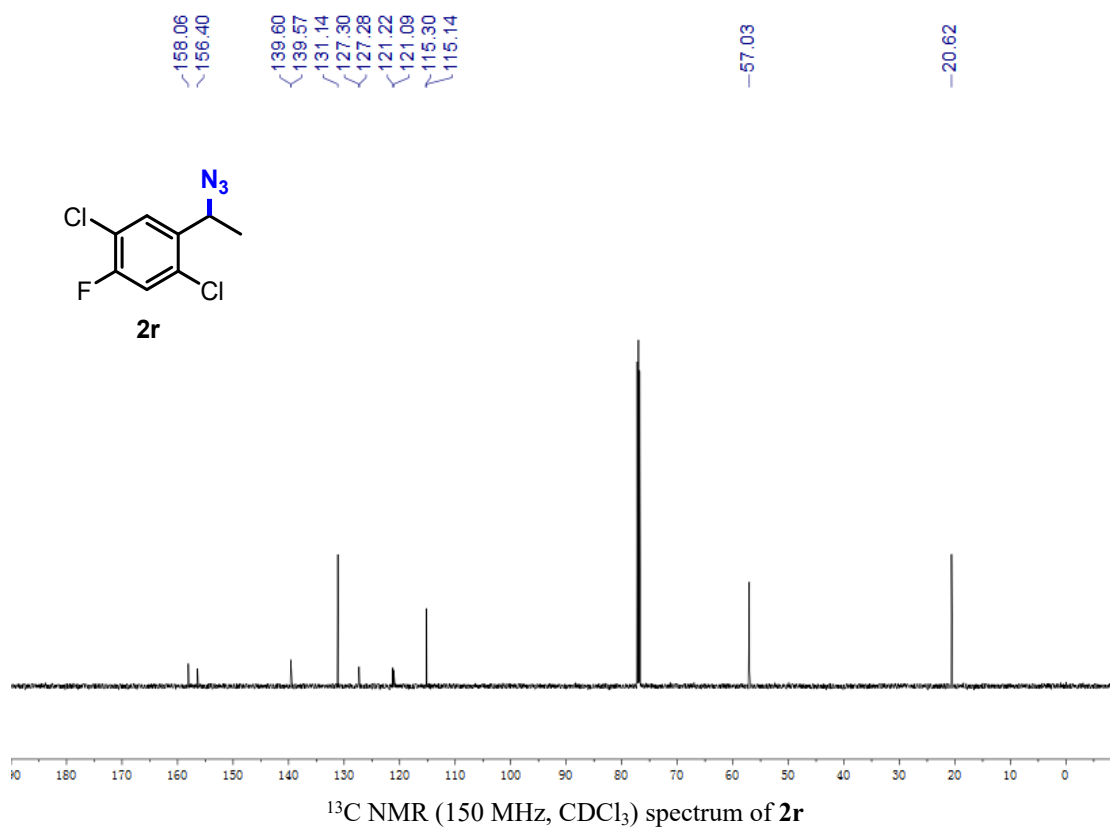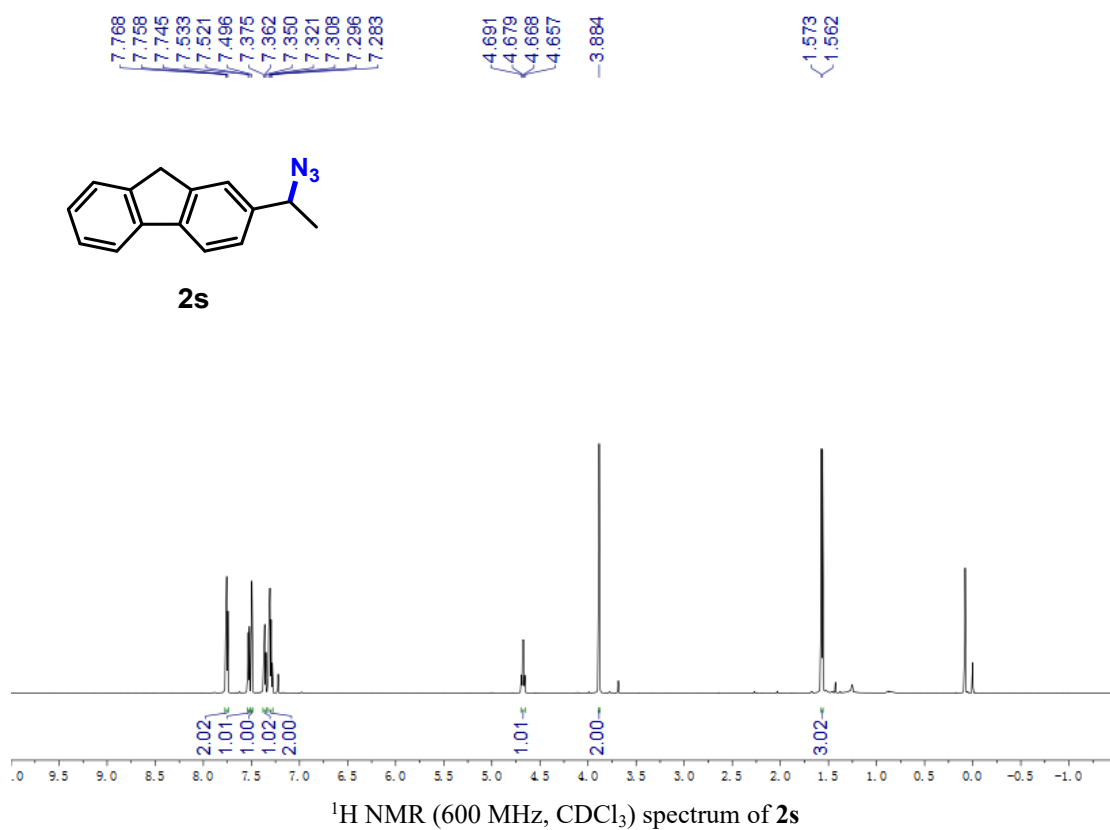

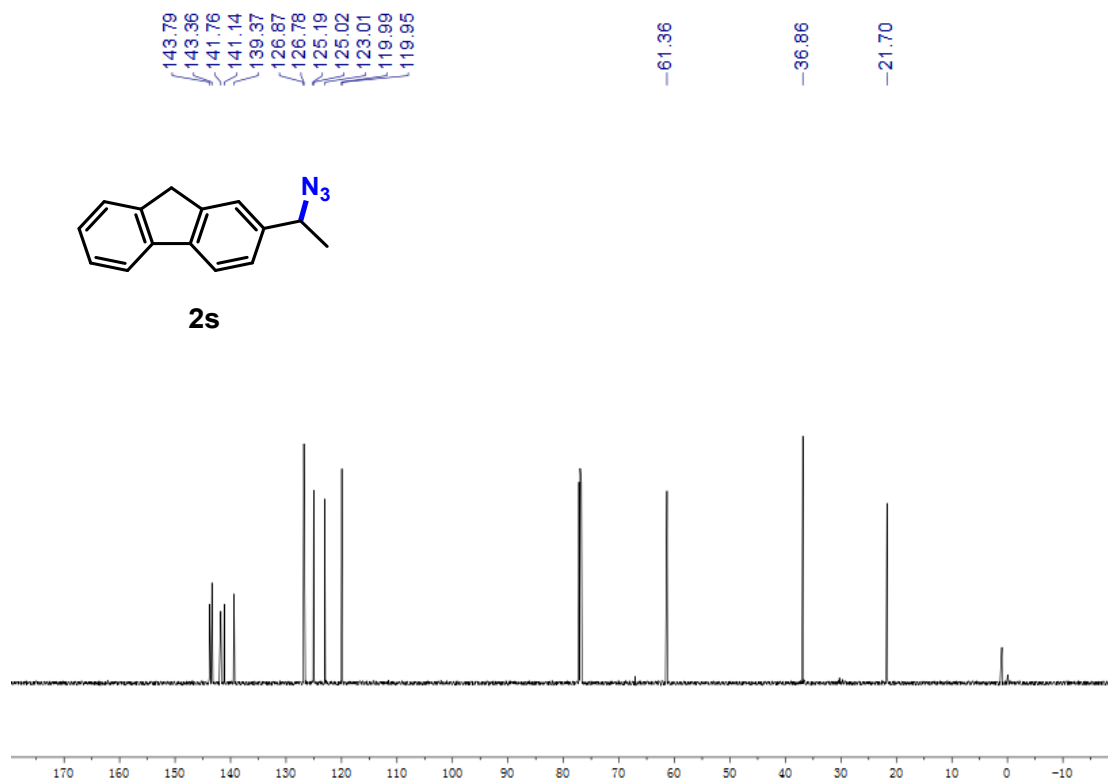

<sup>13</sup>C NMR (150 MHz, CDCl<sub>3</sub>) spectrum of **2s**

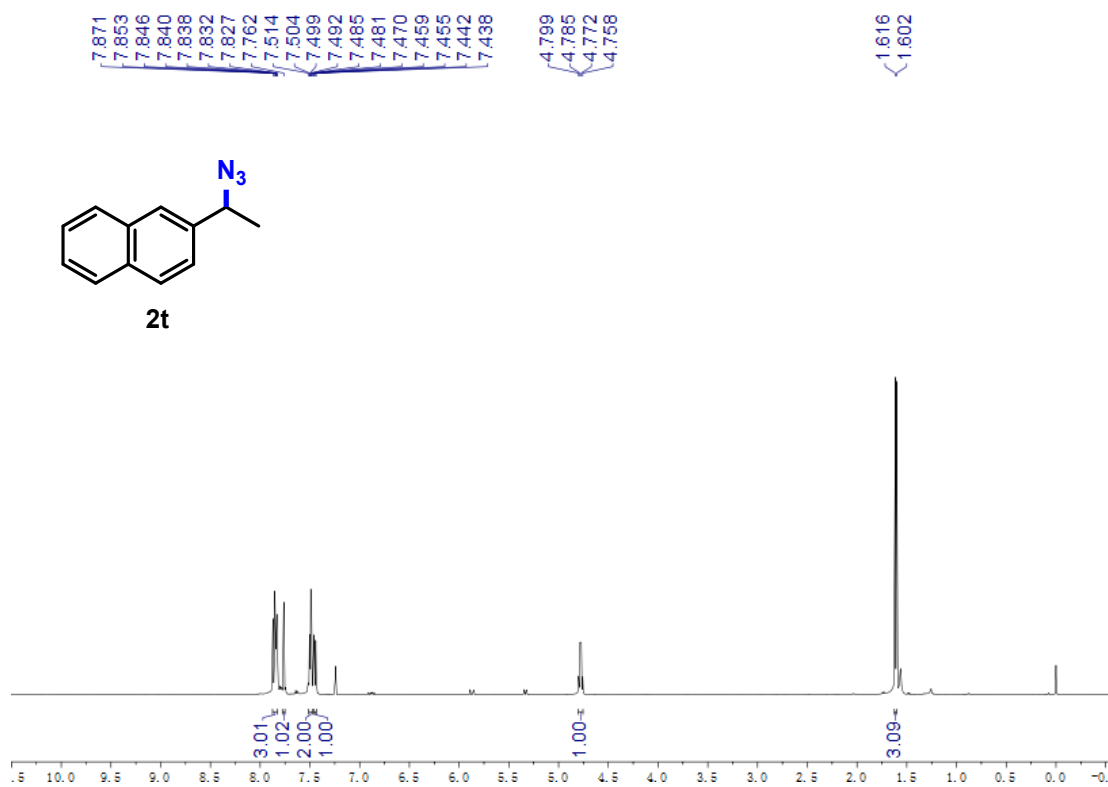

<sup>1</sup>H NMR (600 MHz, CDCl<sub>3</sub>) spectrum of **2t**

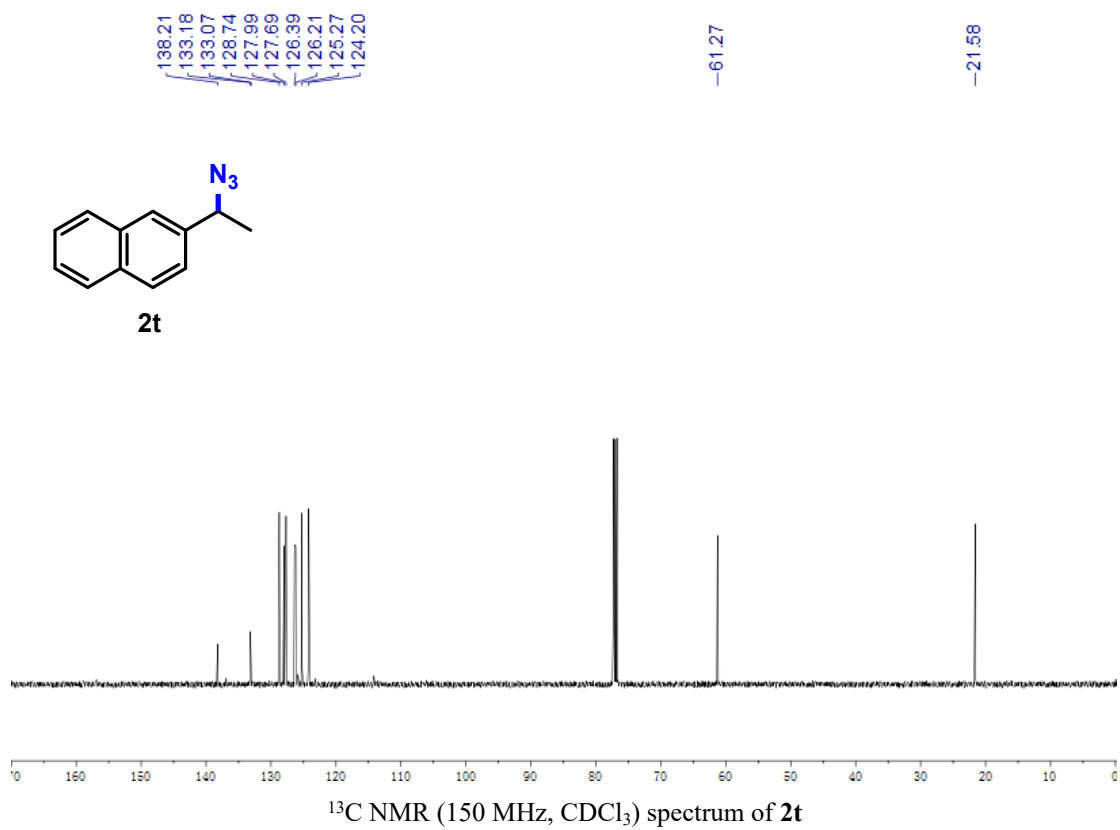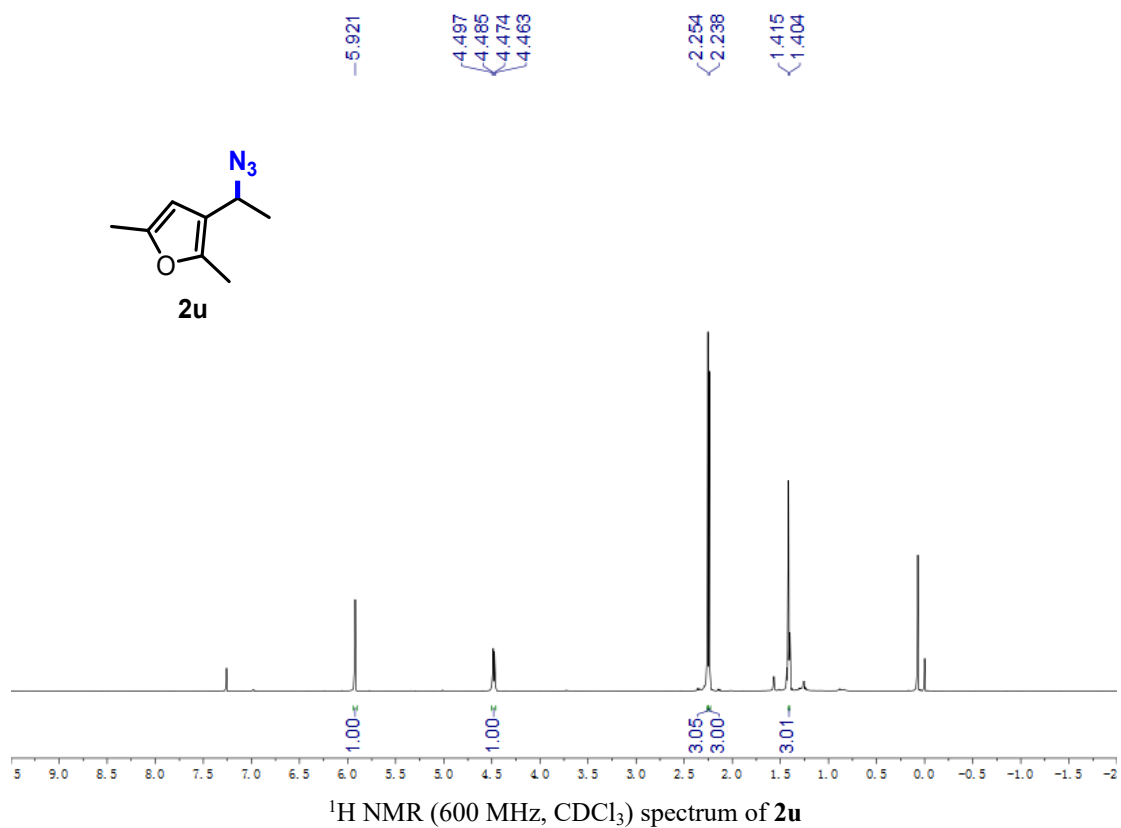



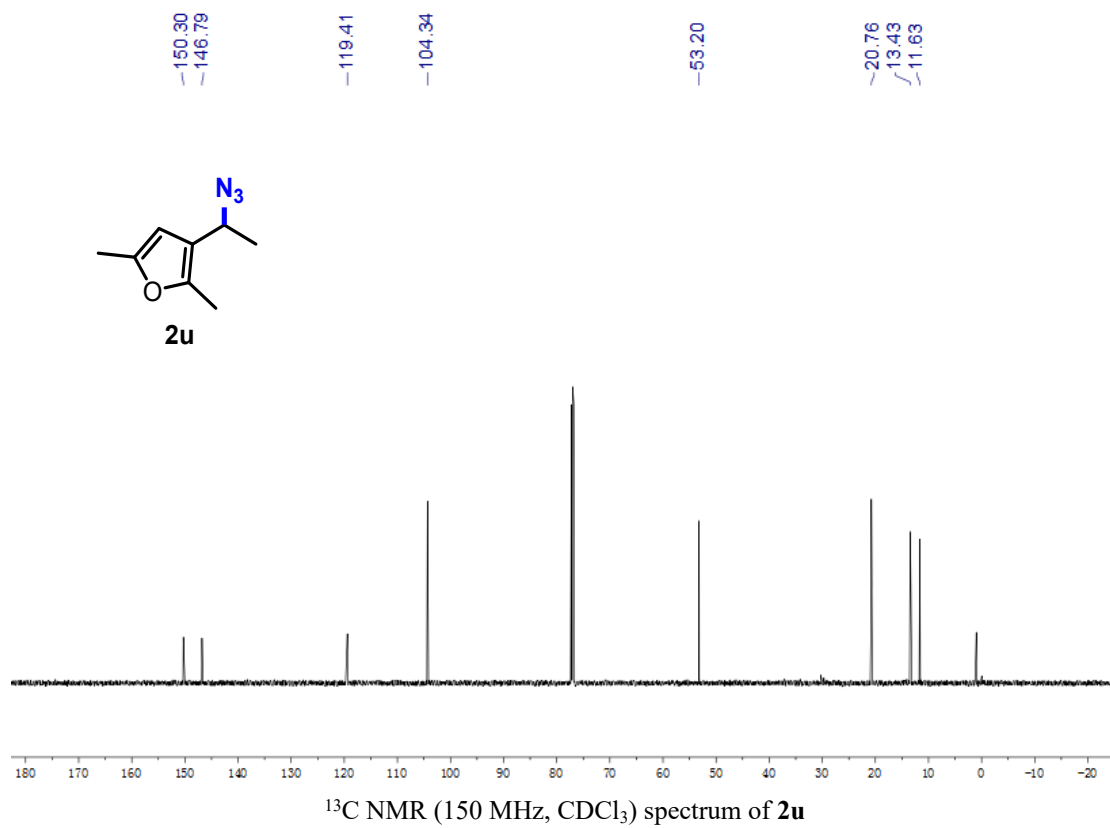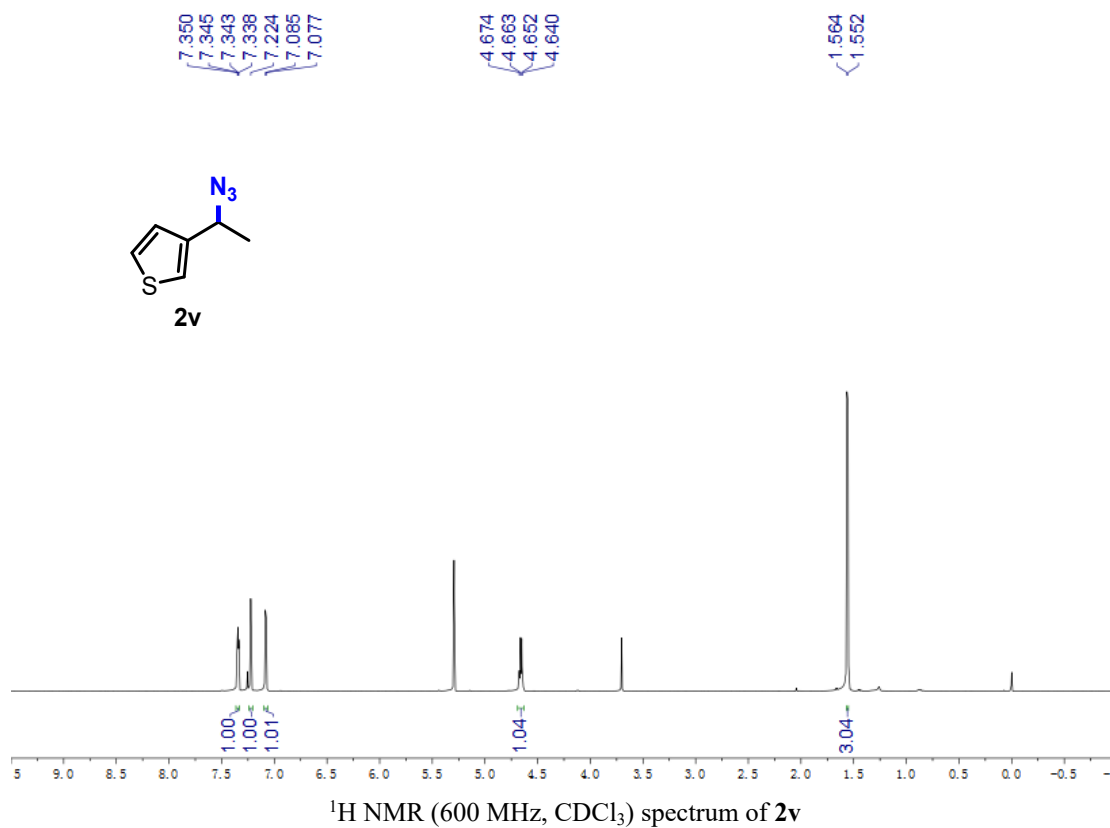

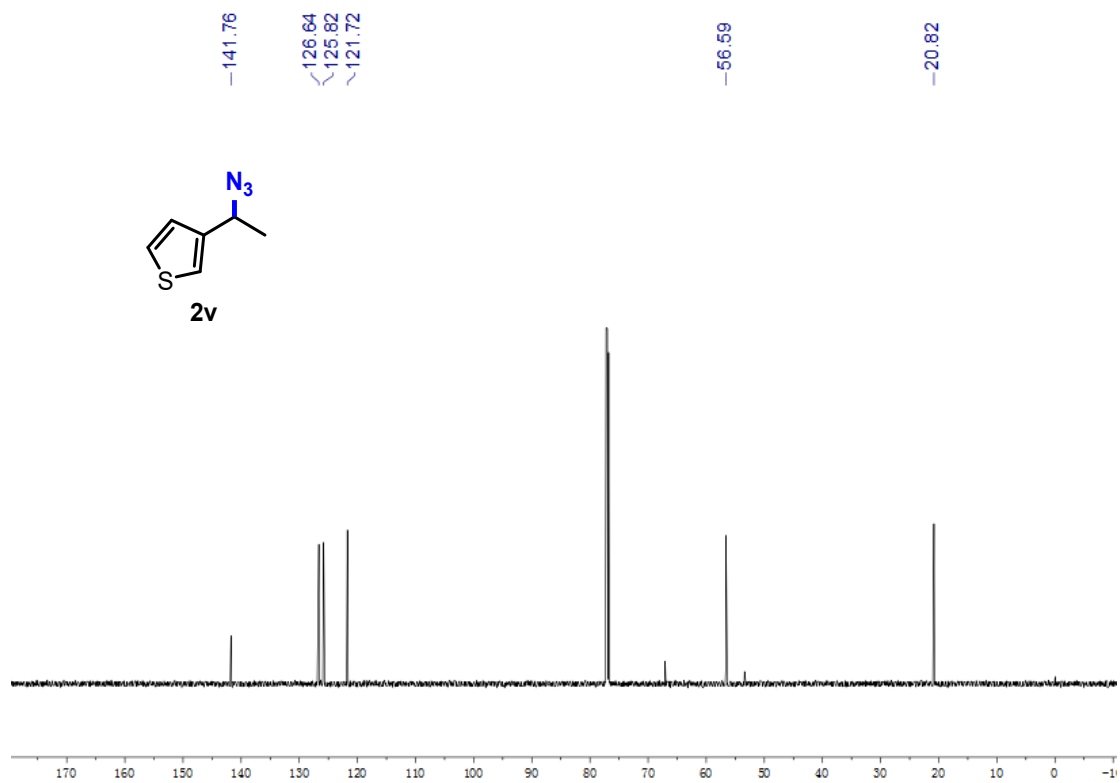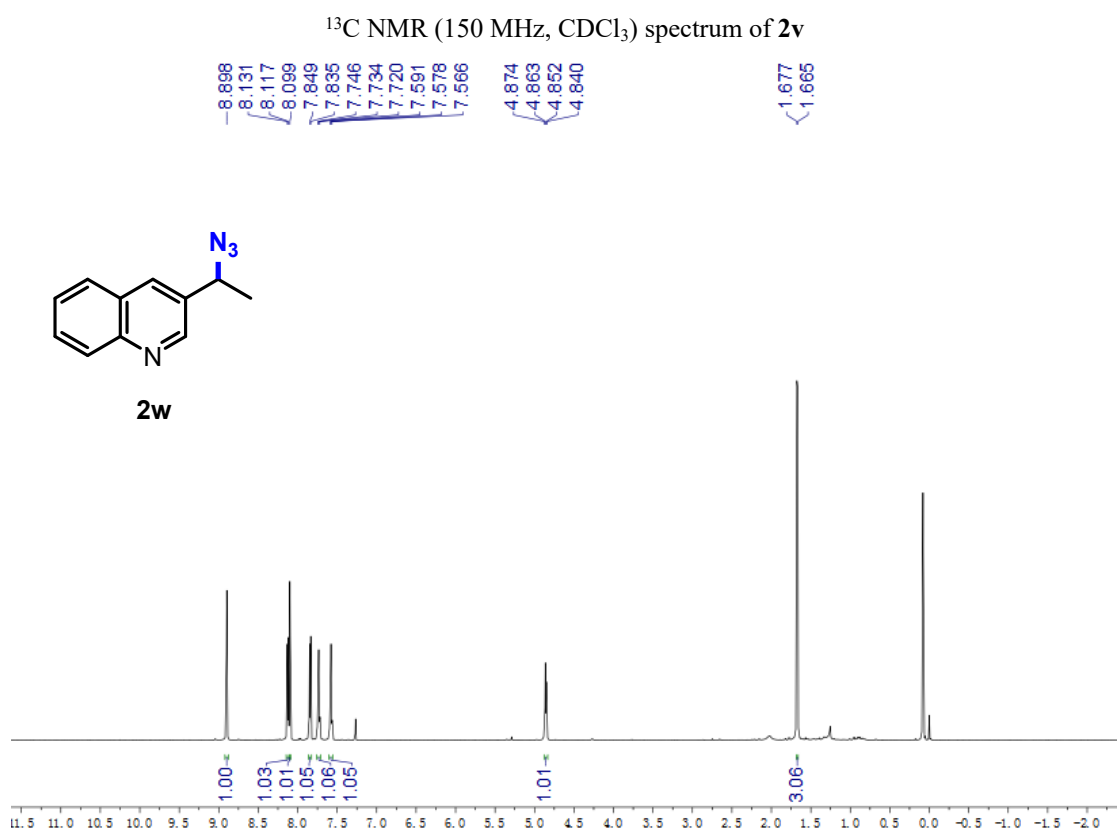

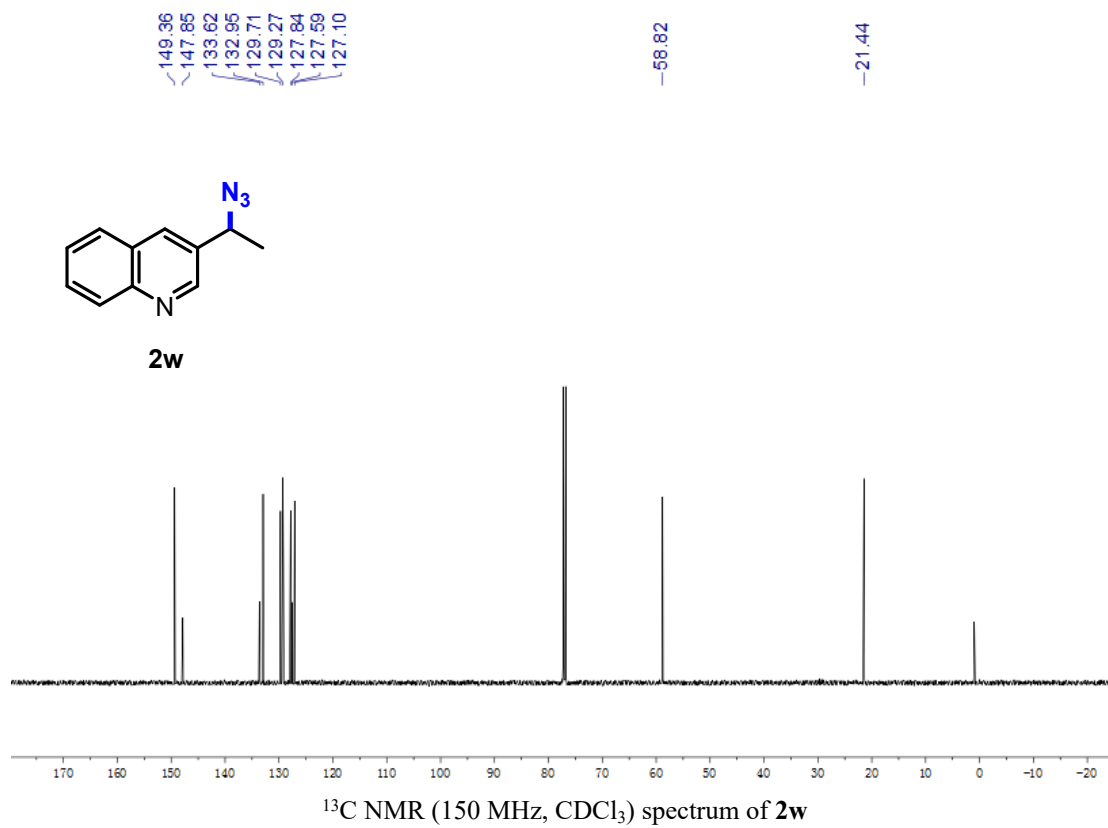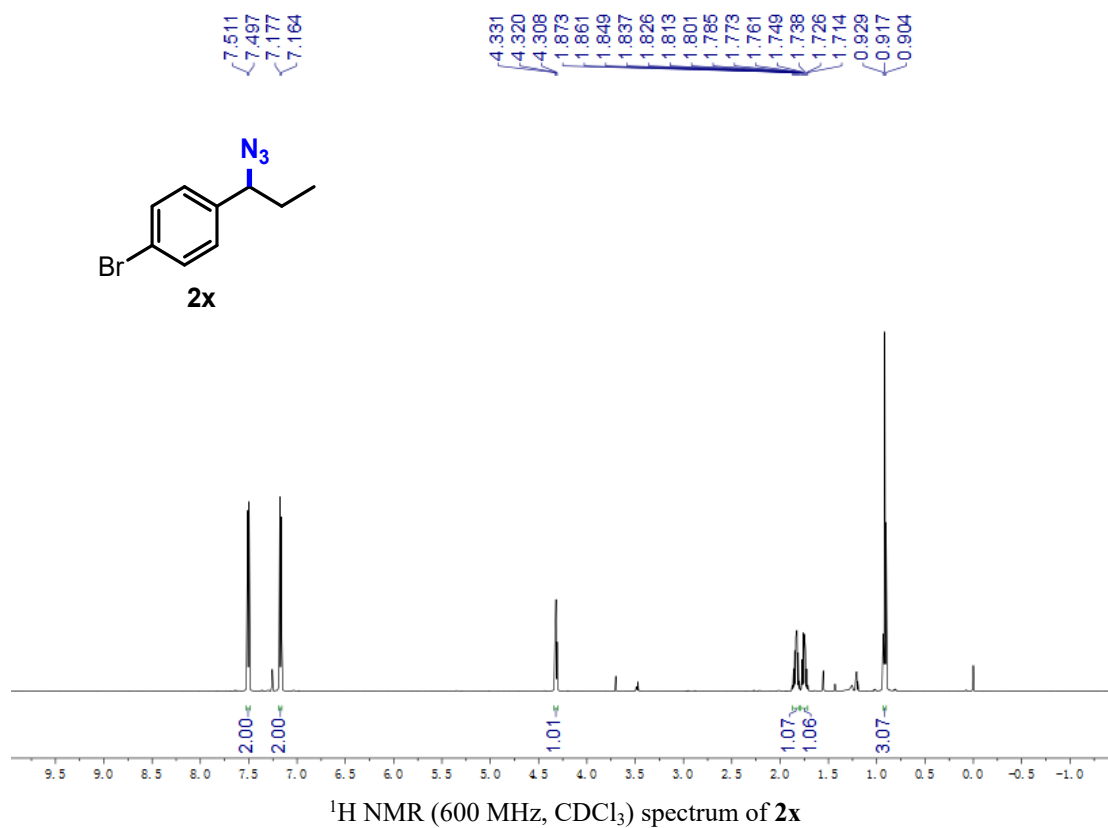

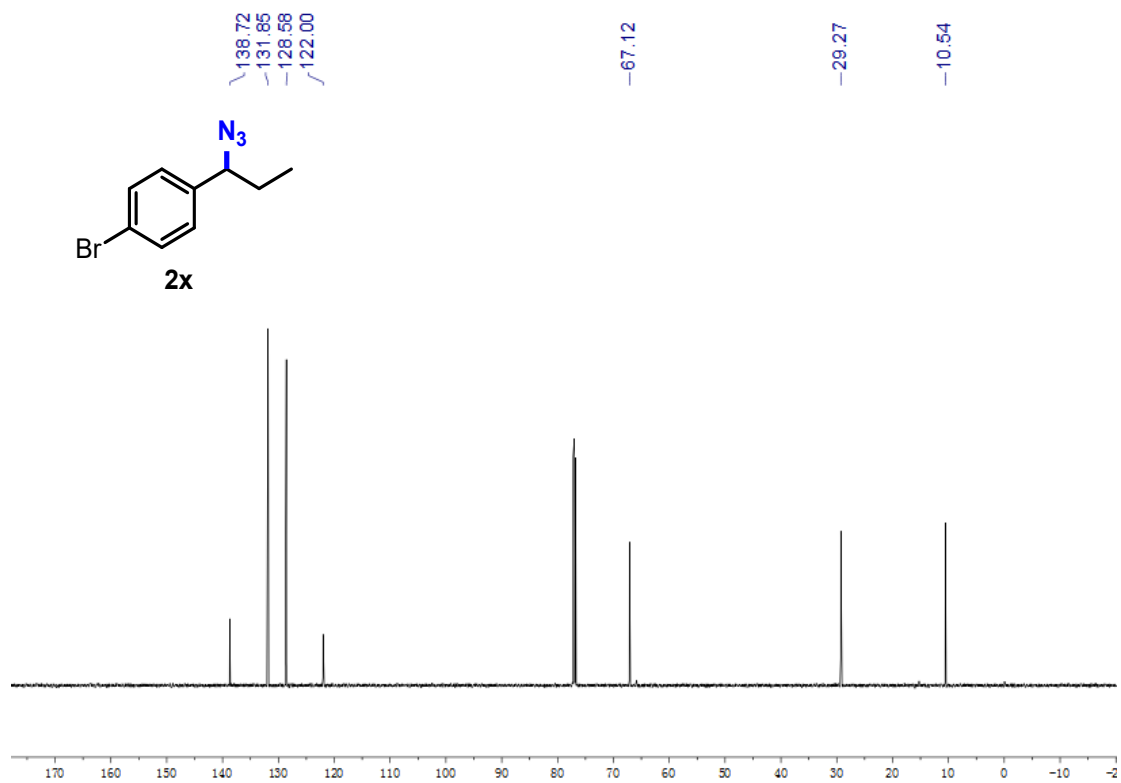

$^{13}\text{C}$  NMR (150 MHz,  $\text{CDCl}_3$ ) spectrum of **2x**

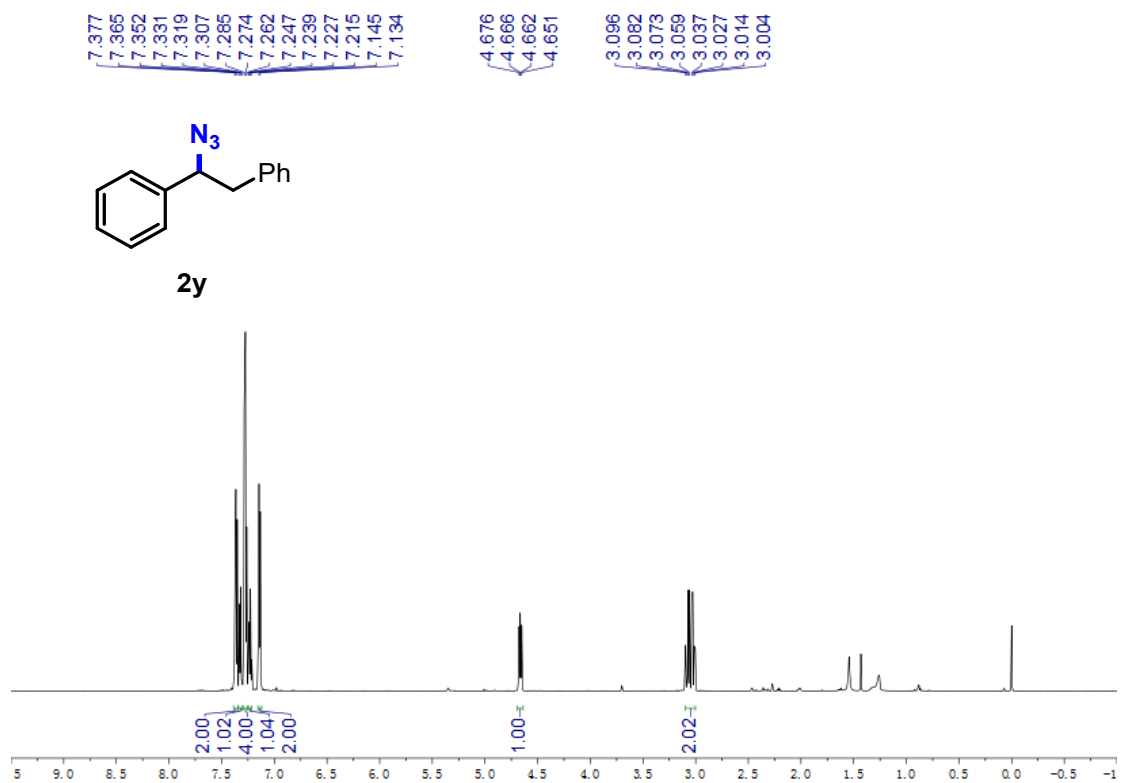

$^1\text{H}$  NMR (600 MHz,  $\text{CDCl}_3$ ) spectrum of **2y**

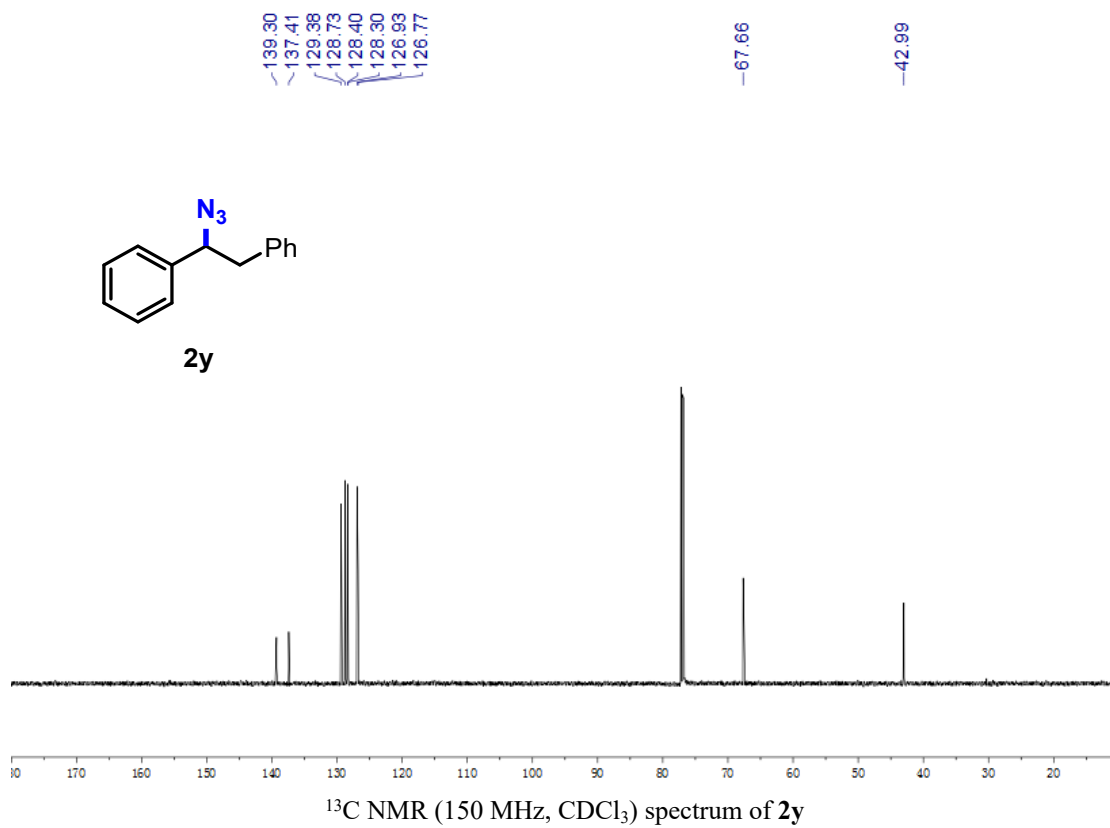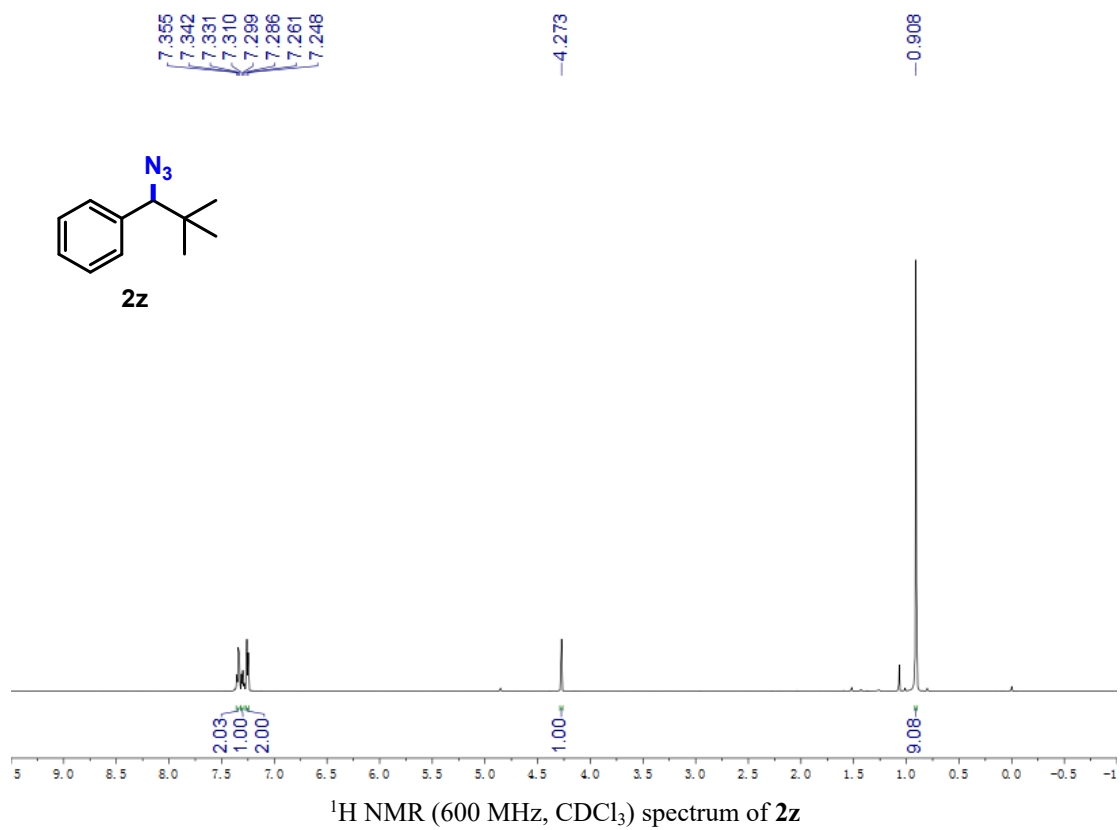

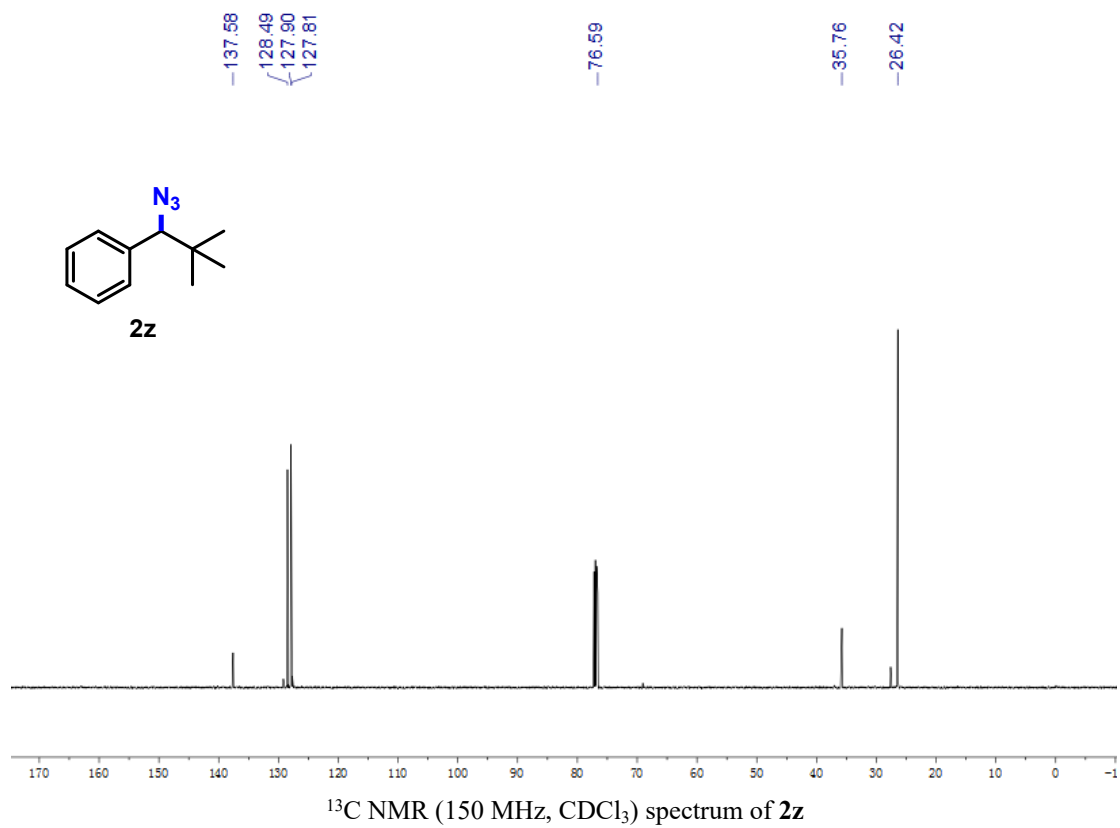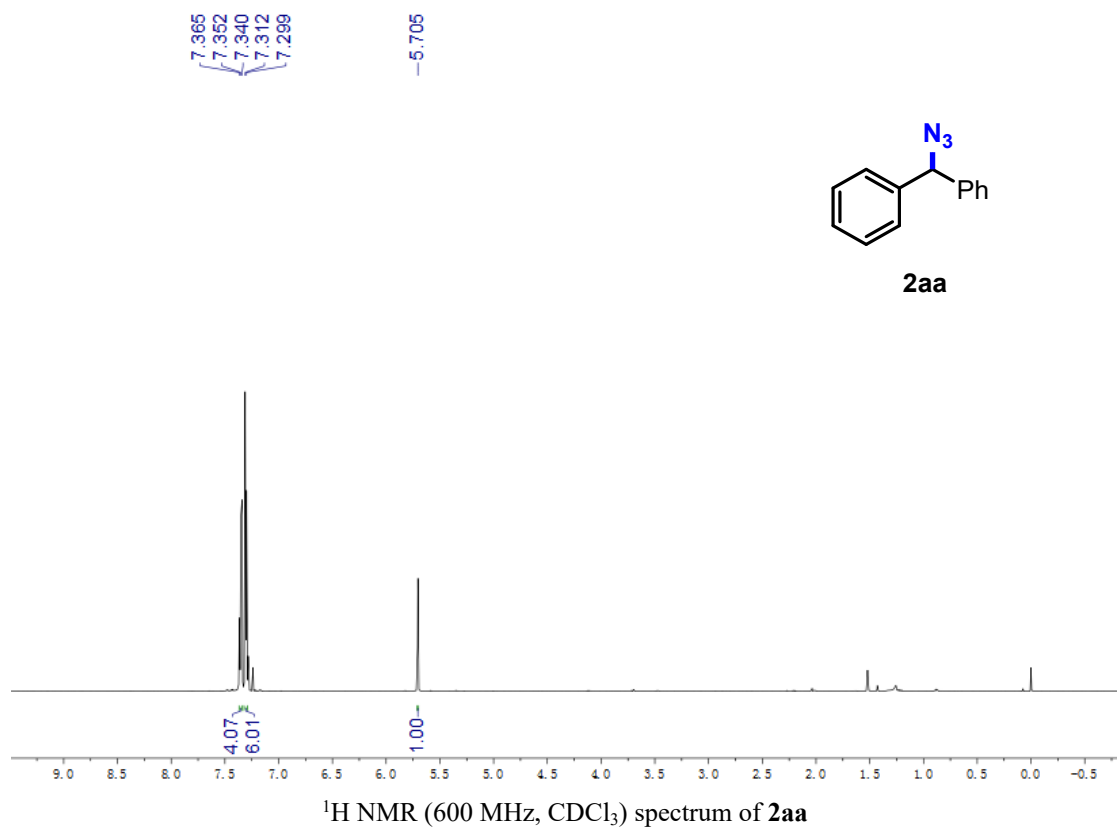

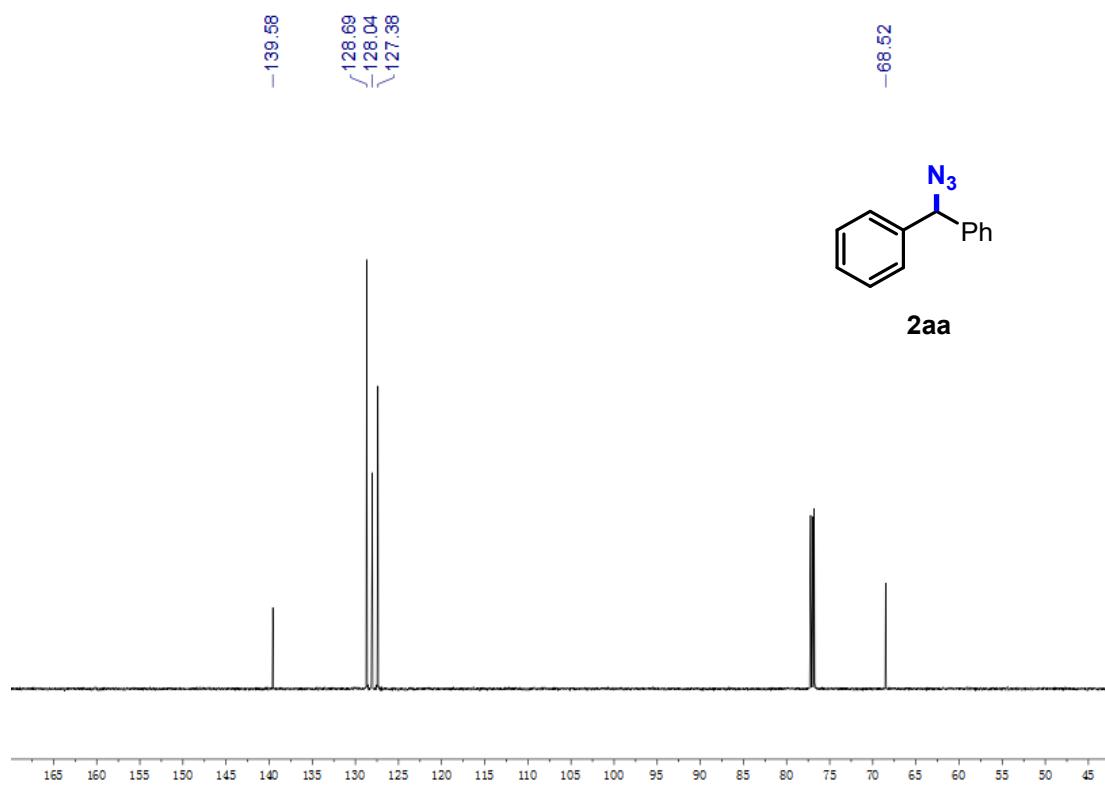

$^{13}\text{C}$  NMR (150 MHz,  $\text{CDCl}_3$ ) spectrum of **2aa**

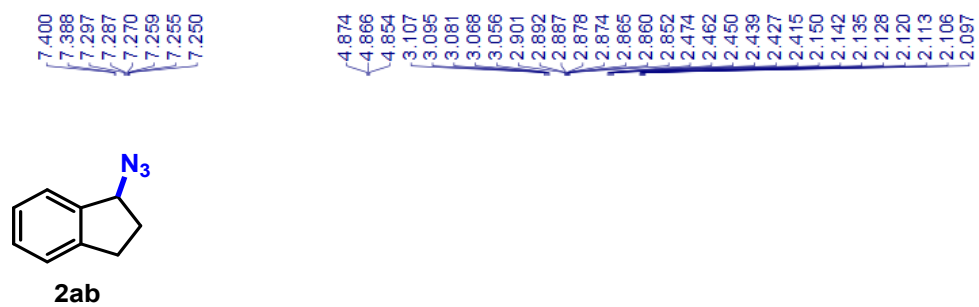

$^1\text{H}$  NMR (600 MHz,  $\text{CDCl}_3$ ) spectrum of **2ab**

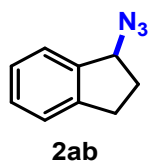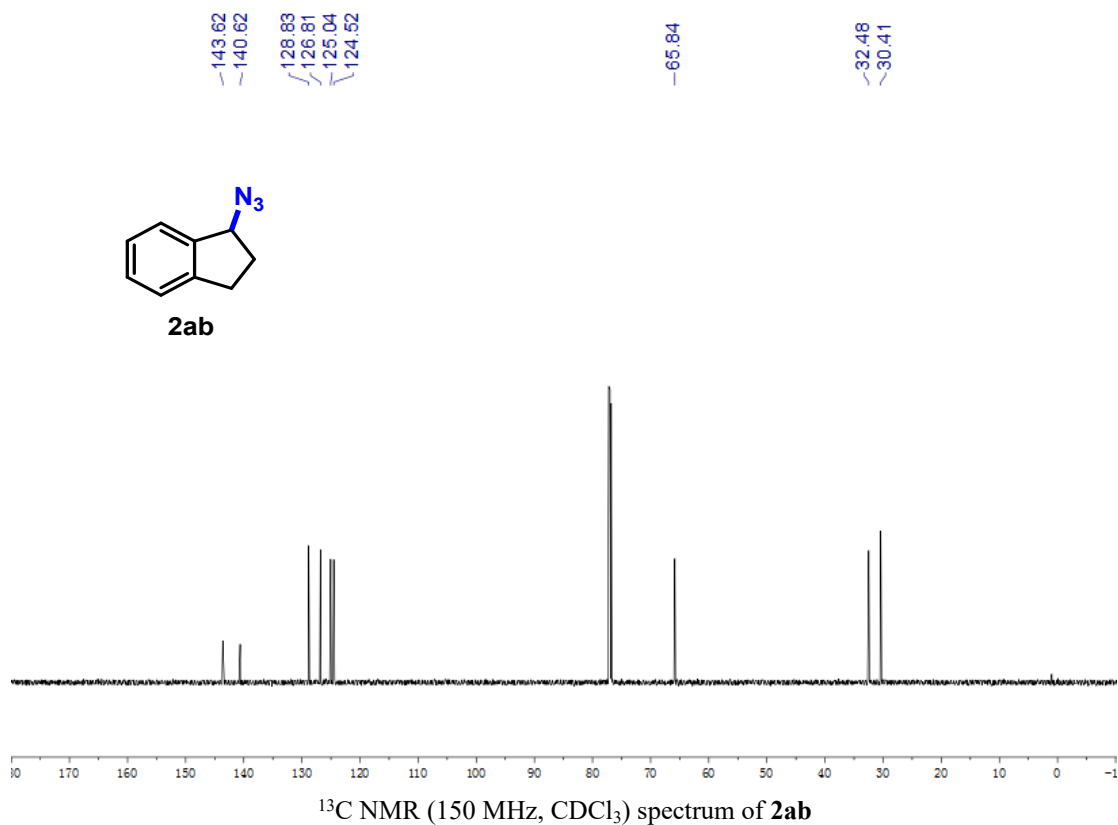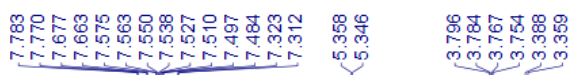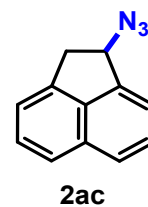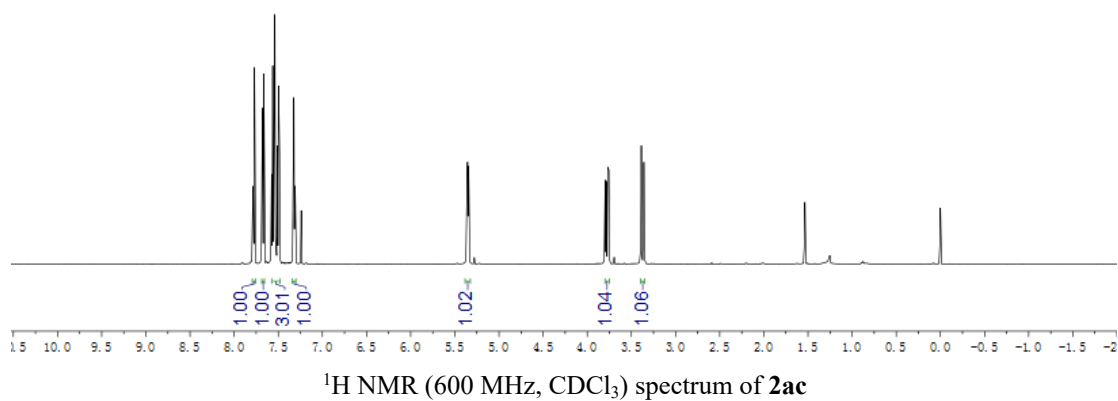



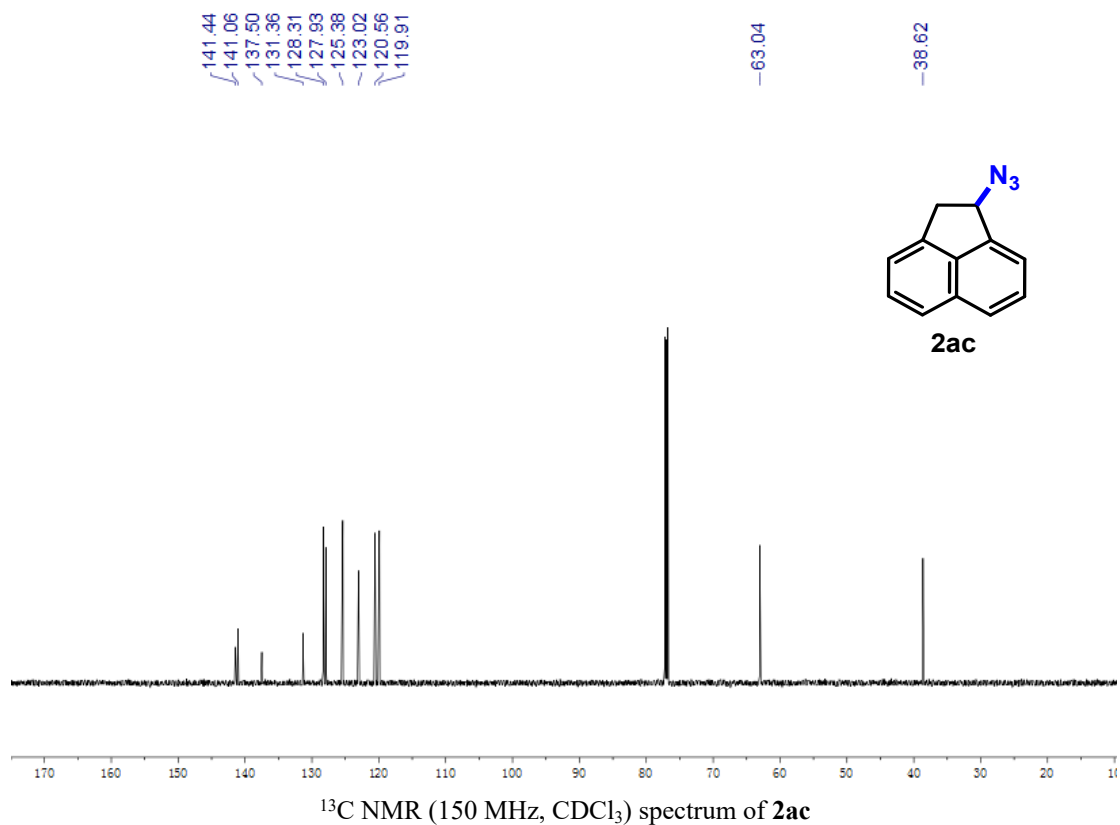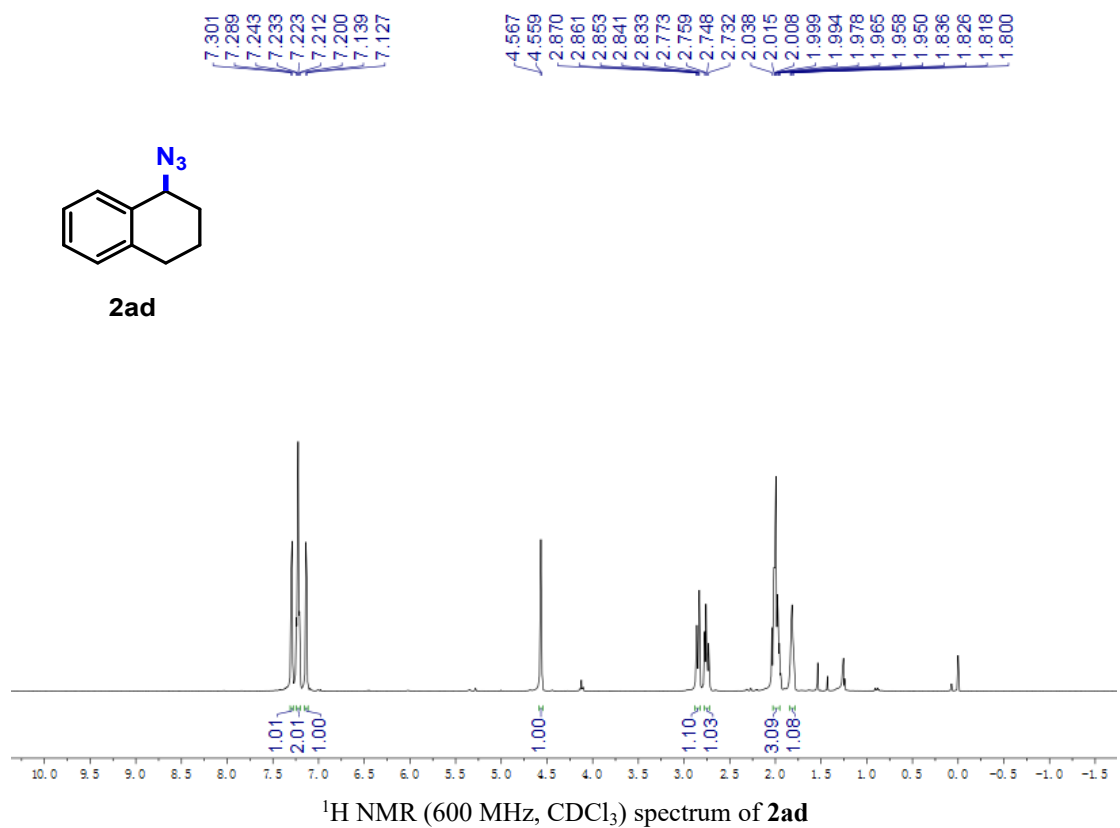

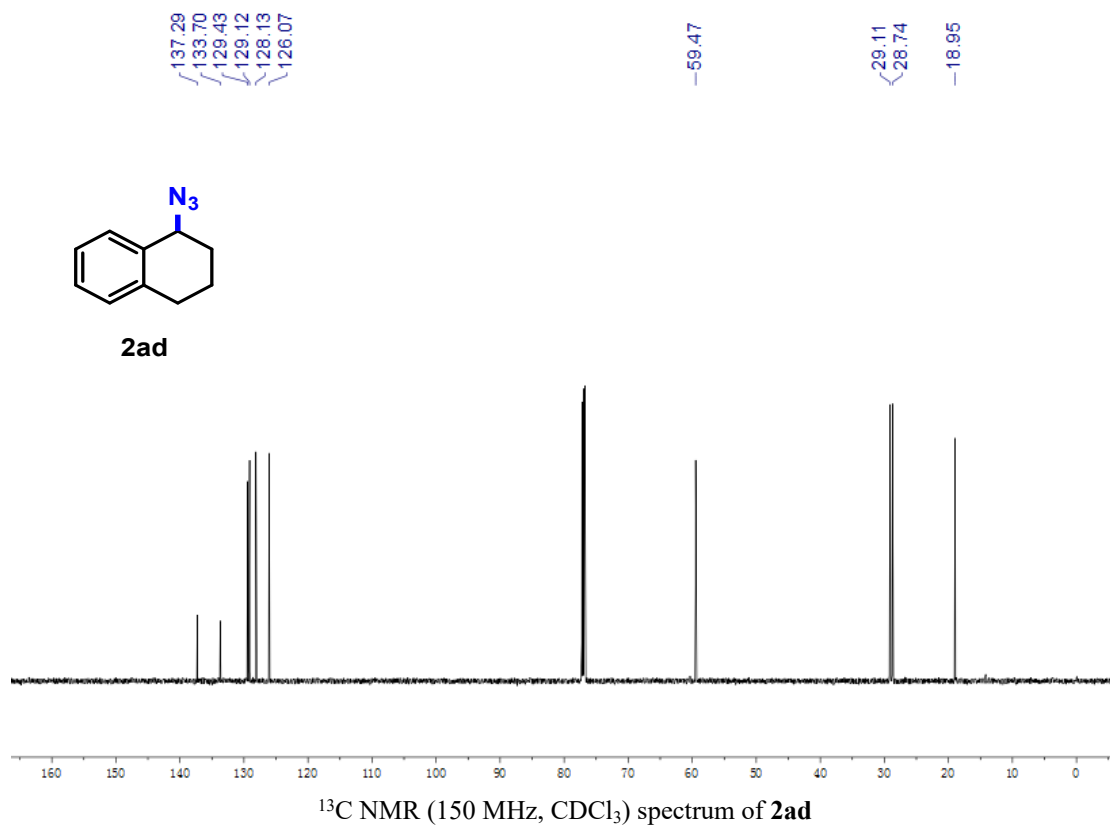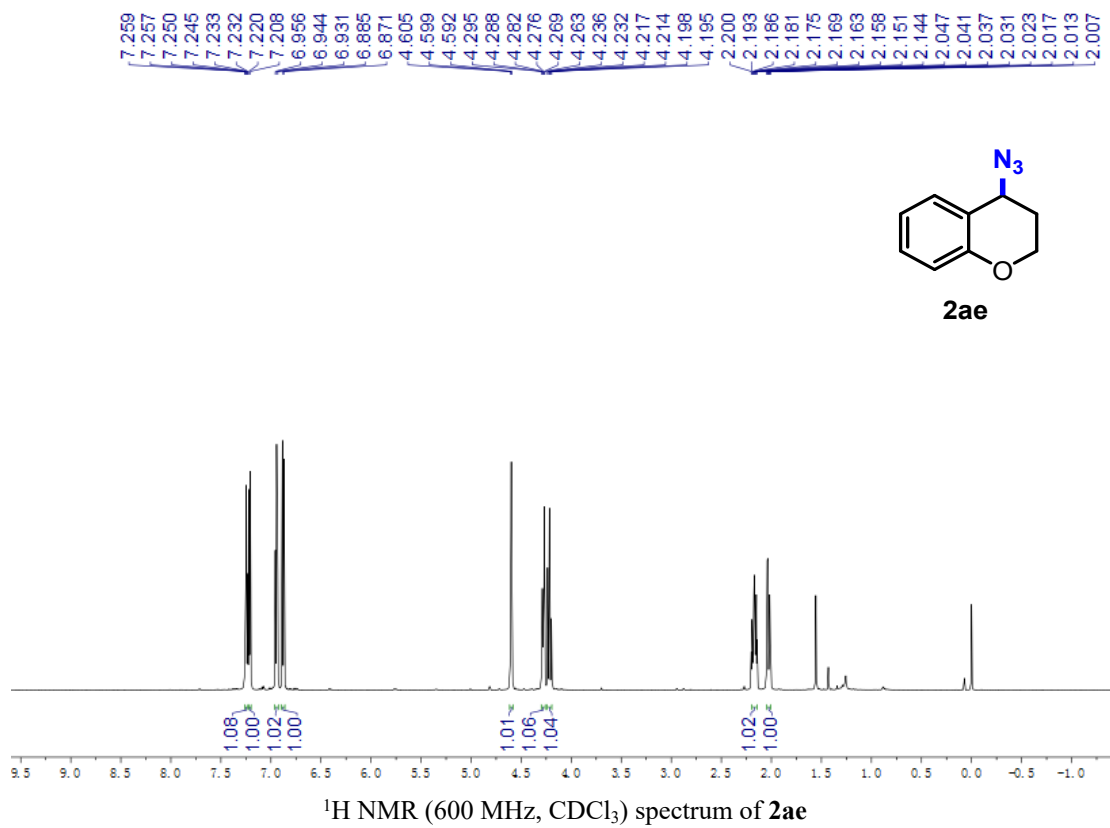

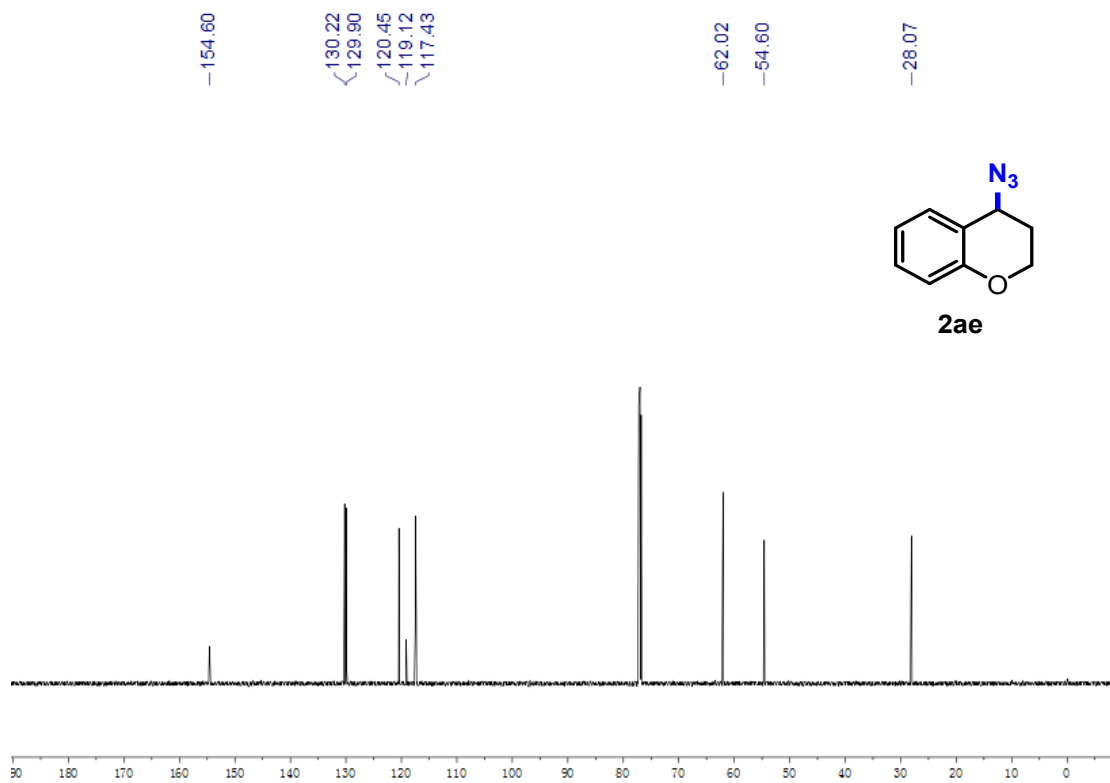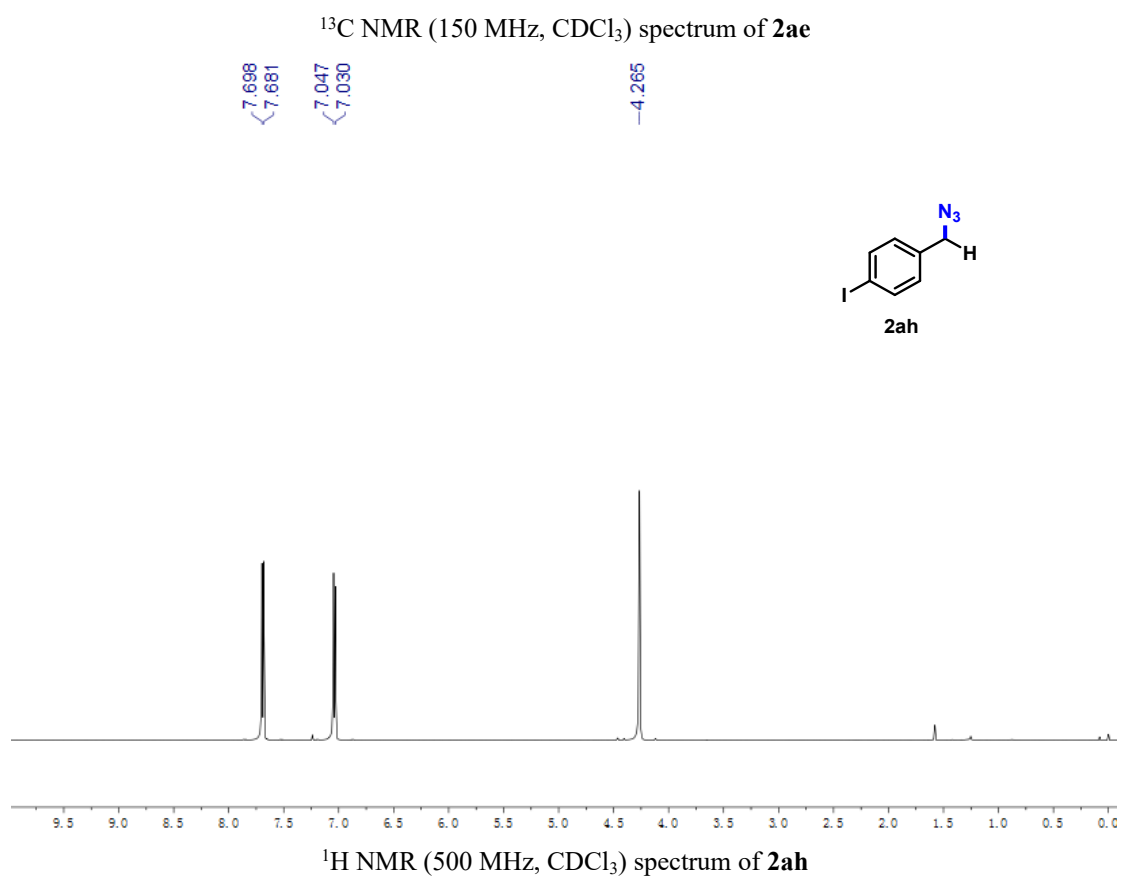

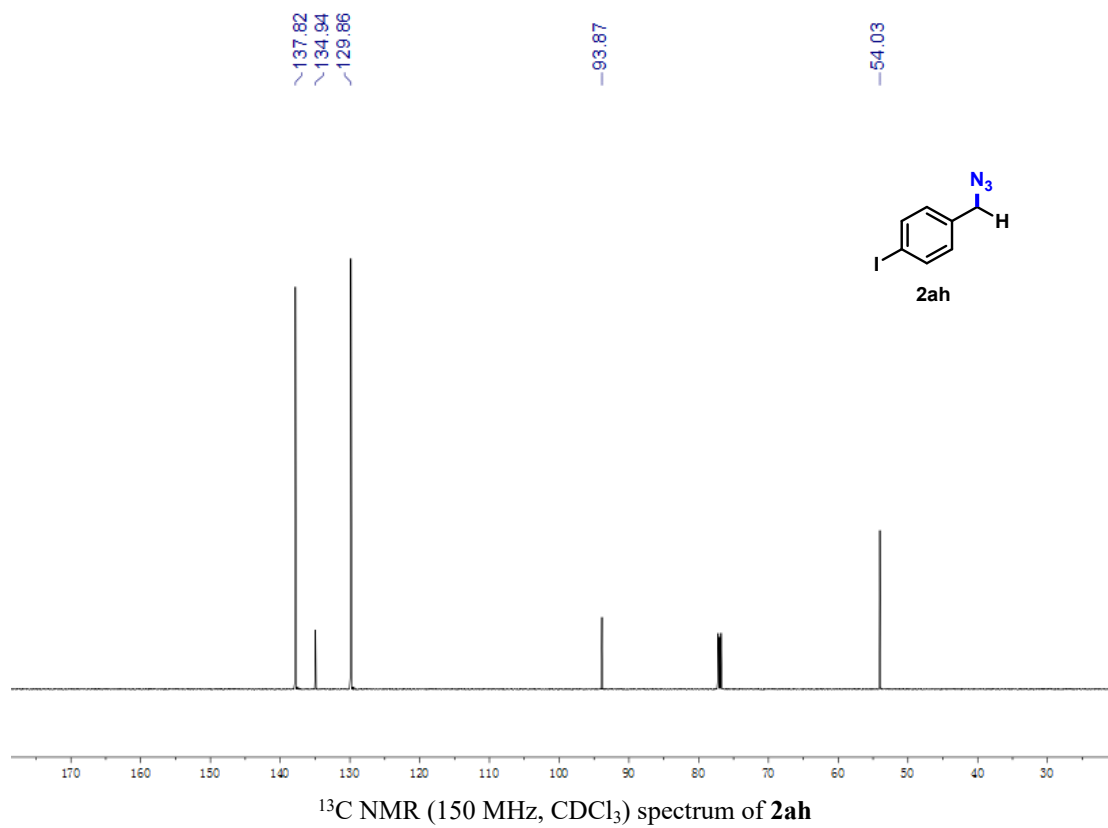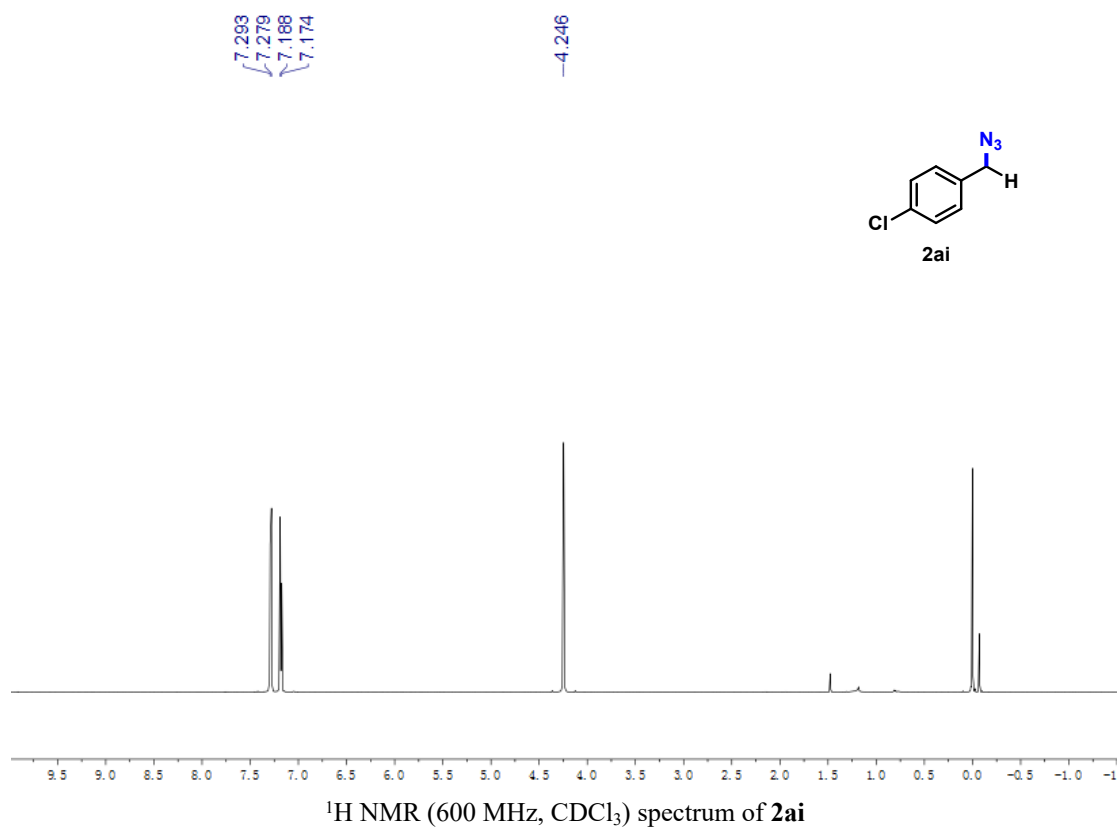

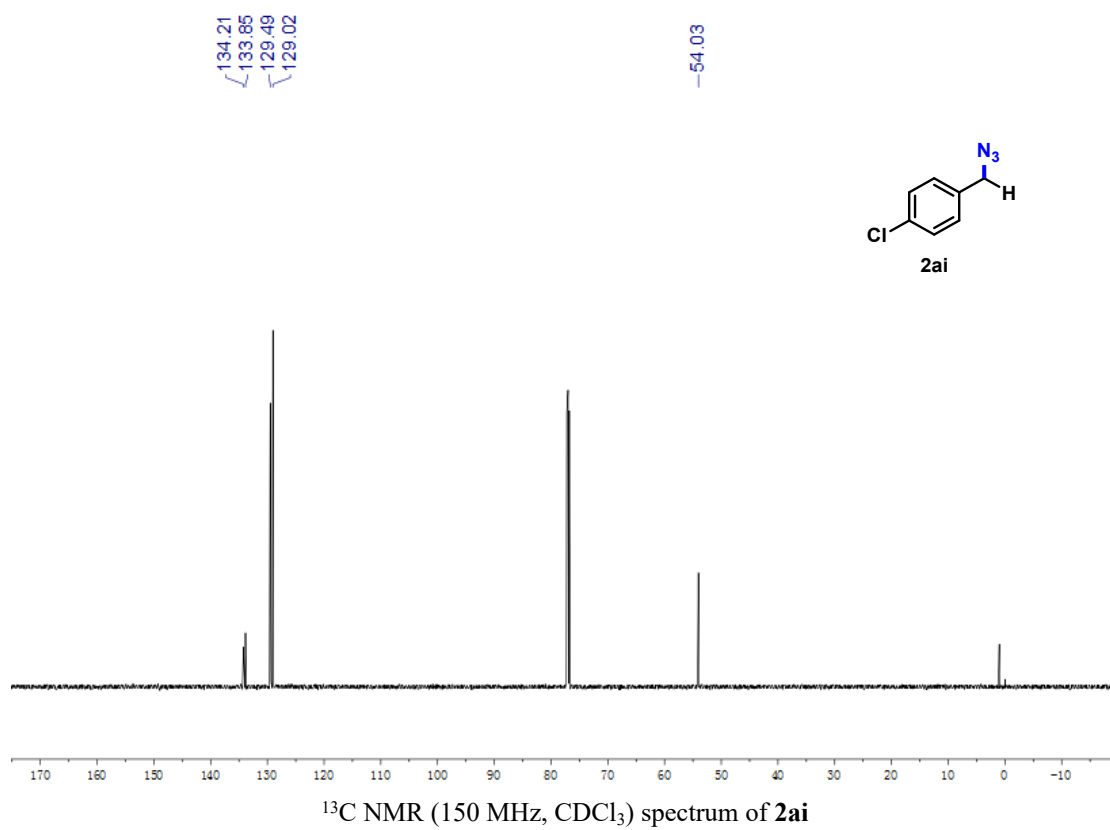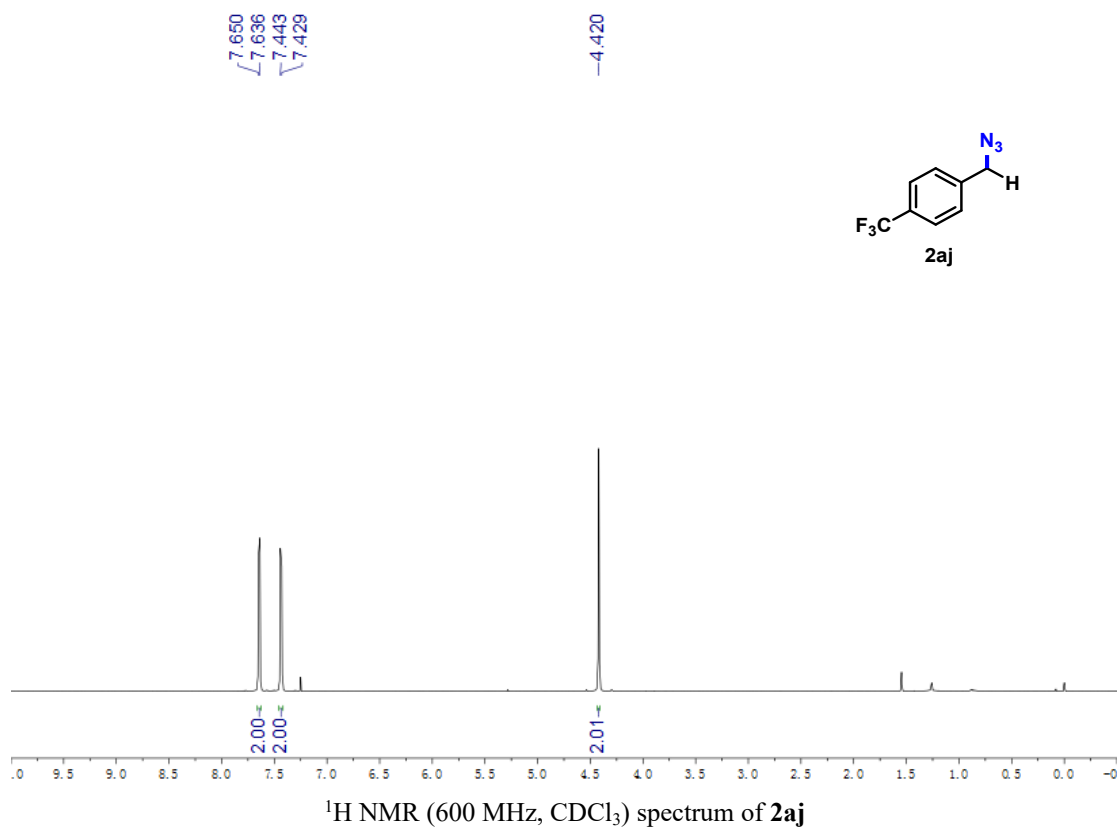

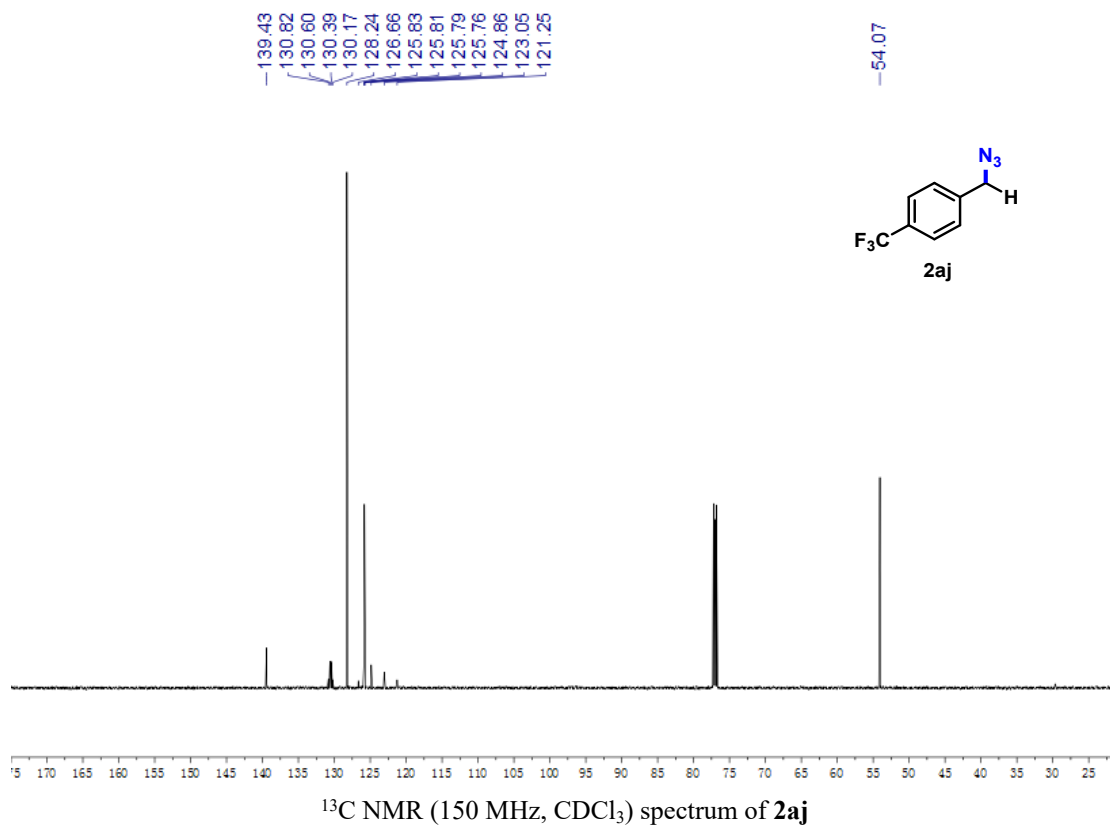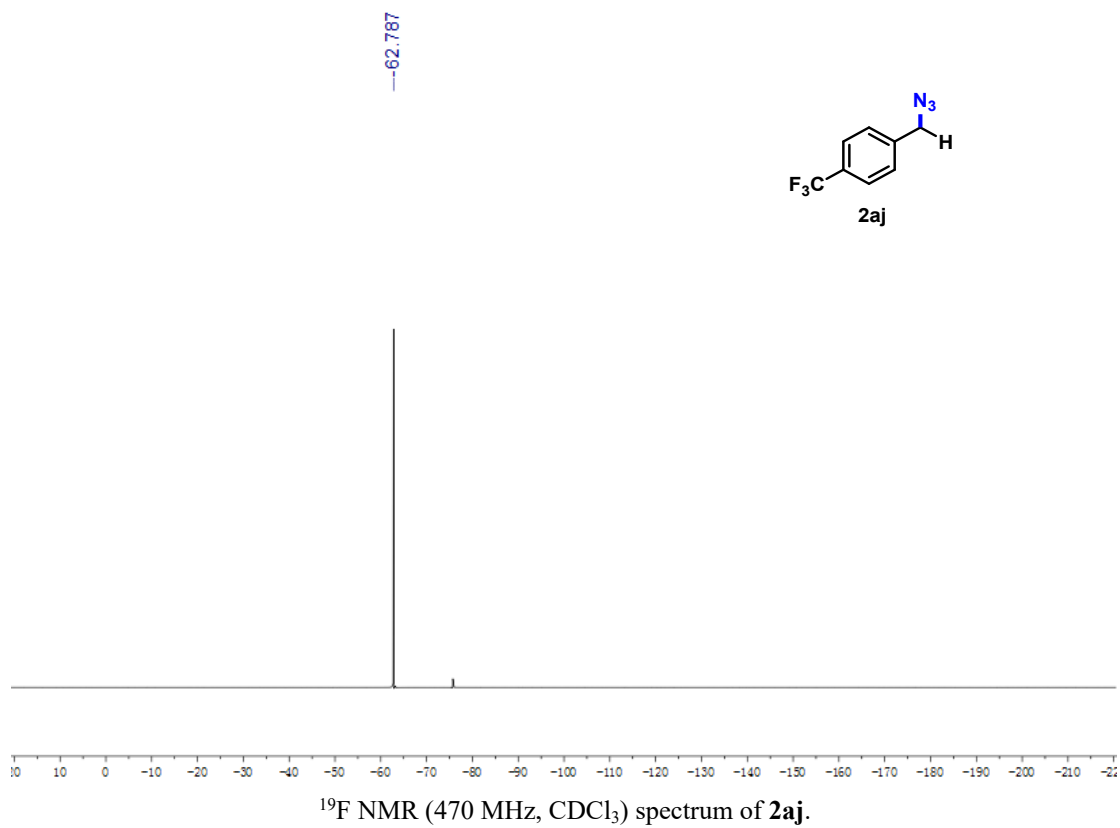

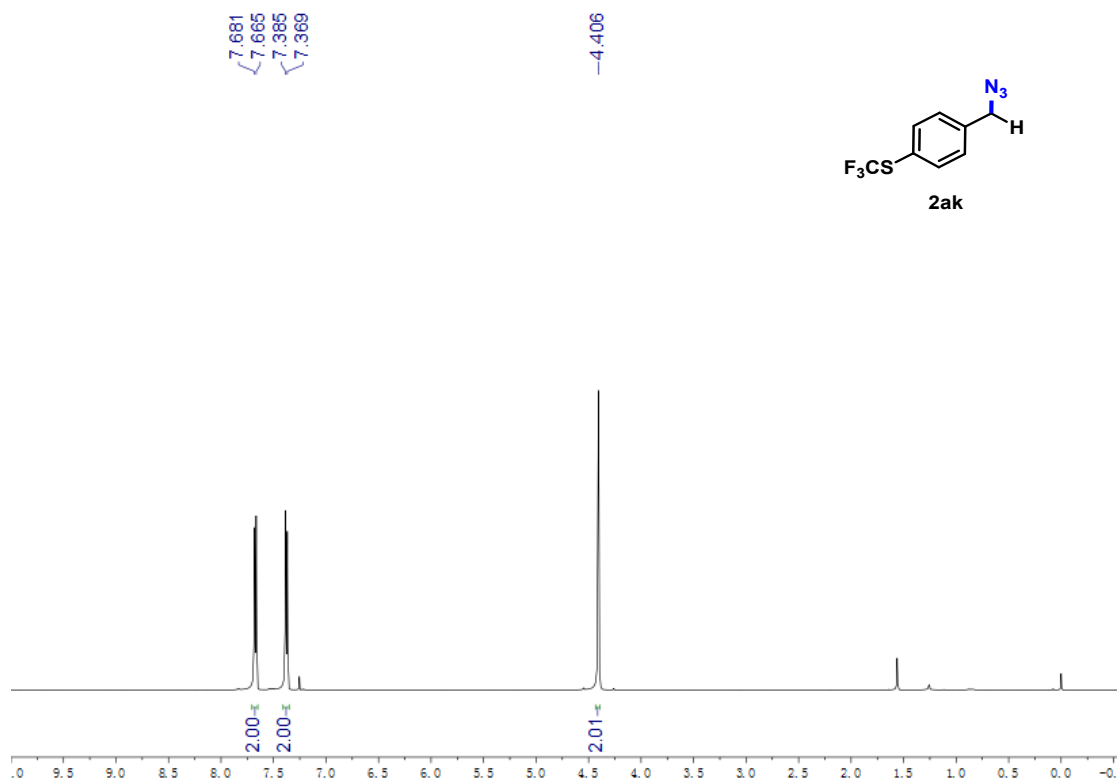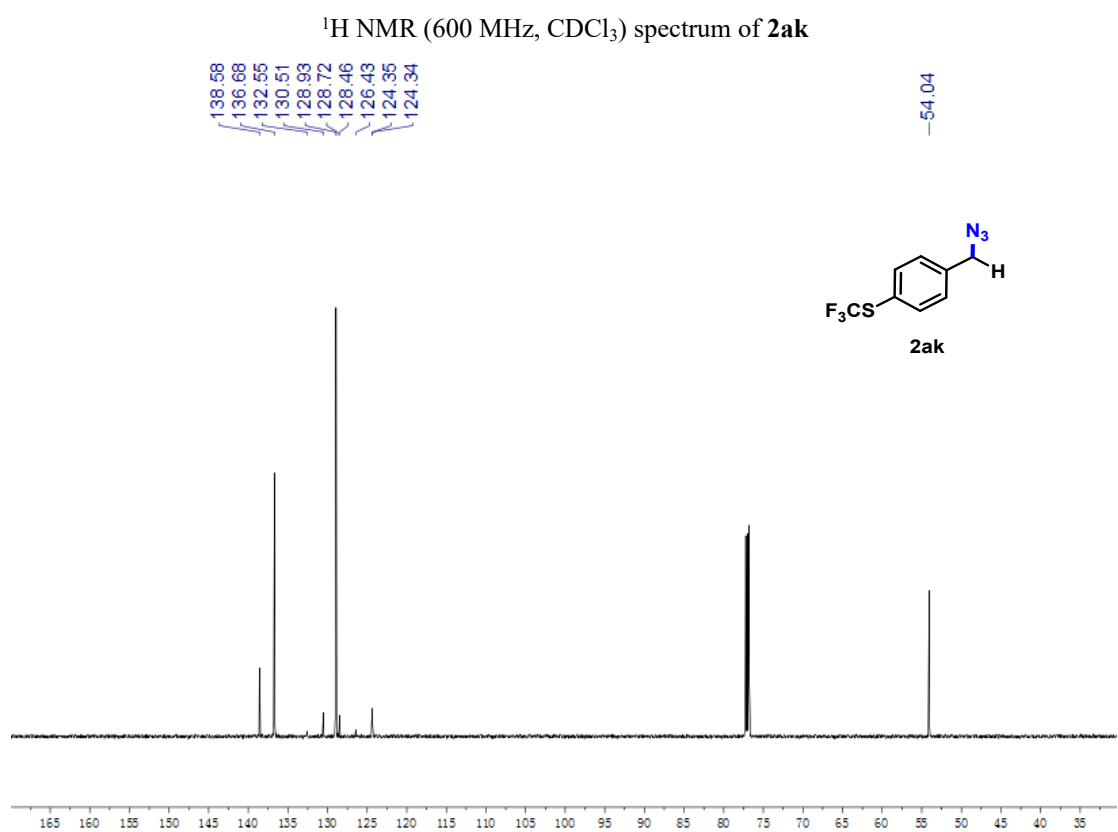

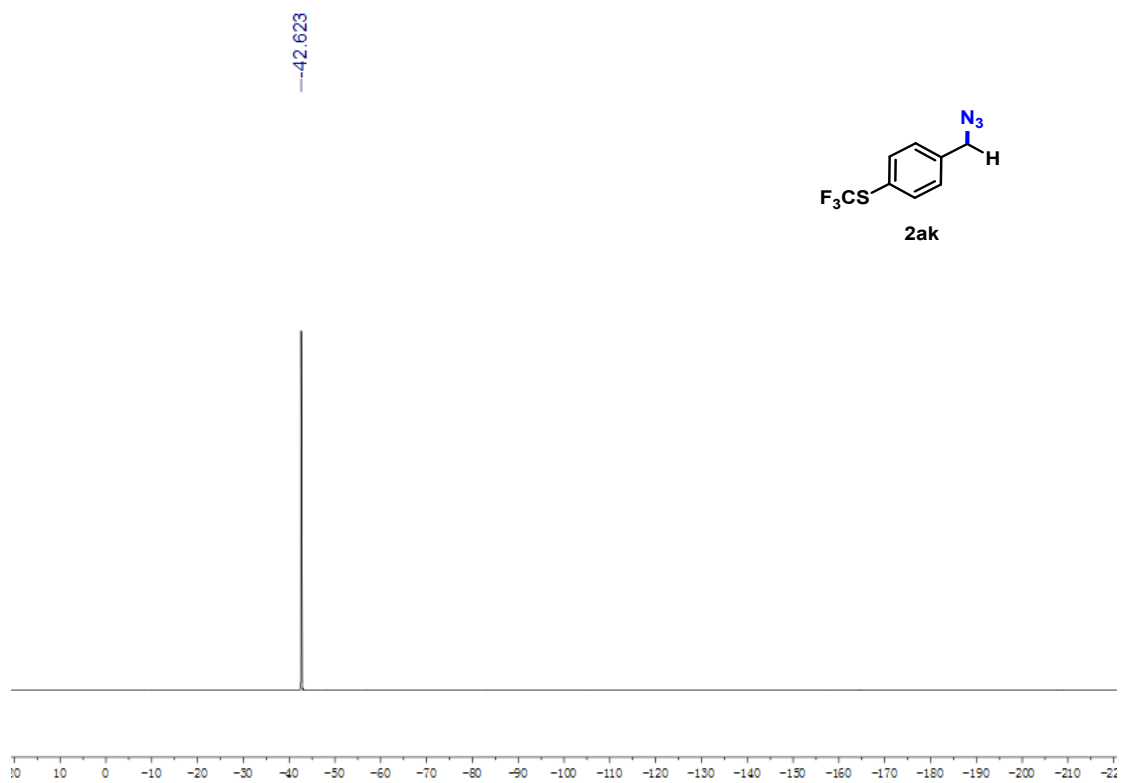

<sup>19</sup>F NMR (470 MHz, CDCl<sub>3</sub>) spectrum of **2ak**

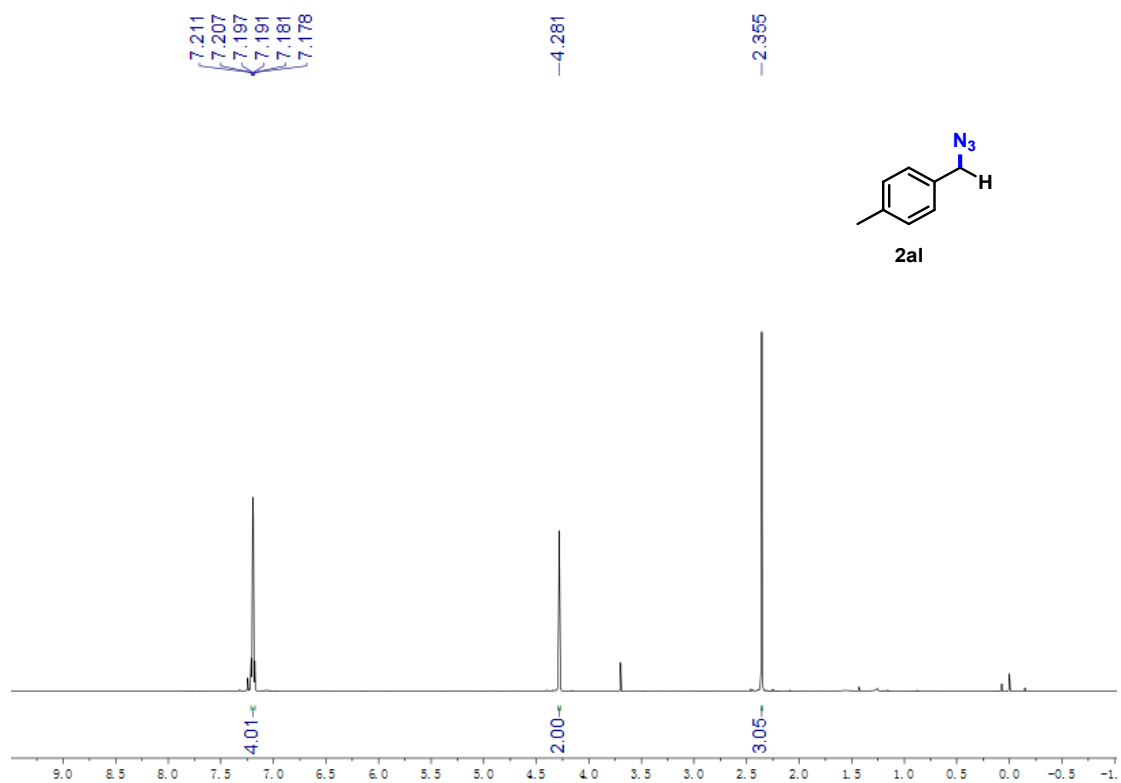

<sup>1</sup>H NMR (600 MHz, CDCl<sub>3</sub>) spectrum of **2al**



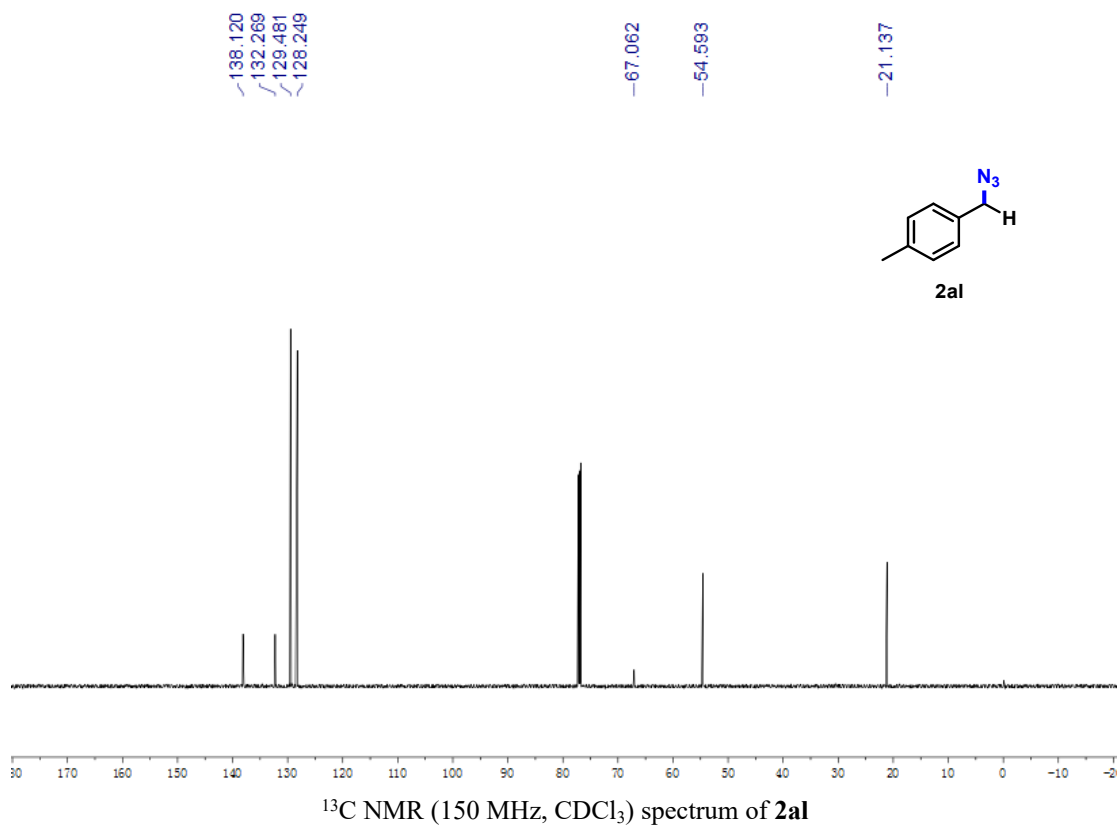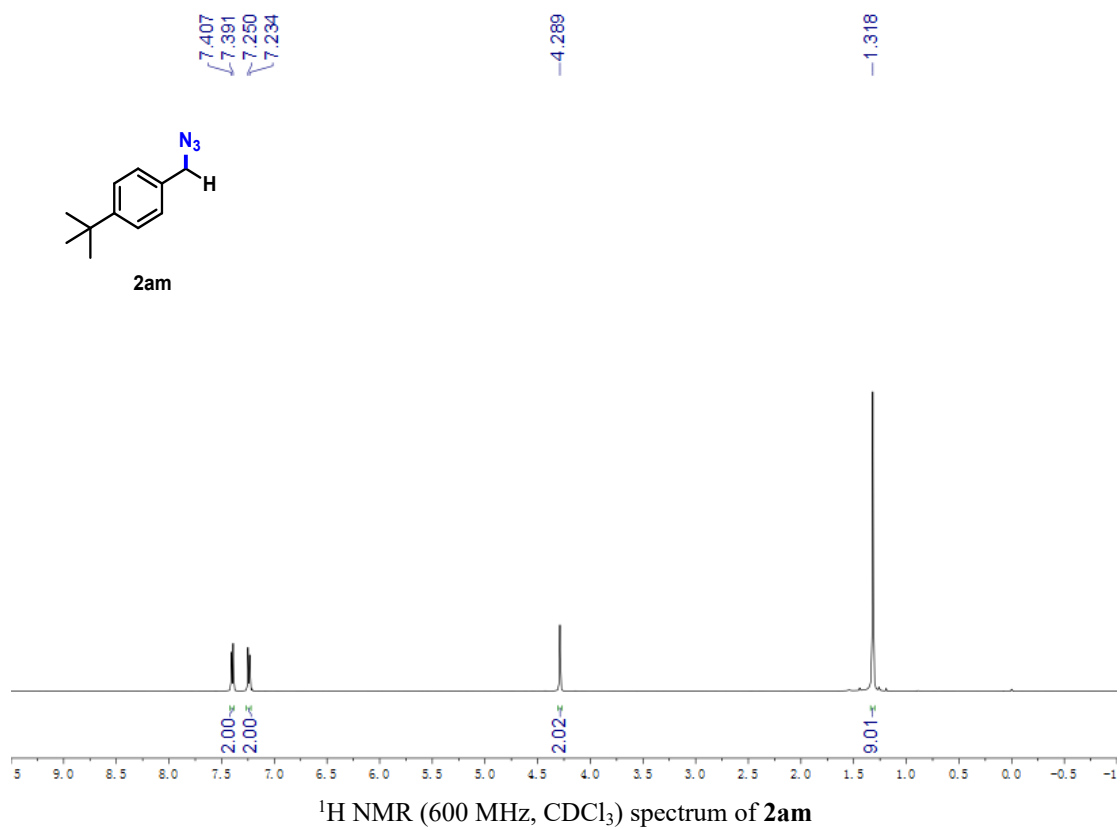

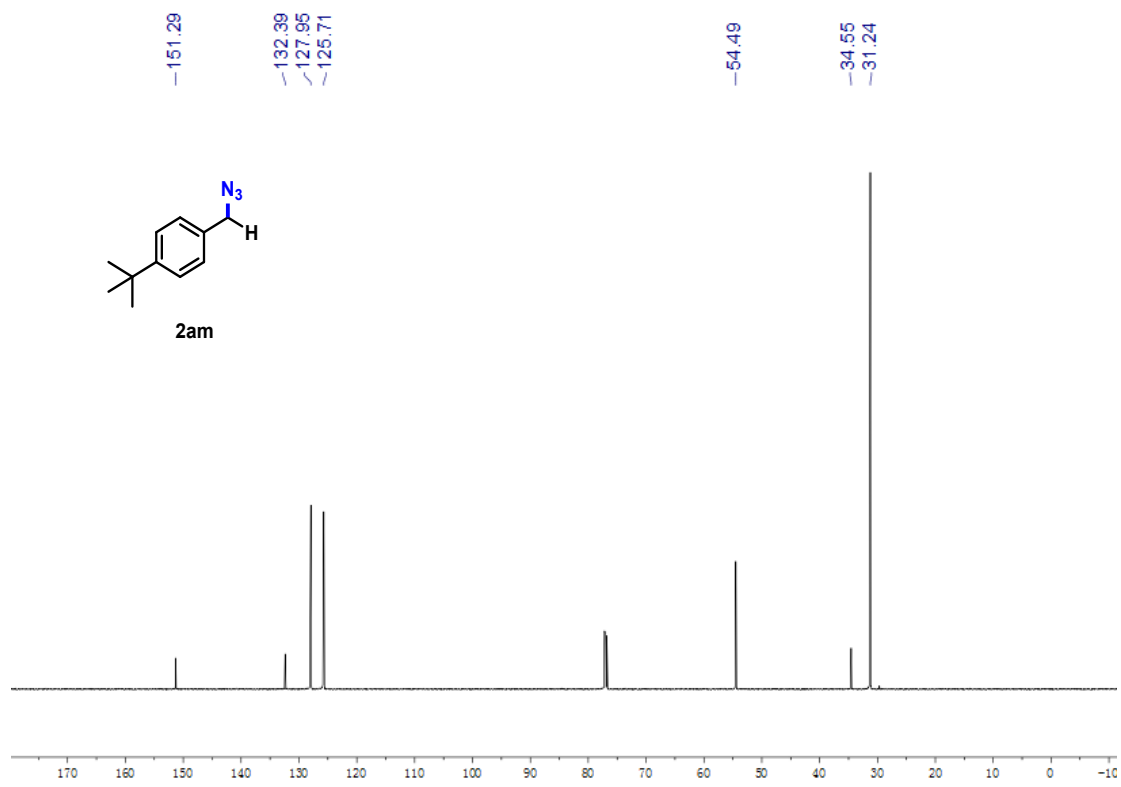

$^{13}\text{C}$  NMR (150 MHz,  $\text{CDCl}_3$ ) spectrum of **2am**

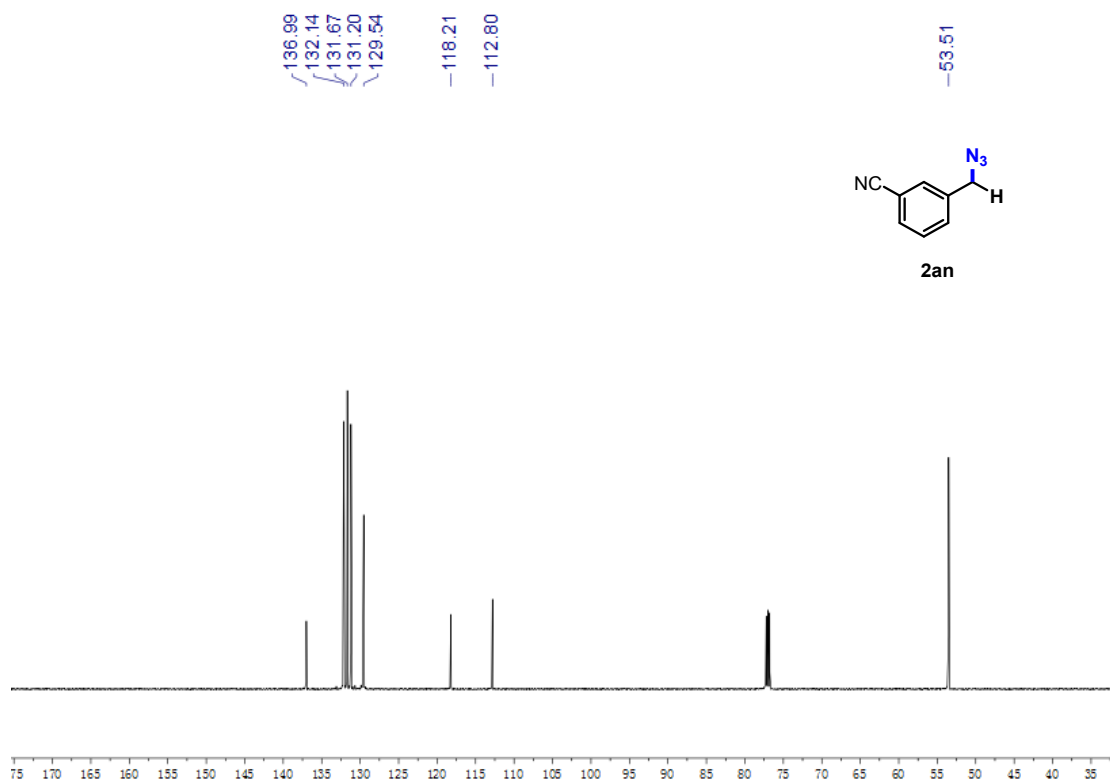

$^1\text{H}$  NMR (600 MHz,  $\text{CDCl}_3$ ) spectrum of **2an**

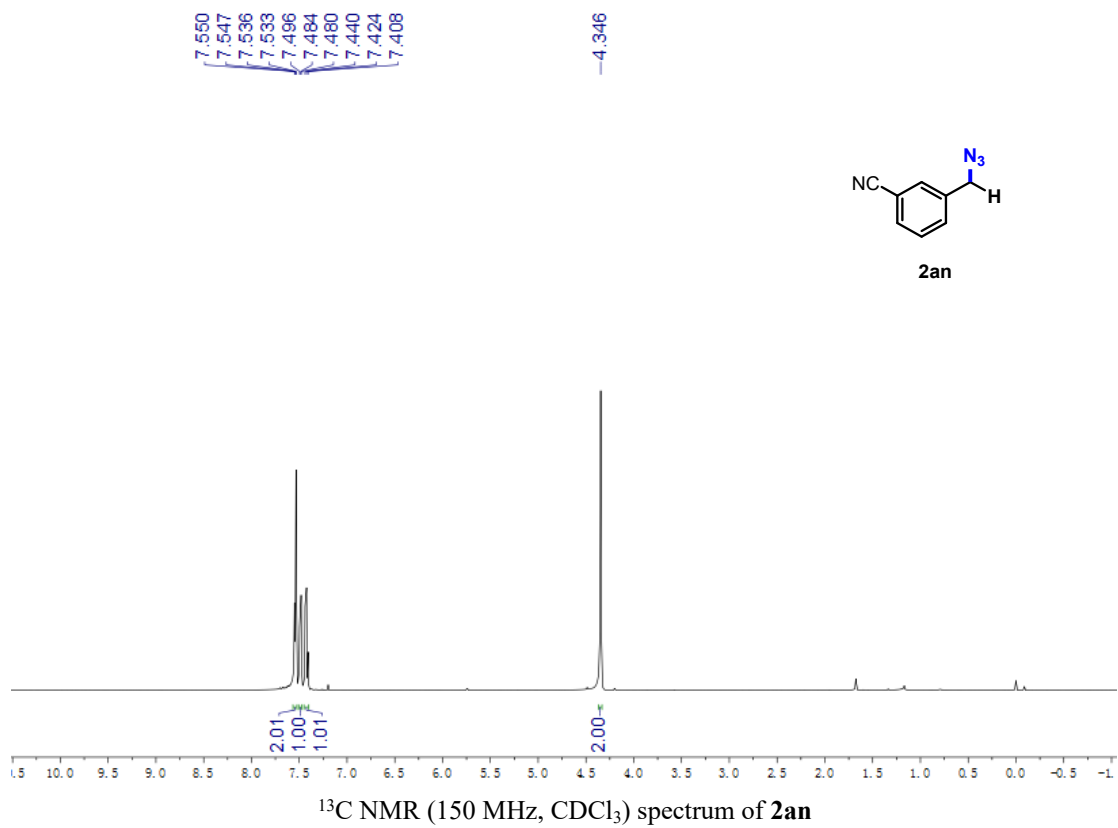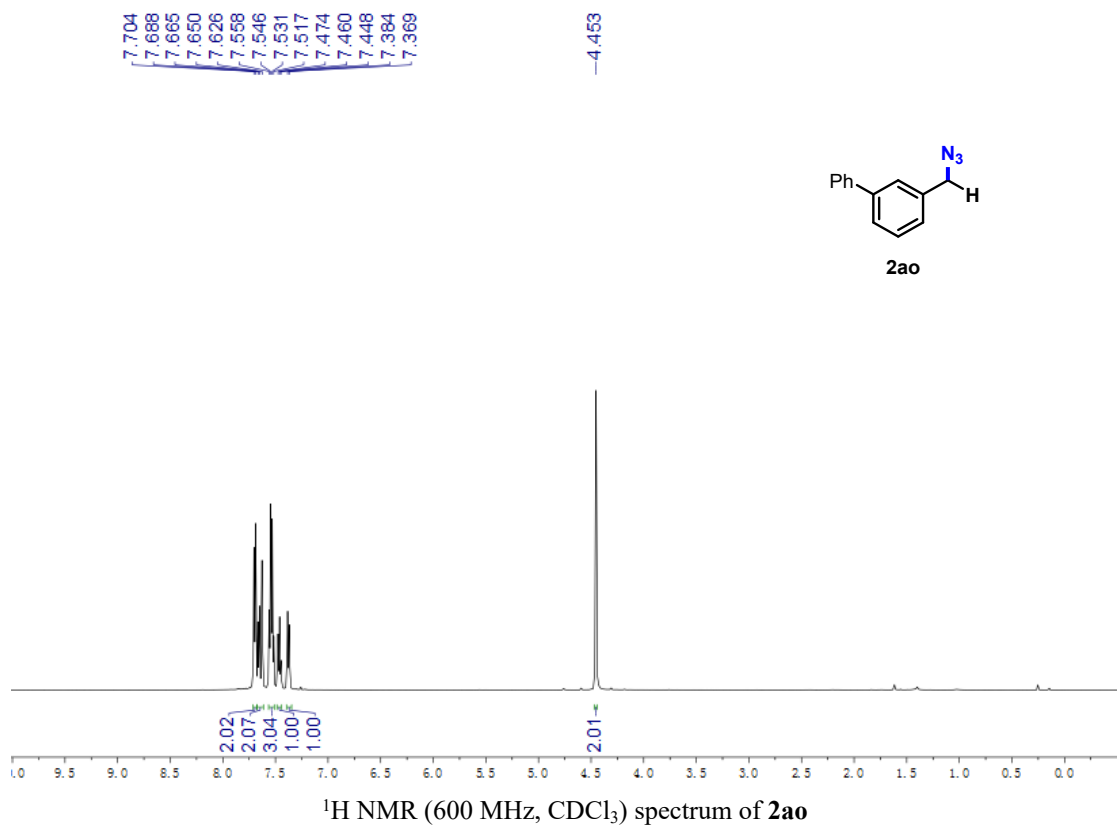

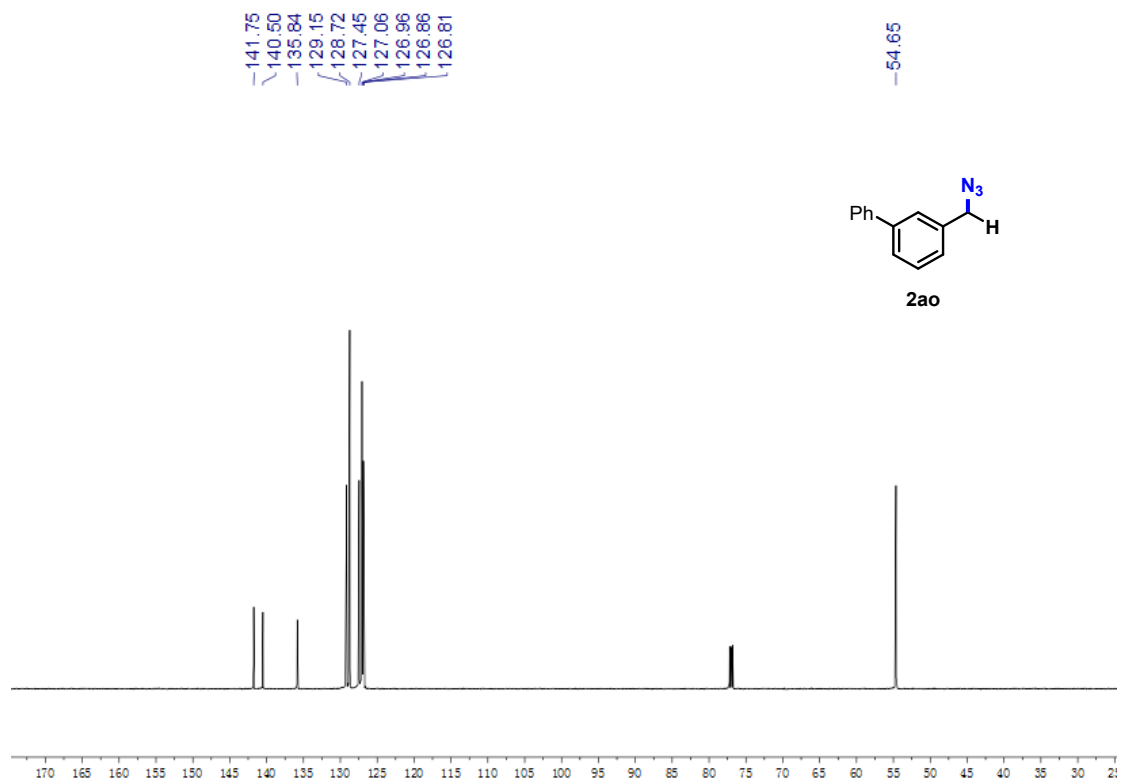

<sup>13</sup>C NMR (150 MHz, CDCl<sub>3</sub>) spectrum of **2ao**

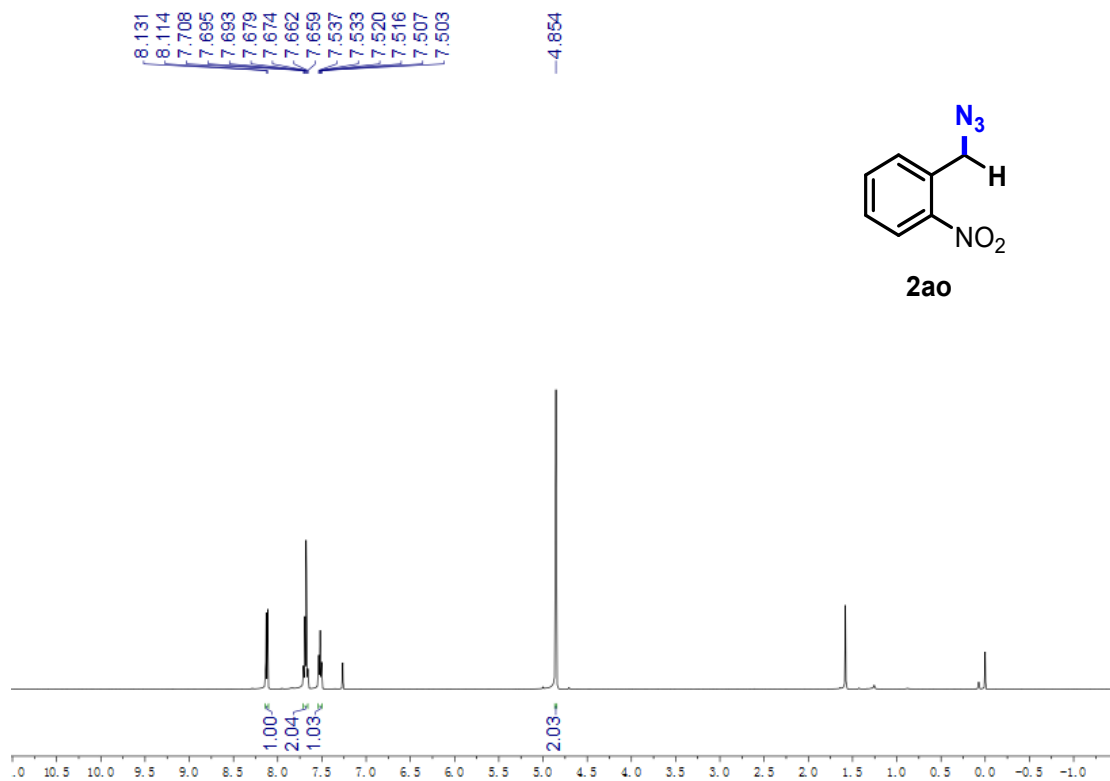

<sup>1</sup>H NMR (600 MHz, CDCl<sub>3</sub>) spectrum of **2ao**

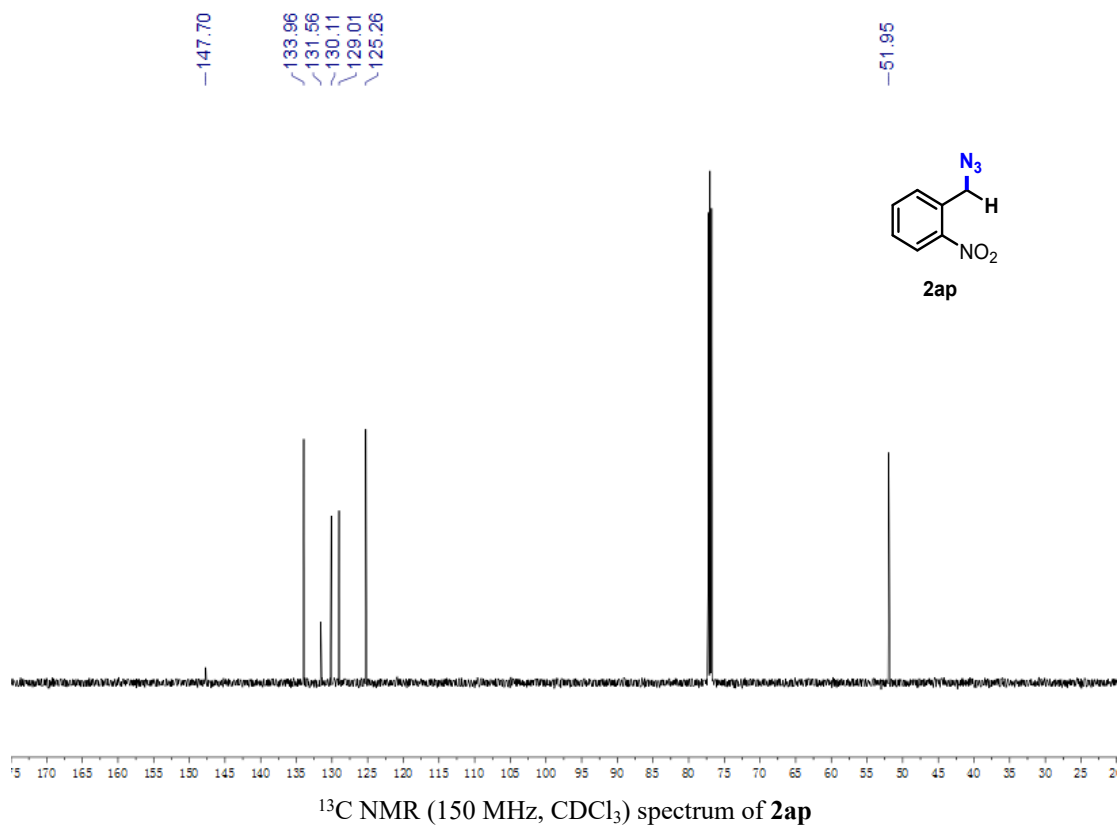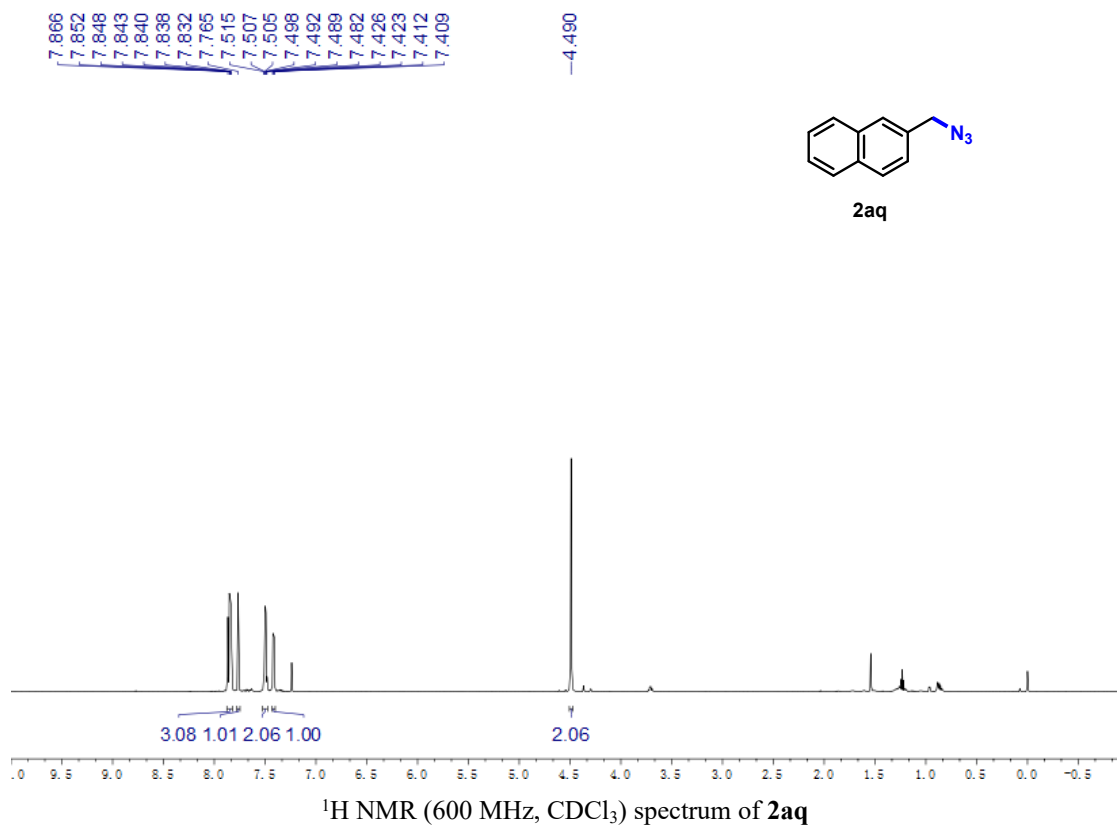

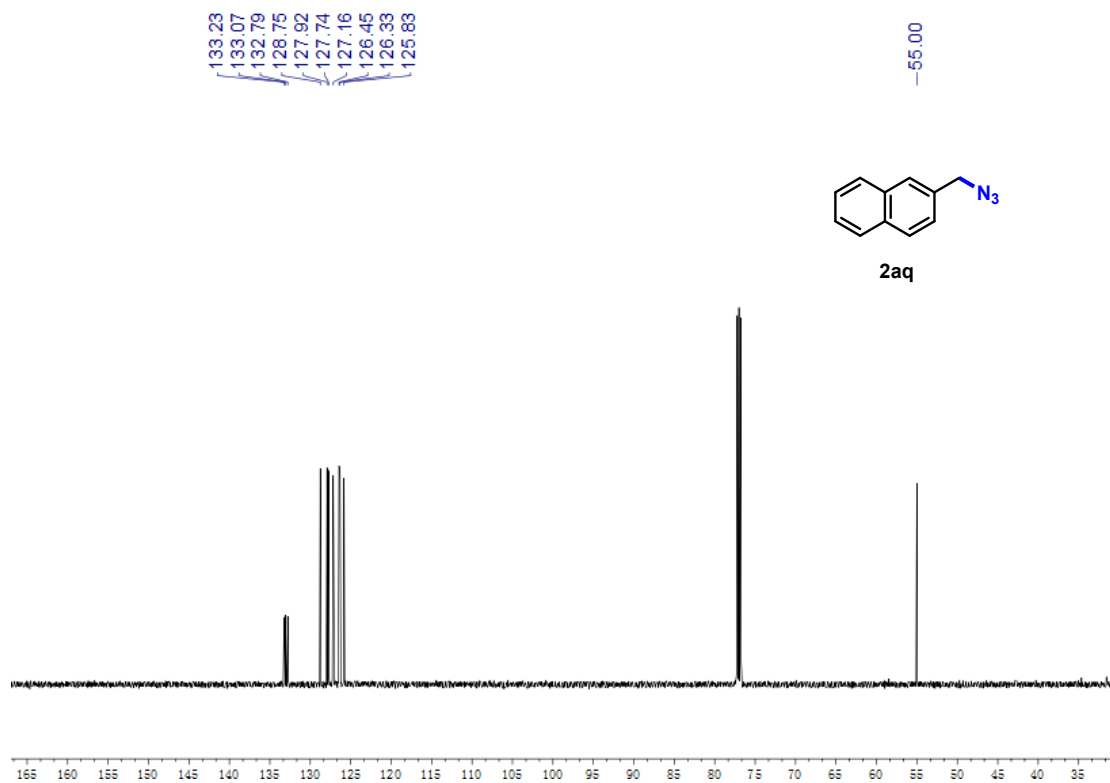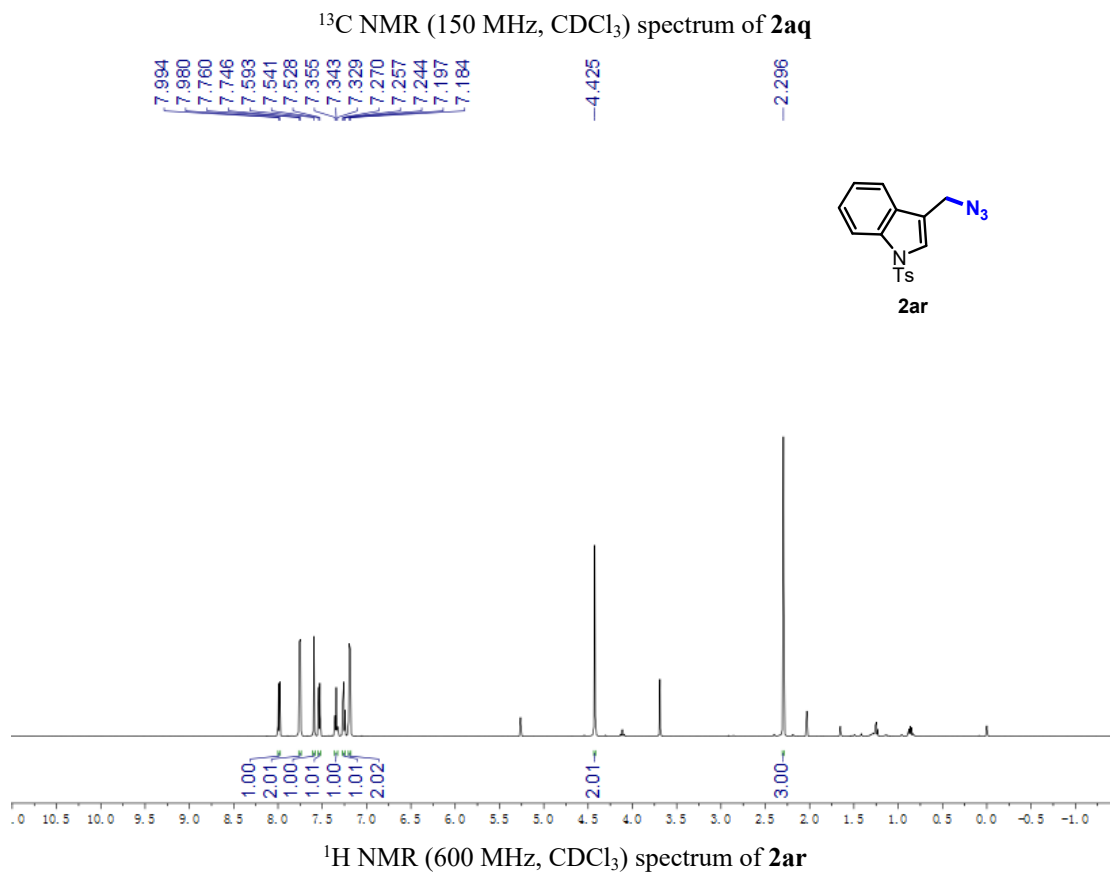

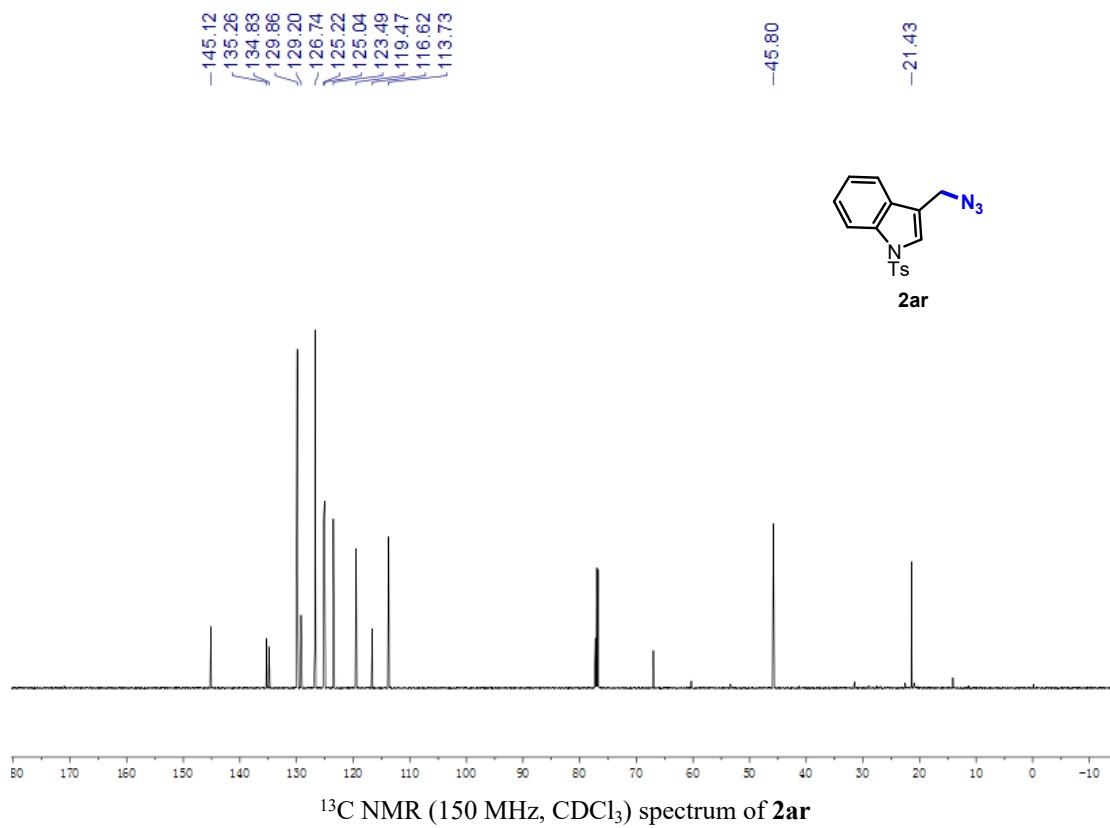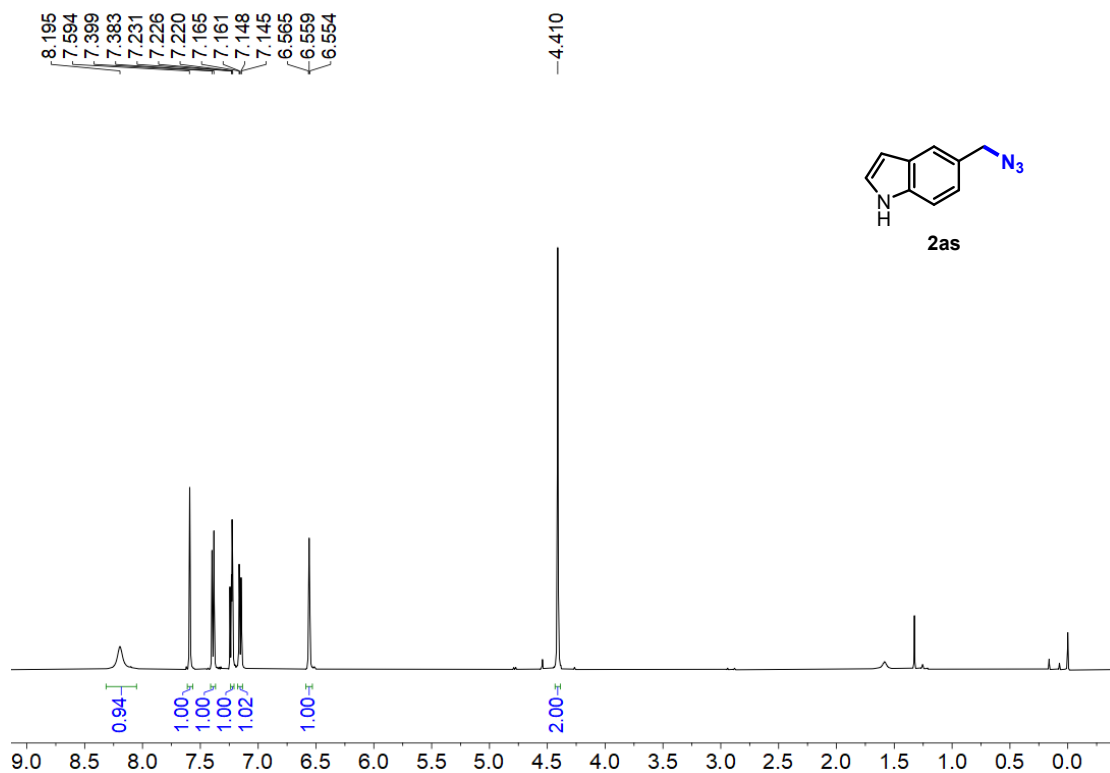

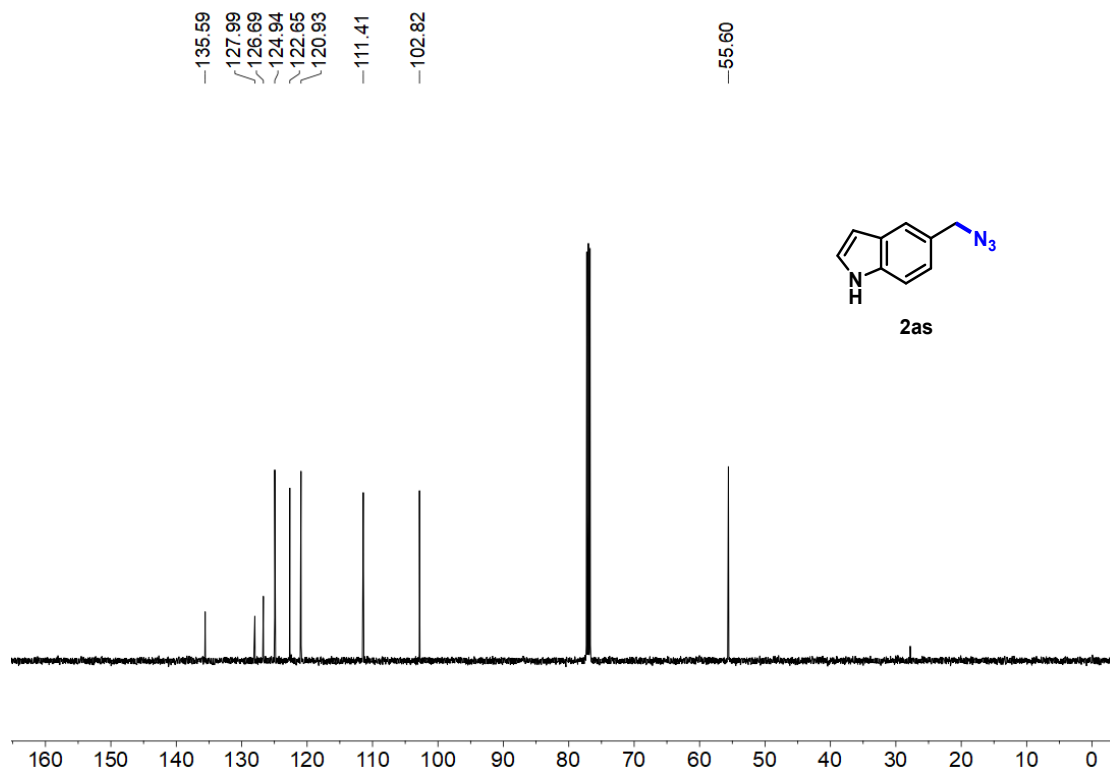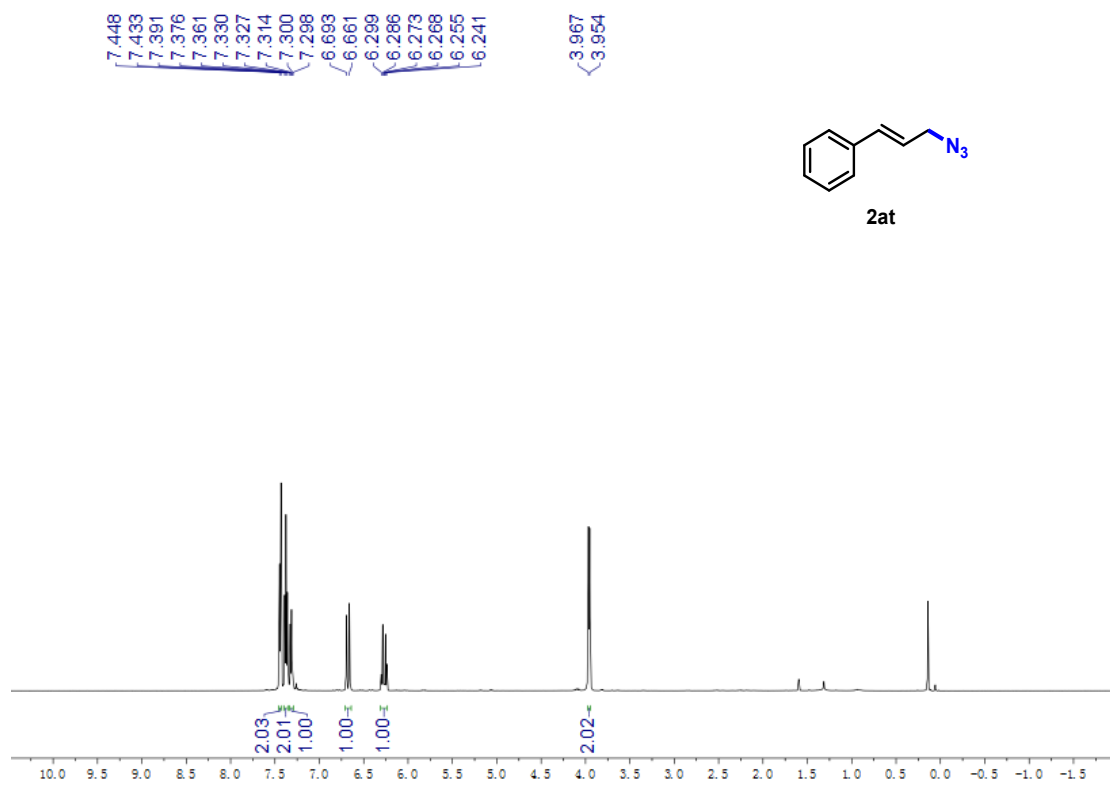

<sup>1</sup>H NMR (600 MHz, CDCl<sub>3</sub>) spectrum of **2at**



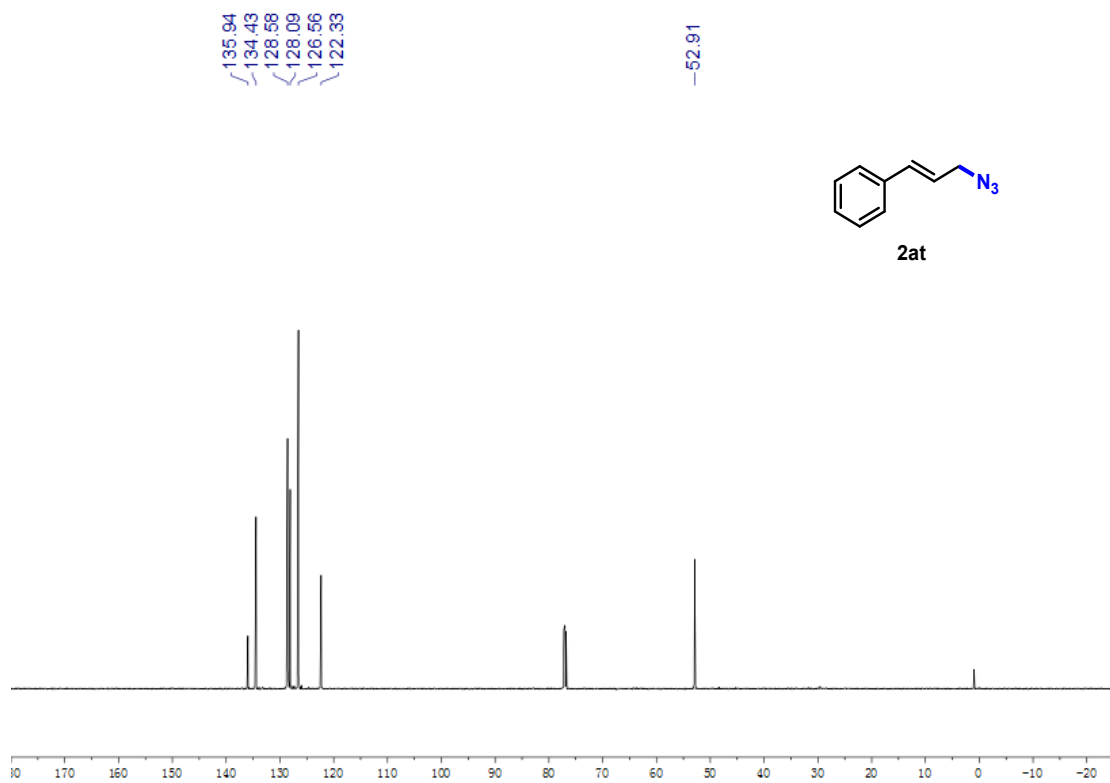

<sup>13</sup>C NMR (150 MHz, CDCl<sub>3</sub>) spectrum of **2at**

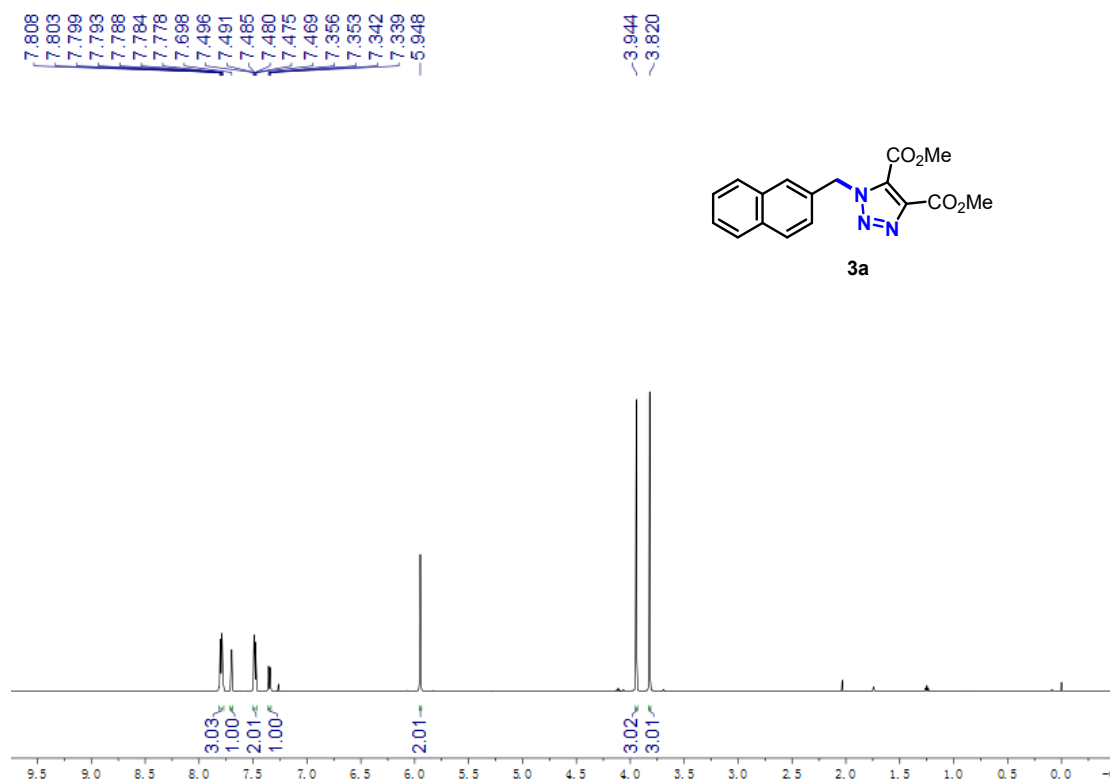

<sup>1</sup>H NMR (600 MHz, CDCl<sub>3</sub>) spectrum of **3a**

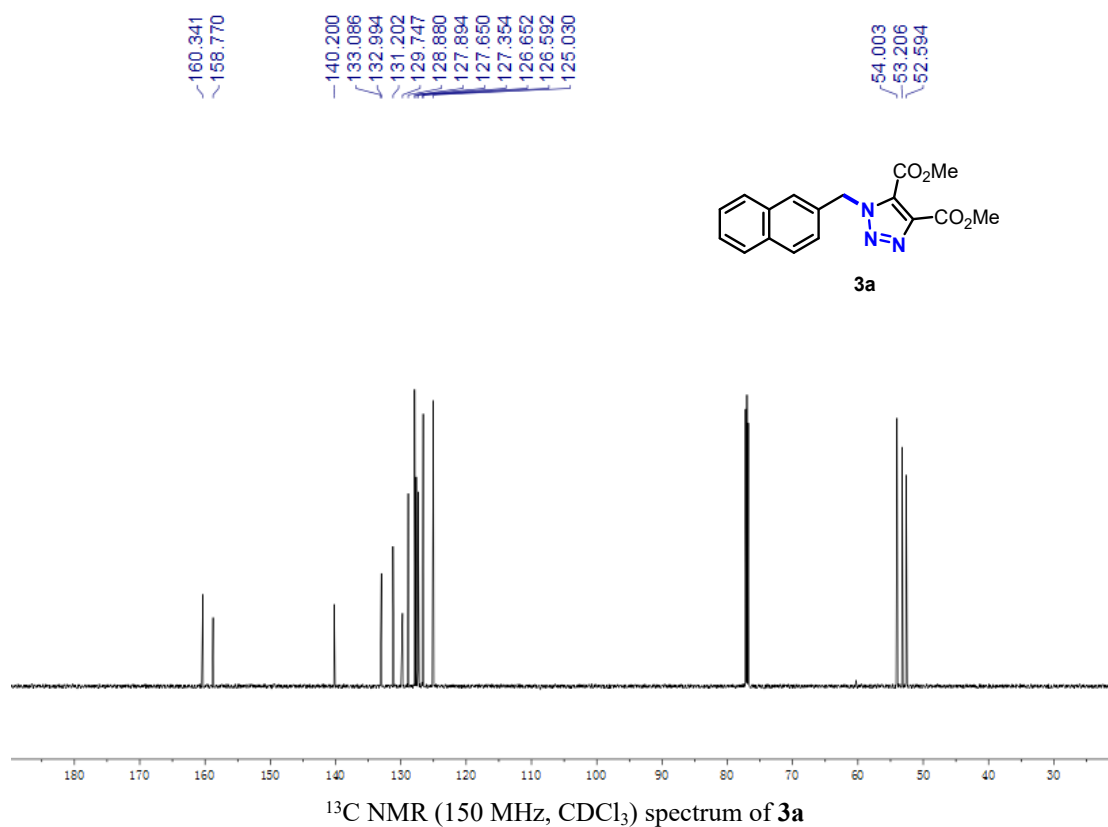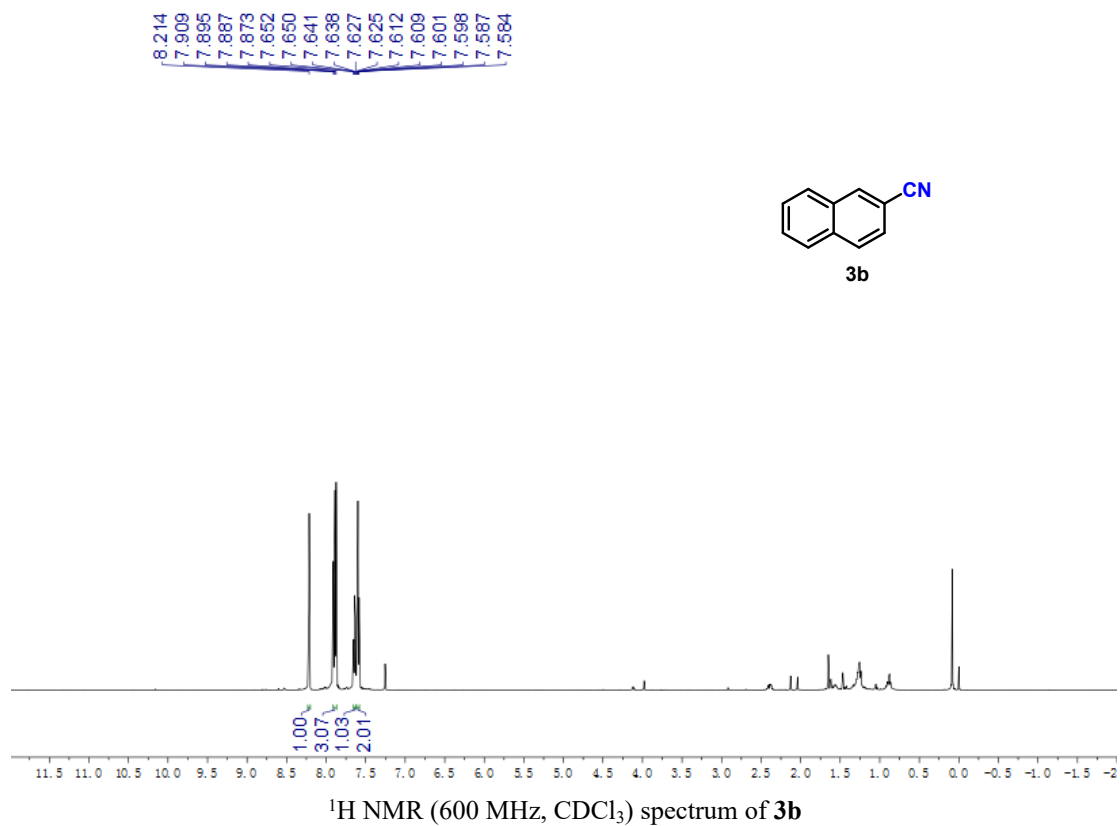

134.59  
134.10  
132.19  
129.14  
128.99  
128.35  
128.00  
127.61  
126.28  
119.20  
109.32

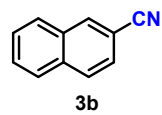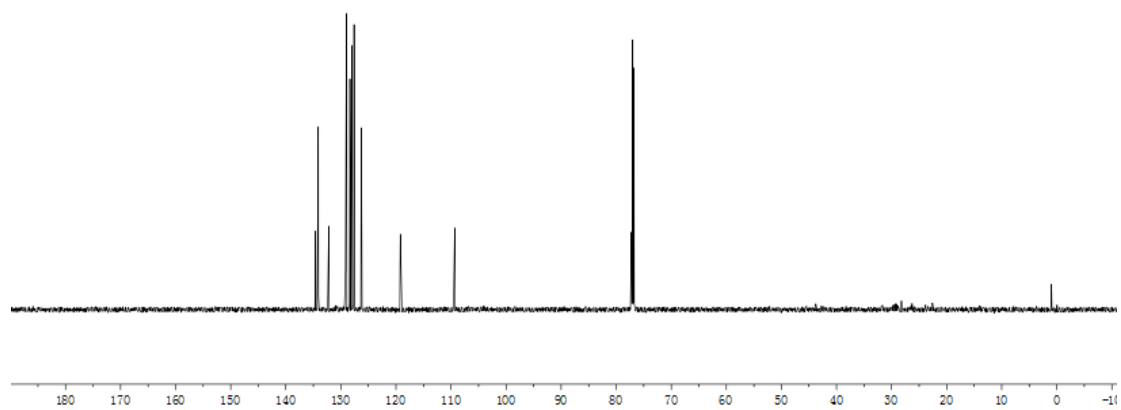

<sup>13</sup>C NMR (150 MHz, CDCl<sub>3</sub>) spectrum of **3b**

## 6. References

- [1]. Gaussian 16 Revision C.01, M. J. Frisch, G. W. Trucks, H. B. Schlegel, G. E. Scuseria, M. A. Robb, J. R. Cheeseman, G. Scalmani, V. Barone, G. A. Petersson, H. Nakatsuji, X. Li, M. Caricato, A. V. Marenich, J. Bloino, B. G. Janesko, R. Gomperts, B. Mennucci, H. P. Hratchian, J. V. Ortiz, A. F. Izmaylov, J. L. Sonnenberg, D. Williams-Young, F. Ding, F. Lipparini, F. Egidi, J. Goings, B. Peng, A. Petrone, T. Henderson, D. Ranasinghe, V. G. Zakrzewski, J. Gao, N. Rega, G. Zheng, W. Liang, M. Hada, M. Ehara, K. Toyota, R. Fukuda, J. Hasegawa, M. Ishida, T. Nakajima, Y. Honda, O. Kitao, H. Nakai, T. Vreven, K. Throssell, J. A. Montgomery, Jr., J. E. Peralta, F. Ogliaro, M. J. Bearpark, J. J. Heyd, E. N. Brothers, K. N. Kudin, V. N. Staroverov, T. A. Keith, R. Kobayashi, J. Normand, K. Raghavachari, A. P. Rendell, J. C. Burant, S. S. Iyengar, J. Tomasi, M. Cossi, J. M. Millam, M. Klene, C. Adamo, R. Cammi, J. W. Ochterski, R. L. Martin, K. Morokuma, O. Farkas, J. B. Foresman, and D. J. Fox, Gaussian, Inc., Wallingford CT, **2019**.
- [2]. A. D. Becke, *J. Chem. Phys.*, **1993**, *98*, 5648.
- [3]. J. P. Perdew, Y. Wang, *Phys. Rev. B*, **1992**, *45*, 13244.
- [4]. S. Grimme, S. Ehrlich and L. Goerigk, *J. Comp. Chem.*, **2011**, *32*, 1456.
- [5] G. A. Petersson, A. Bennett, T. G. Tensfeldt, M. A. Al-Laham, W. A. Shirley, and J. Mantzaris, *J. Chem. Phys.*, 1988, *89*, 2193.
- [6] A. Petersson, M. A. Al-Laham, *J. Chem. Phys.*, 1991, *94*, 6081.
- [7]. A. V. Marenich, C. J. Cramer, D. G. Truhlar, *J. Phys. Chem. B*, **2009**, *113*, 6378.
- [8]. K. Fukui, *J. Phys. Chem.*, **1970**, *74*, 4161.
- [9]. K. Fukui, *Acc. Chem. Res.*, **1981**, *14*, 363.
- [10] Liu Z, Babu K R, Wang F, Yang Y, Bi X, Influence of sulfonyl substituents on the decomposition of N-sulfonylhydrazones at room temperature. *Organic & Biomolecular Chemistry*, 2019,6: 121-124.
